1  
2  
3  
4  
5  
6  
7  
8  
9  
10  
11  
12  
13  
14  
15  
16  
17  
18  
19  
20

**Full title:**

**A tale of two fish: Comparative transcriptomics of resistant and susceptible steelhead following exposure to *Ceratonova shasta* highlights differences in parasite recognition**

**Short title:**

**Differential pathogen recognition in a model fish-myxozoan system: a comparative transcriptomics study**

Damien Barrett,<sup>1</sup> Jerri L. Bartholomew<sup>1\*</sup>

<sup>1</sup> Department of Microbiology, Oregon State University, Corvallis, Oregon, United States of America

\* Corresponding author. Email: [Jerri.Bartholomew@oregonstate.edu](mailto:Jerri.Bartholomew@oregonstate.edu)

21

## 22 **Abstract**

23 Diseases caused by myxozoan parasites represent a significant threat to the health of  
24 salmonids in both the wild and aquaculture setting, and there are no effective therapeutants for  
25 their control. The myxozoan *Ceratomyxa shasta* is an intestinal parasite of salmonids that  
26 causes severe enteronecrosis and mortality. Most fish populations appear genetically fixed as  
27 resistant or susceptible to the parasite, offering an attractive model system for studying the  
28 immune response to myxozoans. We hypothesized that early recognition of the parasite is a  
29 critical factor driving resistance and that susceptible fish would have a delayed immune  
30 response. RNA-seq was used to identify genes that were differentially expressed in the gills and  
31 intestine during the early stages of *C. shasta* infection in both resistant and susceptible  
32 steelhead (*Oncorhynchus mykiss*). This revealed a downregulation of genes involved in the IFN-  
33  $\gamma$  signaling pathway in the gills of both phenotypes. Despite this, resistant fish quickly contained  
34 the infection and several immune genes, including two innate immune receptors were  
35 upregulated. Susceptible fish, on the other hand, failed to control parasite proliferation and had  
36 no discernible immune response to the parasite, including a near-complete lack of differential  
37 gene expression in the intestine. Further sequencing of intestinal samples from susceptible fish  
38 during the middle and late stages of infection showed a vigorous yet ineffective immune  
39 response driven by IFN- $\gamma$ , and massive differential expression of genes involved in cell adhesion  
40 and the extracellular matrix, which coincided with the breakdown of the intestinal structure. Our  
41 results suggest that the parasite may be suppressing the host's immune system during the initial  
42 invasion, and that susceptible fish are unable to recognize the parasite invading the intestine or  
43 mount an effective immune response. These findings improve our understanding of myxozoan-  
44 host interactions while providing a set of putative resistance markers for future studies.

45

## 46 Introduction

47 *Ceratonova shasta* (syn. *Ceratomyxa shasta*) is a myxozoan parasite of salmonid fish  
48 that is endemic to most river systems in the Pacific Northwest of the United States [1,2]. It is  
49 recognized as an economically important pathogen of both wild and hatchery-reared salmonids  
50 [3–6] and has been linked to population-level declines [7,8]. *C. shasta* has a broad host range  
51 and is able to infect most, if not all, native salmonid species [2]. The initial site of infection is the  
52 gills, where the parasite spore attaches to the epithelium prior to invading the blood vessels and  
53 beginning replication. Travelling via the bloodstream, it reaches the intestine 4 to 5 days after  
54 the initial infection, where it continues to replicate and undergoes sporogenesis [9]. Severe  
55 infections result in enteronecrosis (ceratomyxosis) and death of the host. Fish stocks in the  
56 Pacific Northwest are highly divergent in their innate resistance to *C. shasta* induced mortality:  
57 those originating from *C. shasta* endemic watersheds exhibit a high degree of resistance [8,10],  
58 whereas allopatric fish are highly susceptible [8,11]. Numerous studies have demonstrated that  
59 resistance to *C. shasta* is a genetically controlled trait that shows little variation within a given  
60 population [12–17].

61 While the innate resistance of the host is a primary factor in the outcome of infection,  
62 disease severity falls on a spectrum that is heavily influenced by the exposure dynamics, which  
63 include exposure concentration and duration, water temperature, and parasite virulence [8]. At  
64 the very low end of this spectrum, susceptible fish appear unable to mount an effective immune  
65 response to *C. shasta* and suffer mortality rates at or near 100% at doses as low as one spore  
66 per fish [11,18]. When resistant fish are exposed under similar conditions, few if any parasites  
67 reach the intestine and no clinical signs of disease are observed [19–21]. However, if the  
68 exposure dose is high, typically greater than 10,000 spores, resistant fish may succumb to the

69 infection and the disease progresses as it does in susceptible fish [9,22]. When resistant fish  
70 experience more intermediate exposure conditions, *C. shasta* is observed reaching the intestine  
71 but the fish are able to control and eventually clear the infection [23]. Bartholomew et al. found  
72 that resistant steelhead (*Oncorhynchus mykiss*) and cutthroat trout (*O. clarkii*) chronically  
73 exposed to *C. shasta* at low temperatures (< 10° C) had infections characterized by large  
74 numbers of parasites on the intestinal mucosal surface and multiple foci of inflammation in that  
75 tissue [5]. However, sporogenesis was not observed, mortality rates were low, and observations  
76 of fibrosis in histological sections suggested that fish were recovering from the infection.  
77 Containment of the parasite in well-defined granulomas has also been observed in sub-lethal  
78 exposures of resistant steelhead trout and Chinook salmon (*O. tshawytscha*) [20,22,24].

79         Understanding the host response to infection is complicated by the fact that *C. shasta* is  
80 a species complex, comprised of four distinct genotypes that have different salmonid host  
81 associations: genotype 0 with *O. mykiss*; genotype I with Chinook salmon; and genotype II,  
82 which is considered a generalist that is able to infect multiple fish species but contains a mix of  
83 two genetically distinct subtypes named after their associated hosts: IIR for rainbow trout  
84 (freshwater strain of *O. mykiss*) and IIC for coho salmon (*O. kisutch*) [2,25–27]. Along with  
85 different host specificities, these genotypes have different effects on their hosts. Genotype 0  
86 typically causes chronic infections with no apparent morbidity or mortality. In contrast,  
87 genotypes I and II may be highly pathogenic in their respective hosts, causing the disease signs  
88 that are classically associated with *C. shasta* infections.

89         Knowledge of the infecting genotypes, and establishment of parasite's lifecycle in a  
90 laboratory setting [28], has permitted investigations of the immune response to *C. shasta* be  
91 conducted in a controlled setting with known genotypes. One of the first, by Bjork et al.,  
92 compared the host response of susceptible and resistant Chinook salmon to *C. shasta* genotype  
93 I infection [25]. No difference in parasite burden at the gills was detected. However, in the

94 intestine, resistant fish had both a lower infection intensity and a greater inflammatory response  
95 than susceptible fish and were able to eventually clear the infection. Both phenotypes had  
96 elevated expression of the pro-inflammatory cytokine IFN- $\gamma$  in the intestine, but only susceptible  
97 fish had elevated levels of the anti-inflammatory cytokine IL-10. A similar trend was found in a  
98 subsequent study of susceptible rainbow trout infected with genotype IIR, with significant  
99 upregulation of IFN- $\gamma$ , IL-10, and IL-6 [29]. It has also been demonstrated that fish exposed to *C.*  
100 *shasta* are able to produce parasite-specific IgM and IgT [30,31]. Both IgM and IgT were found  
101 to be upregulated in high mortality genotype IIR infections [29], but whether this antibody  
102 response offers any protection against *C. shasta* pathogenesis remains to be determined.

103           Currently, no prophylactic or therapeutic treatments exist for *C. shasta* induced  
104 enteronecrosis and efforts to manage the disease revolve around selective stocking of resistant  
105 fish. However, even resistant fish may succumb to infection [8] and assessing the resistance  
106 level of a fish stock requires a series of lethal parasite challenges with large groups of fish.  
107 Insight into the molecular and genetic basis of resistance will help facilitate the development of  
108 vaccines and therapeutics for this pathogen as well as provide a non-lethal biomarker for  
109 assessing a stock's resistance. More broadly, the immune response to myxozoan pathogens  
110 remains largely uncharacterized, having been explored in a limited number of species. As a  
111 result, there is a near complete lack of therapeutics or other disease control measures, an issue  
112 that is becoming more evident as aquaculture continues to increase worldwide [32,33]. *C.*  
113 *shasta* genotype II presents a unique model for studying the immune response to myxozoans as  
114 it is highly virulent and fish hosts are either highly resistant, or completely susceptible to the  
115 parasite, rather than falling on a continuum. Additionally, the resistance phenotype of many fish  
116 stocks is already known, which avoids the issue of *ad hoc* determination of phenotype or the  
117 need to create resistance and susceptible lines of fish for research. *C. shasta* is also one of the  
118 few myxozoans whose complete life cycle is both known and maintained in a laboratory setting.

119 The fact that *O. mykiss* is the primary fish host is also advantageous, as rainbow trout is one of  
120 the most widely studied and cultivated fish species and an extensive knowledge base exists for  
121 it, including a fully sequenced genome. Taken together, we believe that the *C. shasta*-*O. mykiss*  
122 system offers a tractable model for studying the immune response to myxozoans and what  
123 genes drive resistance.

124 With this in mind, we chose to use resistant and susceptible steelhead as model for  
125 understanding how and when the host responds to infection at the transcriptomic level. We  
126 hypothesized that early recognition of the parasite by the host was a critical factor in resistance  
127 and that susceptible fish would fail to recognize the initial infection, responding only after the  
128 parasite began to proliferate within the intestine. Conversely, we hypothesized that resistant fish  
129 would quickly recognize and respond to the infection, preventing parasite establishment in the  
130 intestine and proliferation once there. To test this, we held both phenotypes in the same tank  
131 and exposed them in parallel to *C. shasta* to ensure equivalent exposure conditions. Infected  
132 tissue was collected from both phenotypes at 1, 7, 14, and 21 days post exposure (dpe) to  
133 assess parasite proliferation using qPCR (all timepoints) and the local host immune response  
134 during the early stages of infection (1 and 7 dpe) using RNA-Seq.

## 135 **Material and methods**

### 136 **Fish**

137 Resistant steelhead from the Round Butte Hatchery and susceptible steelhead from the  
138 Asea Hatchery, both located in Oregon, USA, were used in this study. From each hatchery, 6  
139 adults were collected (3 male, 3 female) and bred to create pure-parental offspring. The  
140 offspring were raised at the Oregon State University (OSU) John L. Fryer Aquatic Animal Health  
141 Laboratory in Corvallis, Oregon, USA. The fish were fed daily with a commercial diet (Bio-

142 Oregon, Longview, Washington, USA), and reared in tanks supplied with 13.5° C specific-  
143 pathogen free (SPF) well water. Two weeks prior to the parasite challenge, the fish were fin-  
144 clipped for identification and transferred to 100-liter tanks and acclimated to 18°C. This  
145 temperature was chosen as it reflective of the river water temperatures that out-migrating  
146 salmon experience when they are exposed to *C. shasta*, and aligns with previous studies [34].

## 147 **Parasite challenge**

148 *C. shasta* genotype IIR actinospores were collected from two colonies of *Manayunkia*  
149 *occidentalis*, the freshwater annelid host [35], which were maintained in indoor mesocosms  
150 receiving flow-through UV-treated river water. Influent water to each colony was shut off 24  
151 hours prior to the challenge to allow actinospores to accumulate in the mesocosm water. To  
152 ensure that both the resistant and susceptible fish were exposed to the same concentration of  
153 actinospores, 50 fish (susceptible average 42.2 ± 3.2 g; resistant average 39.4 ± 2.9 g) from  
154 each stock (differentiated on the presence of a fin clip) were placed together in identical control  
155 and treatment tanks containing 375-liters of water maintained at 18°C. Three liters of mesocosm  
156 water, which contained an estimated 4,500 actinospores based on monitoring of parasite  
157 production by qPCR [36], was added to the treatment tank. At the same time, three liters of  
158 water from an uninfected annelid mesocosm was added to the control tank. Fish were held on  
159 static water with aeration for 24 hours, at which time each treatment group (resistant exposed,  
160 resistant control, susceptible exposed, susceptible control) was sorted and placed into triplicate  
161 25-liter tanks (12 total) that were randomly assigned and supplied with 18°C water. Water  
162 samples were collected from the exposure tanks immediately after the mesocosm water was  
163 added and after the fish were removed to quantify the number of *C. shasta* spores present at  
164 the beginning and end of the challenge. The water samples were immediately filtered and  
165 prepared for qPCR following a previously described method [36].

## 166 **Sample collection**

167 Fish were sampled at 1, 7, 14, and 21 days post exposure (dpe), with 1 dpe  
168 corresponding to 24 hours after initiation of parasite exposure. Fish were sampled at the same  
169 time of day to minimize possible changes in gene expression due to circadian rhythms [37]. At  
170 each timepoint, 3 fish from each tank were euthanized with an overdose of MS-222 (tricaine  
171 methanesulfonate, Argent Laboratories, Redmond, WA, USA) for a total of 12 fish per treatment  
172 group, and 48 per timepoint. From 2 of the 3 fish, gills (1 dpe) or intestine (7, 14, 21 dpe) were  
173 collected whole and immediately placed in RNAlater and stored at 4° C for 24 hours, prior to  
174 being placed at -80° C for long term storage. From the remaining fish, gills and intestine were  
175 collected and placed in Dietrich's fixative for histology. All methods involving live fish were  
176 approved by Oregon State University's IACUC (protocol # 4660). A summary diagram of the  
177 experimental setup is shown in Fig 1.

**Fig 1. Experimental diagram of the exposure conditions and subsequent sampling of steelhead.** Susceptible steelhead (green) and resistant steelhead (orange) were exposed to *Ceratonova shasta* for 24 hours and then each phenotype was separated and placed into triplicate tanks. Resistant fish had been previously fin-clipped as a means of identification. dpe = days post exposure.

178

## 179 **Sample processing**

180 Due to variation in the size of the gills and intestine between fish, each tissue was  
181 homogenized in liquid nitrogen using a porcelain mortar & pestle and subsampled. RNA was  
182 extracted from 25 mg of homogenized tissue using the RNeasy Mini Kit (Qiagen, catalog  
183 number 74104) following the manufacturer's protocol. DNA was extracted from 25 mg of  
184 homogenized tissue from each sample using the DNeasy Blood & Tissue Kit (Qiagen, catalog  
185 number 69506) and eluted in 30 µl of Buffer AE, applied to the spin column twice, to achieve a



186 higher concentration. The purity and concentration of the extracted RNA and DNA was  
187 assessed using a NanoDrop ND-1000 UV-Vis Spectrophotometer.

188 To assess the parasite load in each of the tissues, a previously developed *C. shasta*  
189 qPCR assay [36] was used to quantify the amount of parasite DNA present. 100 ng of DNA  
190 extracted from each sample was assayed in triplicate wells through 40 cycles using an Applied  
191 Biosystems StepOnePlus Real-Time PCR System. A sample was considered positive for *C.*  
192 *shasta* if all wells fluoresced and the sample was rerun if the Cq standard deviation between  
193 wells was greater than 1. On each qPCR plate, a positive control, a negative control (molecular  
194 grade water), and a standard curve of dilutions equivalent to 1, 10, 100, and 1000 actinospores  
195 was included.

196 Histological sections were prepared by the OSU Veterinary Diagnostic Laboratory,  
197 Corvallis, OR, USA and stained with H&E.

## 198 **Sequencing**

199 To understand the transcriptomic response of both resistant and susceptible fish during  
200 the early stages of *C. shasta* infection, mRNA from the gills at 1 dpe and from the intestine at 7  
201 dpe was chosen for sequencing. To control for possible confounding variables, such as tank  
202 effects, six samples from each treatment group were chosen at random and were evenly split  
203 across the three tanks housing each group. 48 samples (24 per timepoint) were submitted to the  
204 Center for Genome Research and Biocomputing at OSU for library preparation and sequencing.  
205 The integrity of the RNA was confirmed by running each sample on an Agilent Bioanalyzer 2100  
206 (Agilent Technologies, USA). 1 ug of RNA was used for library preparation using the Illumina  
207 TruSeq™ Stranded mRNA LT Sample PrepKit according to the manufacturer's instructions (Cat.  
208 No. RS-122-2101, Illumina Inc. San Diego, CA, USA). Library quality was checked with a 4200  
209 TapeStation System (Agilent Technologies, USA) and quantified via qPCR. All libraries were

210 sequenced on 4 lanes of an Illumina HiSeq 3000 as 100-bp single-end runs. The libraries were  
211 randomly distributed across the 4 lanes, 12 per lane.

212 Examination of the sequencing data from 7 dpe led us to sequence intestinal mRNA  
213 from susceptible fish at 14 and 21 dpe to follow the response in a progressive infection. Since  
214 we anticipated large differences in gene expression at these timepoints due to the intense  
215 histological changes observed, we chose to sequence six samples from each timepoint (3  
216 exposed, 3 control) and do so at a higher depth of coverage to account for a greater proportion  
217 of the sequenced reads coming from parasite mRNA. 12 samples (6 per timepoint) were  
218 submitted for library preparation and sequencing as described above and were sequenced on  
219 two 100-bp single-end lanes. Resistant fish were not sequenced at these timepoints due to the  
220 low infection prevalence and intensity, the minimal transcriptomic response at 7 dpe, and  
221 because no tissue response was observed by histology.

## 222 **Data analysis**

223 Adapter sequences were trimmed from the raw reads using BBDuk (January 25, 2018  
224 release), which is part of the BBTools package [38], and all reads less than 30-bp after trimming  
225 were discarded. Library quality was assessed before and after trimming using FastQC (v0.11.8)  
226 [39]. Reads were then mapped to the latest rainbow trout reference genome (GenBank:  
227 MSJN00000000.1) using HiSat2 (v 2.1.0) [40]. Due to the high number of homeologs present in  
228 the *O. mykiss* genome [41], the aligned reads were filtered and sorted using SAMtools (v 1.9)  
229 [42] to exclude all reads that mapped to more than one location in the genome. The number of  
230 reads that mapped to each gene was calculated using HTSeq-count (v 0.11.1) [43] and the raw  
231 counts imported in R 3.4.1 [44] and loaded into the package DESeq2 (v 1.18.1) [45]. To identify  
232 potential outliers, heatmaps and PCA plots were constructed from the raw counts that were  
233 regularized log-transformed using the DESeq2 function `rlogTransformation()`.

234

235           Differentially expressed genes (DEGs) were identified using the negative binomial  
236 Wald test in DESeq2 and were considered significant at a Benjamini–Hochberg False Discovery  
237 Rate (FDR) adjusted p-value < 0.05 and an absolute  $\log_2(\text{fold change}) > 1$ . Annotation of the  
238 DEGs and gene ontology (GO) enrichment was conducted with Blast2GO (v 5.2.5) [46] with a  
239 blast e-value cutoff of  $1e^{-5}$ . To obtain high quality and informative annotations, genes were  
240 preferentially annotated with the SWISS-PROT database [47] followed by the NCBI  
241 nonredundant database and a taxonomy filter of ‘Actinopterygii’ and ‘Vertebrata’ was applied. All  
242 genes detected within a tissue were used as the background for GO enrichment. Enriched GO  
243 terms along with their FDR-adjusted p-values, were imported into Cytoscape (v 3.7.2) [48] for  
244 visualization with the ClueGo (v 2.5.6) [49] plugin, which clusters genes and GO terms into  
245 functionally related networks. *O. mykiss* was chosen as the organism for Ontologies/Pathways  
246 and the GO Term Fusion option was used to merge GO terms based on similar associated  
247 genes. Volcano plots were constructed with the R package EnhancedVolcano (v 1.0.1) [50].

248

## 249 **RNA-seq validation by quantitative reverse transcription PCR**

### 250 **(RT-qPCR)**

251

252           The expression of four immune genes (*IFN- $\gamma$* , *TNF- $\alpha$* , *IL-10*, *IL-1 $\beta$* ) found to be  
253 differentially expressed by RNA-seq were validated by quantitative reverse transcription PCR  
254 (RT-qPCR). RNA was extracted from each sample using the RNeasy Mini Kit (Qiagen) with  
255 optional on-column DNase I digestion. The purity and concentration of the extracted RNA was  
256 analyzed using a NanoDrop ND-1000 UV-Vis Spectrophotometer. 1  $\mu\text{g}$  of RNA from each  
257 sample was reverse transcribed into cDNA using the High Capacity cDNA Reverse  
258 Transcription Kit (Applied Biosystems) according to the manufactures protocol. RT-qPCR was

259 conducted in a 96-well plate format using the Applied Biosystems StepOnePlus Real-Time PCR  
260 System. All samples were run in triplicate and each 10  $\mu$ l reaction contained 2  $\mu$ L of cDNA (40-  
261 fold diluted), 5  $\mu$ L of 2x Power SYBR™ Green PCR Master Mix (ThermoFisher Scientific), 1  $\mu$ L  
262 each of forward and reverse primers, and 1  $\mu$ L molecular grade water (Lonza). Each primer pair  
263 was tested using a 5-point serial dilution to ensure an efficiency between 90-100% and melt-  
264 curve analysis was performed after each run to check for the presence of a single PCR product.  
265 The  $2^{-\Delta\Delta C_t}$  method was used to determine relative gene expression with elongation factor-1 $\alpha$   
266 (EF-1 $\alpha$ ) serving as the housekeeping gene for normalization [51]. The list of primers used, and  
267 their amplification efficiencies are listed in S1 Table.

268

## 269 **Results**

### 270 **Infection of resistant and susceptible fish stocks**

271 The exposure dose for treatment and control groups (calculated by qPCR) was  $7.9 \times 10^3$   
272 and 0 actinospores respectively (extrapolated from 1 actinospore standard). Water samples

**Fig 2. Histological sections of resistant and susceptible steelhead intestine after exposure to *Ceratonova shasta*.** Susceptible fish intestine at (A) 7 days post exposure (dpe), (B) 14 dpe showing chronic inflammation (asterisks) throughout the submucosa, and (C) 21 dpe with inflammation present in all tissue layers and sloughing of necrotic epithelia (arrow). Resistant fish intestine at (D) 7 dpe and (E) 21 dpe. Mature *C. shasta* myxospore (arrow) in the intestine of susceptible fish at 21 dpe (F). Bars = 100  $\mu$ m.

273 taken at 24 hours were negative, indicating that the spores present successfully attached to the  
274 fish. Susceptible fish exposed to *C. shasta* exhibited their first clinical sign of infection at 12 dpe  
275 when they stopped responding to feed. At 21 dpe, their intestines were grossly enlarged,  
276 inflamed, and bloody, with mature *C. shasta* myxospores visible in swabs of the posterior  
277 intestine. Histology revealed a progressive breakdown of the intestinal structure in these fish  
278 (Fig 2A,C). By 14 dpe, chronic inflammation could be observed throughout the intestinal  
279 submucosa (Fig 2B) and by 21 dpe, all tissue layers were inflamed and sloughing of necrotic  
280 mucosal tissue was evident (Fig 2C). No physiological changes were observed by histology in  
281 resistant fish (Fig 2D,E).

## 282 qPCR quantification of parasite burden

283 *C. shasta* was not detected by qPCR in the gills at 1 dpe in either the resistant or  
284 susceptible fish but was detected in the intestine at 7 dpe in both phenotypes. The infection  
285 prevalence among resistant fish remained low throughout the sampling period, with less than  
286 half the fish at any timepoint having detectable levels of *C. shasta* in their intestine, and the Cq  
287 values of those fish also remained low ( $31.6 \pm 2.2$ ). In contrast, all susceptible fish tested from 7  
288 dpe onwards were positive and had exponentially increasing parasite loads, with Cq values  
289 increasing from  $24.8 \pm 0.8$  at 7 dpe to  $12.6 \pm 0.8$  at 21 dpe (Fig 3). No control fish or exposed  
290 resistant fish exhibited clinical signs of infection, and randomly selected control fish were  
291 negative by qPCR.

**Fig 3. Relative quantity of *Ceratonova shasta* DNA present in the gills (1 dpe) and intestine (7, 14, and 21 dpe) of infected steelhead (*Oncorhynchus mykiss*).** Each symbol represents the average quantitative cycle (Cq) of 100 ng of DNA extracted from the whole tissue (gills or intestine) of one fish that was assayed in triplicate by qPCR. Six fish of each phenotype were assayed at each timepoint. Fish that tested negative were assigned a nominal Cq value of 41. Dashed red lines indicate the average Cq values obtained from 1 and 1000 actinospore standards.

## 292 Sequencing

293 A total of  $1.55 \times 10^9$  reads were generated from the sequencing of samples from  
294 resistant and susceptible fish at 1 and 7 dpe, with an average of  $3.22 \times 10^7$  (SD  $\pm 4.04 \times 10^6$ )  
295 reads per sample (Table 1). 87.6% of reads could be mapped to the rainbow trout reference  
296 genome and 74.8% could be uniquely mapped to specific loci.

Table 1. Summary of sequencing results from gill (1 dpe) and intestine (7 dpe) of both resistant and susceptible fish.

| 297 Sequenced Reads      |                       |
|--------------------------|-----------------------|
| 298 Total                | 1,545,135,474         |
| Removed                  | 518,329 (0.000335%)   |
| Mapped                   | 1,354,217,365 (87.6%) |
| 299 Uniquely Mapped      | 1,156,186,486 (74.8%) |
| Average reads per sample | 32,190,322            |

300

301  $7.80 \times 10^8$  reads were generated during the sequencing of samples from susceptible fish  
302 at 14 and 21 dpe, with an average of  $6.33 \times 10^7$  (SD  $\pm 6.00 \times 10^6$ ) reads per sample. The  
303 number of reads from exposed susceptible fish that could be mapped to the reference genome  
304 decreased to 83.2% at 14 dpe and 42.0% at 21 dpe, reflecting an increase in the amount of  
305 parasite RNA present (Table 2).

Table 2. Percentage of sequencing reads that mapped to the reference genome at each timepoint.

| 306 % of reads mapped |       |       |        |        |
|-----------------------|-------|-------|--------|--------|
|                       | 1 dpe | 7 dpe | 14 dpe | 21 dpe |
| Susceptible - Exposed | 87.5  | 88.0  | 83.2   | 42.0   |
| Resistant - Exposed   | 87.7  | 87.4  | -      | -      |
| Susceptible - Control | 87.3  | 87.8  | 87.2   | 87.9   |
| Resistant - Control   | 87.9  | 87.7  | -      | -      |

## 307 Gills 1 dpe - resistant and susceptible fish - differential gene 308 expression and GO enrichment

309 The expression of 39,571 genes was detected from sequenced gill transcripts. DEGs  
310 responding to *C. shasta* infection were identified by comparing exposed resistant and  
311 susceptible fish to their respective controls. This identified 463 DEGs in susceptible fish and 244  
312 in resistant fish, 66 of which were differentially expressed in both phenotypes (Fig 4).

**Fig 4. Venn Diagram showing the number of genes differentially expressed in response to *Ceratonova shasta* infection in the gills of resistant and susceptible steelhead at 1 day post exposure.**  
Arrows indicate upregulation vs downregulation.

313

314 GO enrichment was conducted to gain insight into the biological processes, molecular  
315 functions, and cellular location of the DEGs. In susceptible fish, no specific enrichment was  
316 found among the upregulated genes and two GO terms were over-represented among genes  
317 upregulated in resistant fish (*carbon dioxide transport* and *one-carbon compound transport*).  
318 Among the downregulated genes, resistant fish had 156 enriched GO terms, and susceptible  
319 fish had 51. ClueGo analysis revealed that genes involved in the innate immune response,  
320 interferon-gamma mediated signaling pathway, response to cytokine, and response to biotic  
321 stimulus were over-represented among the downregulated genes for both resistant and  
322 susceptible fish (Fig 5). Many of the downregulated immune genes were shared by both  
323 phenotypes (Table 3), including interferon gamma 2, Interferon-induced protein 44, and several  
324 C-C motif chemokines.

**Fig 5. GO enrichment among the genes downregulated in the gills of resistant (A) and susceptible (B) steelhead at 1 day post exposure to *Ceratonova shasta*.** Enriched gene ontology (GO) terms were grouped into functionally related nodes using the Cytoscape plugin ClueGO. Nodes are colored and grouped according to a related function and labelled by the most significant term of the group. Node size corresponds to the FDR-adjusted p-value of each GO term and is specific to each graph.

325

326

327

328

**Table 3. Select immune genes that were differentially expressed in the gills of resistant and susceptible steelhead at 1 day post exposure to *Ceratonova shasta*. Non-significant differences in expression are marked as “-”.**

| Entrez Gene ID | Protein Product                                           | Log <sub>2</sub> -FC Resistant | Log <sub>2</sub> -FC Susceptible |
|----------------|-----------------------------------------------------------|--------------------------------|----------------------------------|
| ifngamma2      | interferon gamma 2 precursor                              | -2.4                           | -2.5                             |
| LOC110502724   | interferon-induced protein 44-like                        | -2.9                           | -2.7                             |
| LOC110491862   | tumor necrosis factor receptor superfamily member 6B-like | -2.1                           | -1.8                             |
| LOC110525651   | OX-2 membrane glycoprotein-like                           | -2.3                           | -1.5                             |
| LOC110509876   | C-C motif chemokine 19                                    | -2.0                           | -1.8                             |
| LOC110536450   | C-C motif chemokine 4-like                                | -3.1                           | -2.2                             |
| LOC110514657   | C-C motif chemokine 13-like                               | -2.5                           | -1.7                             |
| LOC110514021   | CD83 antigen-like (1)                                     | -2.3                           | -1.6                             |
| LOC110534699   | CD83 antigen-like (2)                                     | -1.3                           | -1.5                             |
| cxcl1b         | chemokine CXCF1b precursor                                | -1.7                           | -1.3                             |
| socs1          | suppressor of cytokine signaling 1                        | -1.8                           | -1.3                             |
| LOC110488345   | antigen peptide transporter 2-like                        | -1.0                           | -1.0                             |
| LOC110536401   | interleukin-1 beta-like                                   | -1.0                           | -                                |
| irf-1          | interferon regulatory factor 1                            | -1.8                           | -                                |
| il17c1         | interleukin 17C1 precursor                                | -                              | -1.6                             |
| LOC110497745   | interleukin-17F-like                                      | -                              | -2.5                             |
| LOC110520644   | interferon-induced GTP-binding protein Mx-like            | -                              | -2.2                             |
| LOC110502724   | interferon regulatory factor 1-like                       | -                              | -2.9                             |
| cxcl13         | chemokine CXCL13 precursor                                | -                              | -4.6                             |
| LOC110535225   | B-cell receptor CD22-like                                 | -                              | 1.2                              |
| LOC110534952   | CD209 antigen-like protein E                              | -                              | 1.1                              |
| LOC110487421   | NOD-like receptor C5                                      | 1.7                            | -                                |
| LOC110485505   | Fc receptor-like protein 5 isoform                        | 1.4                            | -                                |
| LOC110516728   | GTPase IMAP family member 4-like (1)                      | 22.0                           | -                                |
| LOC110521965   | GTPase IMAP family member 4-like (2)                      | 7.6                            | -                                |

Non-significant differences in expression are marked as “-”.

329



330 While most immune related DEGs were downregulated in both phenotypes, the two  
 331 most highly upregulated genes in resistant fish were homologs of GTPase IMAP family member  
 332 4-like at 22.0 and 7.6 log<sub>2</sub>-FC, respectively. GIMAPs (GTPase of the immunity associated  
 333 protein family) are a relatively recently described family of small GTPases that are conserved  
 334 among vertebrates and are associated with T-lymphocyte development and activation [52]. Two  
 335 immune receptors were also upregulated in resistant fish: NLRC 5 and Fc receptor-like protein  
 336 5. In susceptible fish, only two immune genes were upregulated: B-cell receptor CD22-like and  
 337 CD209 antigen-like protein E.

### 338 Intestine 7 dpe - resistant and susceptible fish - differential 339 expression and GO enrichment

340 37,978 genes were identified in the intestine at 7 dpe. As for gills, DEGs were identified  
 341 by comparing exposed fish to their unexposed controls. In contrast to the large number of DEGs  
 342 in the gills at 1 dpe, only 16 DEGs were identified in resistant fish, 4 in susceptible fish, and no  
 343 DEGs overlapped between them (Table 4). No GO enrichment was conducted due to the small  
 344 number of DEGs.

345

**Table 4. Genes that were differentially expressed in the intestine of resistant and susceptible steelhead 7 days post exposure to *Ceratonova shasta*.** Genes with known immune functions are in bold. Non-significant differences in expression are marked as "-".

| Entrez Gene ID      | Protein Product                                       | Log <sub>2</sub> -FC Resistant | Log <sub>2</sub> -FC Susceptible |
|---------------------|-------------------------------------------------------|--------------------------------|----------------------------------|
| <b>LOC110534740</b> | <b>fucolectin 6</b>                                   | <b>9.4</b>                     | -                                |
| LOC110492870        | aginyl-tRNA--protein transferase 1                    | 6.4                            | -                                |
| LOC110539108        | battenin-like                                         | 6.2                            | -                                |
| LOC110534594        | fibronectin-like                                      | 4.6                            | -                                |
| LOC110507973        | myb/SANT-like DNA-binding domain-containing protein 4 | 4.4                            | -                                |
| <b>LOC110487421</b> | <b>protein NLRC5</b>                                  | <b>3.3</b>                     | -                                |
| <b>LOC110502432</b> | <b>ras guanyl-releasing protein 3</b>                 | <b>3.3</b>                     | -                                |

|  |                                   |                                                 |            |      |
|--|-----------------------------------|-------------------------------------------------|------------|------|
|  | lncRNA                            | lncRNA 3 3                                      | 2.7        | -    |
|  | LOC110536765                      | uncharacterized protein LOC110536765            | 2.7        | -    |
|  | <b>lg kappa-b4 chain C region</b> | <b>immunoglobulin kappa constant</b>            | <b>1.9</b> | -    |
|  | LOC110501851                      | isocitrate dehydrogenase e                      | -1.1       | -    |
|  | LOC110504050                      | WW domain-containing oxidoreductase             | -1.1       | -    |
|  | LOC110507963                      | retinol-binding protein 2                       | -1.4       | -    |
|  | LOC100135970                      | toxin-1 precursor                               | -2.0       | -    |
|  | LOC110487883                      | 1-acylglycerol-3-phosphate O-acyltransferase    | -3.9       | -    |
|  | LOC110517324                      | desmin-like                                     | -5.2       | -    |
|  | LOC110512982                      | protein CREG1-like                              | -          | 21.3 |
|  | LOC110507394                      | angiopoietin 1                                  | -          | 2.3  |
|  | LOC110520527                      | uncharacterized protein LOC110520527            | -          | 1.5  |
|  | LOC110520289                      | trans-1,2-dihydrobenzene-1,2-diol dehydrogenase | -          | -1.5 |

Genes with known immune functions are in bold. Non-significant differences in expression are marked as "-".

346

347           Among the DEGs in resistant fish that have known functions, four immune genes were  
348 upregulated, including two innate immune receptors: Fuclectin 6, an F-type lectin that binds  
349 fucose, and NLRC 5, which was also upregulated in the gills of resistant fish at 1 dpe. Two  
350 immune genes involved in B cell responses were also upregulated: Ras guanyl-released protein  
351 3, involved in B cell activation [53], and immunoglobulin kappa constant. Fibronectin-like, an  
352 extracellular matrix protein, and battenin-like were also significantly upregulated. Battenin, also  
353 called CLN3, is a highly conserved multi-pass membrane protein that localizes to the lysosome  
354 and other vesicular compartments, but the function of which remains unknown [54]. The most  
355 downregulated gene in resistant fish was desmin-like protein, a muscle specific intermediate  
356 filament.

357           In susceptible fish, the cell-growth inhibitor protein CREG1 was the most highly  
358 upregulated transcript, followed by the vascular growth factor angiopoietin-1-like.

## 359 **Comparison of resistant and susceptible controls**

360 To identify any genes involved in resistance to *C. shasta* that might be constitutively  
361 expressed in resistant fish, we conducted a differential gene expression analysis comparing the  
362 uninfected controls for both phenotypes. This yielded 1400 DEGs in the gills, and 307 in the  
363 intestine. 38 DEGs were present in both tissues and upregulated in resistant fish relative to  
364 susceptible fish (S2 Table). Among them were six genes associated with immune system  
365 functions: two homologs of NLRC 5 (not the same one upregulated in response to *C. shasta*  
366 infection), GTPase IMAP family member 7-like, complement C1q-like protein 2, TGF-beta  
367 receptor type-2-like, and perforin-1-like.

368

## 369 Intestine - susceptible fish - 14 and 21 dpe - differential gene 370 expression and GO enrichment

371 The transcriptomic response of susceptible fish was followed through later timepoints to  
372 determine how these fish reacted as the parasite continued to proliferate. Sequencing of  
373 infected fish and their time-matched controls identified 36,957 and 36,346 gene transcripts at 14  
374 and 21 dpe, respectively. Comparison to the intestine of uninfected susceptible fish revealed  
375 5,656 DEGs at 14 dpe and 12,061 DEGs at 21 dpe, 3,708 of which were differentially expressed  
376 at both timepoints (Fig 6).

**Fig 6. Differential expression results for susceptible fish at 14- and 21-days post exposure (dpe) to *Ceratonova shasta*.** A) Venn diagram indicating the number of differentially expressed genes overlapping at 14- and 21 dpe. Arrows indicate up- vs. downregulation. B) Volcano plot of differential gene expression for susceptible fish at 14 dpe. Each dot represents the average value of one gene across three biological replicates. Red indicates the gene was significant at the FDR-adjusted p-value and Log<sub>2</sub>-Foldchange threshold, blue is significantly only by p-value, green only by Log<sub>2</sub>-Foldchange, and gray were not significant by either metric. B) Same as (A), but for susceptible fish at 21 dpe.

377

378 GO enrichment analysis of the 2,977 upregulated genes at 14 dpe indicated 631 over-  
379 represented GO terms, primarily immune related. ClueGO analysis clustered these into  
380 networks revolving around GO terms for interferon-gamma-mediated signaling pathway,

**Fig 7. Functional enrichment of biological processes among the genes differentially expressed in the intestine of susceptible fish at 14 days post exposure to *Ceratonova shasta*.** Enriched gene ontology (GO) terms were grouped into functionally related nodes using the Cytoscope plugin ClueGO. Nodes are colored and grouped according to a related function and labelled by the most significant term of the group. Node size corresponds to the FDR-adjusted p-value of each GO term and is specific to each graph. The analysis was conducted separately on upregulated (A) and downregulated (B) genes.

381 regulation of defense response, positive regulation of response to external stimulus, immune  
382 response, and innate immune response (Fig 7A). The same analysis for the 2,677  
383 downregulated genes at 14 dpe yielded 196 GO terms, which clustered into networks based on  
384 terms for oxidation-reduction process, mitochondrion organization, translation, and lipid  
385 catabolic process (Fig 7B).

386

387 At 21 dpe, the 6,054 upregulated genes contained 452 over-represented GO terms  
388 which primarily clustered into networks revolving around immune system processes such as  
389 immune response-activating signal transduction, positive regulation of immune system process,  
390 immune response-activating cell surface receptor signaling pathway, and regulation of immune  
391 response (Fig 8A). In addition to these immune system pathways, cell adhesion pathways came  
392 to the forefront, including cell-matrix adhesion, cytoskeleton organization, integrin-mediated  
393 signaling pathway, and positive regulation of cell adhesion. The 6,007 downregulated genes  
394 were enriched for 152 GO terms that clustered into networks for lipid catabolic process,  
395 oxidation-reduction process, lipid metabolic process, and cofactor metabolic process (Fig 8B).

**Fig 8. Functional enrichment of biological processes among the genes differentially expressed in the intestine of susceptible fish at 21 days post exposure to *Ceratonova shasta*.** Enriched gene ontology (GO) terms were grouped into functionally related nodes using the Cytoscope plugin ClueGO. Nodes are colored and grouped according to a related function and labelled by the most significant term of the group. Node size corresponds to the FDR-adjusted p-value of each GO term and is specific to each graph. The analysis was conducted separately on upregulated (A) and downregulated (B) genes.

396

## 397 Key genes expressed in response to *C. shasta* infection in 398 susceptible fish

399 Due to the large number of DEGs detected, only a subset of key genes identified in our  
400 analysis are presented in Table 5 and described below. The complete list of differential gene  
401 expression results and GO enrichment can be found in S2 Table.

**Table 5. Select immune genes that were differentially expressed in the intestine of susceptible steelhead at 14- and 21-days post exposure (dpe) to *Ceratonova shasta*.**

| Entrez Gene ID                 | Protein Product                                        | Log <sub>2</sub> -FC<br>14 dpe | Log <sub>2</sub> -FC<br>21 dpe |
|--------------------------------|--------------------------------------------------------|--------------------------------|--------------------------------|
| <b>Cytokines</b>               |                                                        |                                |                                |
| LOC100136024                   | interleukin-1 beta                                     | 3.3                            | -                              |
| LOC110536401                   | interleukin-1 beta-like                                | 9.0                            | 5.3                            |
|                                | il-6 interleukin-6 precursor                           | -                              | 5.9                            |
| LOC110496949                   | interleukin-6-like                                     | 7.5                            | 10.3                           |
|                                | il-8 putative CXCL8/interleukin-8                      | 2.6                            | 5.3                            |
| LOC110531606                   | CXCL8/interleukin-8-like                               | 1.9                            | 5.9                            |
|                                | tnf tumor necrosis factor                              | -                              | -                              |
|                                | mif macrophage migration inhibitory factor             | -2.0                           | -2.7                           |
| LOC110488642                   | macrophage migration inhibitory factor-like            | -2.2                           | -2.2                           |
|                                | csf-3 granulocyte colony-stimulating factor precursor  | 4.4                            | -                              |
|                                | csf3r granulocyte colony-stimulating factor receptor   | 1.6                            | 3.0                            |
| <b>Effector enzymes</b>        |                                                        |                                |                                |
| LOC110536463                   | granzyme A-like                                        | 5.2                            | 2.7                            |
| LOC110520655                   | granzyme B-like                                        | 3.9                            | 5.0                            |
| LOC110524258                   | granzyme-like protein 2                                | -                              | 2.9                            |
| LOC110531658                   | perforin-1-like                                        | 1.7                            | 1.4                            |
| LOC110536422                   | perforin-1-like                                        | -1.7                           | -1.2                           |
| LOC110538116                   | perforin-1-like                                        | 3.9                            | 7.4                            |
| LOC110500520                   | perforin-1-like                                        | -                              | 5.0                            |
| LOC100136187                   | cathelicidin antimicrobial peptide                     | 5.8                            | 8.3                            |
| LOC100136204                   | cathelicidin 1 precursor                               | 6.3                            | 7.5                            |
| LOC110523157                   | lysozyme C II                                          | -                              | 2.5                            |
| LOC110485102                   | lysozyme g-like                                        | -                              | 2.0                            |
| <b>Macrophages</b>             |                                                        |                                |                                |
| LOC110498289                   | arginase-2, mitochondrial-like                         | -                              | 4.1                            |
| LOC110506002                   | arginase-2, mitochondrial-like                         | 4.1                            | 4.0                            |
|                                | nos2 nitric oxide synthase, inducible                  | -                              | -                              |
| LOC110507147                   | nitric oxide synthase, inducible (Fragment)-like       | 4.7                            | -                              |
| LOC110536912                   | macrophage mannose receptor 1-like                     | -1.9                           | -6.7                           |
| LOC110500089                   | macrophage mannose receptor 1-like                     | -                              | -3.9                           |
| LOC110508265                   | macrophage mannose receptor 1-like                     | 6.3                            | 10.4                           |
| LOC110508267                   | macrophage mannose receptor 1-like                     | 5.5                            | 7.8                            |
| LOC110516203                   | macrophage mannose receptor 1-like                     | 5.0                            | 8.2                            |
| <b>T<sub>H1</sub> response</b> |                                                        |                                |                                |
|                                | ifng interferon gamma                                  | -                              | 6.6                            |
|                                | ifngamma2 interferon gamma 2                           | 5.4                            | 4.7                            |
|                                | ifngr1 interferon gamma receptor 1                     | 4.2                            | 3.5                            |
|                                | ifngr1 interferon gamma receptor alpha chain precursor | -                              | 1.6                            |
|                                | irf-8 interferon regulatory factor 8-like              | 3.7                            | 2.5                            |
|                                | il12b interleukin-12 beta chain precursor              | 2.1                            | 2.2                            |
| LOC110537792                   | interleukin-12 subunit beta-like                       | -                              | -4.0                           |
| LOC110524480                   | interleukin-12 receptor subunit beta-2-like            | 1.1                            | -1.3                           |
| LOC110524481                   | interleukin-12 receptor subunit beta-2-like            | 1.5                            | 2.9                            |
| LOC110511354                   | interleukin-18 receptor accessory protein-like         | -                              | 5.0                            |

|                                 |              |                                                                    |      |      |
|---------------------------------|--------------|--------------------------------------------------------------------|------|------|
|                                 | tbx21        | T-bet                                                              | 2.4  | 4.3  |
|                                 | stat1-1      | signal transducer/activator of transcription 1                     | 2.1  | 1.3  |
|                                 | LOC110520020 | signal transducer and activator of transcription 1-alpha/beta-like | 3.8  | 3.0  |
|                                 | LOC110501544 | signal transducer and activator of transcription 1-alpha/beta-like | 2.5  | 3.2  |
| <b>T<sub>H2</sub> response</b>  |              |                                                                    |      |      |
|                                 | il4/13a      | interleukin-4/13A precursor                                        | 5.4  | 5.0  |
|                                 | LOC110489171 | interleukin-4/13b1 precursor                                       | 6.1  | 5.0  |
|                                 | LOC110504551 | interleukin-4/13b2 precursor                                       | 7.9  | 7.7  |
|                                 | il17c1       | interleukin-17C1 precursor                                         | -    | -6.8 |
|                                 | LOC110492428 | interleukin-17 receptor C-like                                     | -    | -2.7 |
|                                 | socs3        | suppressor of cytokine signaling 3                                 | 4.1  | 4.1  |
|                                 | LOC110512513 | suppressor of cytokine signaling 3-like                            | 3.9  | 3.9  |
|                                 | LOC110500122 | transcription factor GATA-3-like                                   | -    | 2.2  |
| <b>T<sub>H17</sub> response</b> |              |                                                                    |      |      |
|                                 | il-17a       | interleukin-17A precursor                                          | -8.4 | -6.7 |
|                                 | LOC110504334 | interleukin-17A-like                                               | -    | -5.4 |
|                                 | LOC110529296 | interleukin-17A-like                                               | 1.4  | -    |
|                                 | il-17d       | interleukin-17 isoform D precursor                                 | -2.1 | -    |
|                                 | LOC110497745 | interleukin-17F-like                                               | -    | -2.0 |
|                                 | LOC110505720 | interleukin-17F-like                                               | -    | -8.3 |
|                                 | il17rd       | interleukin-17 receptor D                                          | -    | -1.2 |
|                                 | LOC110492331 | interleukin-17 receptor D-like                                     | 1.4  | 2.0  |
|                                 | il17r        | interleukin-17 receptor precursor                                  | -    | -2.4 |
|                                 | il-22        | interleukin-22 precursor                                           | -    | -3.1 |
|                                 | LOC110524663 | interferon regulatory factor 4-like                                | 1.3  | 1.4  |
|                                 | LOC110538194 | signal transducer and activator of transcription 3                 | -    | -1.2 |
|                                 | LOC110520784 | nuclear receptor ROR-gamma-like                                    | -    | -2.8 |
|                                 | LOC110535950 | nuclear receptor ROR-gamma-like                                    | -    | -2.4 |
| <b>T<sub>reg</sub> response</b> |              |                                                                    |      |      |
|                                 | il10         | interleukin-10 precursor                                           | 6.3  | 8.1  |
|                                 | il10b        | interleukin-10b protein precursor                                  | 4.8  | 6.0  |
|                                 | LOC100136774 | transforming growth factor beta-1                                  | 1.4  | 1.4  |
|                                 | LOC110534057 | transforming growth factor beta-1-like                             | 1.7  | 3.9  |
|                                 | tgfb11       | transforming growth factor beta-1-induced transcript 1 protein     | -    | 2.4  |
|                                 | foxp3-1      | forkhead box P3-1 protein                                          | -    | -1.9 |
|                                 | foxp3-2      | forkhead box P3-2 protein                                          | -    | -2.3 |
| <b>B cell response</b>          |              |                                                                    |      |      |
|                                 | LOC110522002 | Blimp-1/PR domain zinc finger protein 1-like                       | 4.9  | 7.5  |
|                                 | LOC110496128 | Blimp-1/PR domain zinc finger protein 1-like                       | 3.3  | 4.2  |
|                                 | LOC110485501 | B-cell receptor CD22-like                                          | 2.5  | 5.2  |
|                                 | LOC110538709 | immunoglobulin heavy variable 1-69-2-like                          | 5.7  | 8.0  |
|                                 | LOC110490545 | Ig kappa chain V region K29-213-like                               | 2.3  | 2.4  |
|                                 | LOC110535024 | immunoglobulin kappa light chain-like                              | 2.1  | 2.1  |

Non-significant differences in expression are marked as “-“.

402

## 403 Cytokines

404 The pro-inflammatory cytokine interleukin-1 beta (IL-1 $\beta$ ) was highly upregulated at 14-  
 405 and 21 dpe. IL-1 $\beta$  is a chemoattractant for leukocytes in fish and modulates the expression of  
 406 other chemokines including CXCL8/interleukin-8 [55], which was also upregulated at both  
 407 timepoints. Curiously, the pro-inflammatory cytokine TNA- $\alpha$  was not differentially expressed at  
 408 either timepoint despite the upregulation of other pro-inflammatory cytokines, including IL-1 $\beta$   
 409 which stimulates the production of TNA- $\alpha$ . Macrophage migration inhibitory factor (MIF) is a pro-

410 inflammatory cytokine that acts as a mediator of both innate and acquired immunity. It is  
411 implicated in resistance to bacterial pathogens and is released from macrophages after  
412 stimulation with LPS. Mice that lack MIF are more susceptible to leishmaniasis and cysticercosis  
413 and *in vivo* administration of recombinant MIF reduced the severity of *Leishmania major*  
414 pathogenesis in mice [56]. We observed downregulation of two MIF homologs at both 14 and 21  
415 dpe.

## 416 **Effector enzymes**

417 We detected low to high upregulation of several granzyme and perforin transcripts at 14-  
418 and 21 dpe. Cytotoxic T lymphocytes (CTLs) release these proteins in secretory granules to  
419 induce apoptosis of infected or damaged cells. The antimicrobial peptide cathelicidin was highly  
420 upregulated at both timepoints, while lysozyme was upregulated only at 21 dpe.

## 421 **Macrophage activation and polarization**

422 Macrophages at the site of inflammation polarize into M1 or M2 phenotypes. M1  
423 polarization is associated with the T<sub>H1</sub> response and the presence IFN- $\gamma$  and induces  
424 macrophages to express the enzyme nitric oxide synthase (NOS) leading to the production of  
425 reactive nitrogen species for pathogen clearance. M2 polarization is driven by the T<sub>H2</sub> response  
426 and the presence IL-4/13. M2 macrophages are associated with wound healing and the  
427 expression of the arginase enzyme. We observed upregulation of NOS at 14 dpe but not at 21  
428 dpe. The opposite was true for arginase, which was only upregulated at 21 dpe.

429 Macrophage mannose receptor 1 (MCR1) is a transmembrane glycoprotein belonging to  
430 the C-type lectin family. In addition to scavenging certain hormones and glycoproteins, it also  
431 recognizes a variety of pathogens including influenza virus, *Yersinia pestis*, and *Leishmania*

432 species [57]. Ten homologs of MCR1 were differentially expressed at 14- or 21 dpe and were  
433 among the most highly induced immune genes at 21 dpe.

### 434 **GTPase IMAP family members**

435 A total of 15 GIMAP proteins were upregulated at 14 dpe, including two homologs of  
436 GTPase IMAP family member 4-like which were the two most highly upregulated immune genes  
437 at this timepoint (10.4 and 9.0 log<sub>2</sub>-FC). The same two homologs were also the most highly  
438 upregulated genes (22.0 and 7.6 log<sub>2</sub>-FC) in the gills of resistant fish at 1 dpe. However, they  
439 were not differentially expressed in susceptible fish at 21 dpe. At 21 dpe, only 5 GIMAPs  
440 proteins were upregulated, with GTPase IMAP family member 7-like having the highest increase  
441 in expression (4.1 log<sub>2</sub>-FC).

### 442 **Activated T-cells**

443 CD4<sup>+</sup> T helper cells (T<sub>H</sub> cells) are an important wing of the adaptive immune response  
444 that differentiate into one of several effector subsets (T<sub>H1</sub>, T<sub>H2</sub>, T<sub>H17</sub>, and T<sub>reg</sub>) based on the  
445 cytokine signals they receive. These effector cells, in turn, secrete their own distinct profile of  
446 cytokines that help orchestrate the immune response. Among the genes differentially expressed  
447 in response to *C. shasta* infection, signature genes for each subset were identified to provide  
448 insight into the T cell response (Table 6).

449 Interferon gamma (IFN- $\gamma$ ), the signature T<sub>H1</sub> cytokine, was highly upregulated at both 14-  
450 and 21 dpe along with its cognate receptor and T-bet, the master transcriptional regulator of T<sub>H1</sub>  
451 differentiation. Only one gene related to interleukin-12, the primary driver of T<sub>H1</sub> differentiation,  
452 was upregulated at 14 dpe (interleukin-12 subunit beta-like, 2.3 Log<sub>2</sub>-FC). The gene was  
453 similarly upregulated at 21 dpe, along with interleukin-12 alpha and beta chains.



454 Interleukin-4/13 is the primary cytokine produced by T<sub>H2</sub> cells and drives alternative  
455 macrophage activation and type 2 inflammation. Moderate upregulation of interleukin-4/13A  
456 precursor was seen at 14- and 21 dpe. The master transcriptional regulator of T<sub>H2</sub> differentiation,  
457 GATA-3, was only upregulated at 21 dpe.

458 Downregulation of several genes involved in the T<sub>H17</sub> response was observed at 14- and  
459 21 dpe. Most significant of these was interleukin-17A precursor, and interleukin-17F-like. Two  
460 copies of nuclear receptor ROR-gamma, the putative master transcriptional regulator of T<sub>H17</sub>,  
461 were downregulated at 21 dpe.

462 Little evidence of a strong regulatory T cell response was seen at either 14- or 21 dpe.  
463 FOXP3, the master transcriptional regulator for T<sub>reg</sub> cells, was downregulated at 21 dpe.  
464 Transforming growth factor beta transcripts were mildly upregulated at both timepoints.  
465 Interleukin-10, which is classically associated with T<sub>reg</sub>, was highly upregulated at 14- and 21  
466 dpe, however, it can be produced by numerous different myeloid and lymphoid cells during an  
467 infection [58]. This lack of an observable T<sub>reg</sub> response may be due to the significant  
468 upregulation of interleukin-6 seen at both timepoints, as interleukin-6 is known to inhibit T<sub>reg</sub>  
469 conversion in humans and mice [59,60].

## 470 **B cell response**

471 Numerous genes involved in the B cell response and production of immunoglobulins  
472 were upregulated at 14 dpe, and both the number of genes and the magnitude of the  
473 upregulation increased at 21 dpe. Among these were the transcription factor Blimp-1, which is  
474 required for the maturation of B cells into Ig-secreting cells, B cell receptor CD22, and several  
475 heavy and light chain transcripts.

## 476 **Innate immune receptors**

477 Toll-like receptors (TLRs) are innate immune receptors that recognize conserved  
478 pathogen-associated molecular patterns. We observed upregulation of six different TLRs at 14-  
479 or 21 dpe, including eleven homologs of TLR13. In mice, TLR13 recognizes a conserved  
480 bacterial 23S ribosomal RNA sequence, a function that appears to be conserved in teleost fish  
481 [61]. Two copies of TLR8, which recognizes viral single-stranded RNA, were upregulated at  
482 both timepoints, and one copy of TLR1, which recognizes bacterial lipoprotein, and TLR22.  
483 TLR22 is a fish-specific TLR and has been shown to be induced after viral, bacterial, or  
484 ectoparasite challenge [62]. TLR3 and TLR7, which recognize viral RNA, were upregulated at  
485 14 dpe. Although they were different homologs than those upregulated in resistant fish, 18  
486 putative NOD-like receptors were upregulated at 14 dpe and 11 at 21 dpe. We also observed  
487 substantial upregulation of C-type lectins, with 16 upregulated at 14 dpe and 20 upregulated at  
488 21 dpe.

## 489 **Cell adhesion**

490 Genes involved in cell-to-cell contact and the formation of the intestinal barrier were  
491 among the most transcriptionally active at both timepoints, with the majority of transcripts being  
492 upregulated. At 14 dpe, this included 10 claudins, 19 integrins, 1 fibronectin, 5 fermitin family  
493 homologs, 8 gap junction proteins, and 17 cadherins. This continued at 21 dpe with 23 claudins,  
494 42 integrins, 11 fibronectins, 7 fermitin family homologs, 15 gap junction proteins and 36  
495 cadherins. Additionally, in terms of statistical significance, the actin binding protein beta-parvin  
496 was the most significant DEG at 21 dpe ( $p_{adj} = 9.97e-232$ ,  $\log_2\text{-FC} = 7.6$ ).

497

## 498 **Validation of DEGs using RT-qPCR**

499 Four immune genes (*IFN- $\gamma$* , *TNF- $\alpha$* , *IL-10*, *IL-1 $\beta$* ) found to be differentially expressed by  
500 RNA-seq were assayed using quantitative reverse transcription PCR (RT-qPCR) to validate the

**Fig 9. qPCR validation of RNA-seq results.** Quantitative reverse transcription PCR (RT-qPCR) validation of four immune genes (*IFN- $\gamma$* , *TNF- $\alpha$* , *IL-10*, *IL-1 $\beta$* ) found to be significantly differentially expression by RNA-seq at day 7 in the gills. The X-axis shows the gene and phenotype assayed and the Y-axis shows the relative  $\log_2$ (Fold Change) between fish exposed to *Ceratonova shasta* and their respective control. Error bars indicate the standard deviation of Cq values between biological replicates.

501 results and confirm the observed downregulation of immune genes. Fold changes from RT-  
502 qPCR are compared with those from RNA-seq in Fig 9 and support the results we obtained.

503

## 504 Discussion

505 We used RNA-seq to study the early transcriptomic response of resistant and  
506 susceptible steelhead infected with the myxozoan parasite *C. shasta*. Comparative  
507 transcriptomics revealed that both phenotypes had a suppression of the interferon gamma  
508 signaling pathway in the gills at 1 dpe. The response of the two phenotypes quickly diverges  
509 after that. In the intestine at 7 dpe, resistant fish had effectively contained the parasite and  
510 several immune genes were upregulated in this tissue. Susceptible fish, on the other hand, had  
511 no observable response to parasite proliferation in the intestine at this time. Parasite replication  
512 in susceptible fish continued exponentially at 14- and 21 dpe, which coincided with an intense,  
513 yet ineffective immune response and the breakdown of the intestinal structure.

### 514 Immunosuppression at the portal of entry (gills)

515 Given the markedly different resistance of these two fish stocks to *C. shasta* induced  
516 pathology, the overall transcriptomic response in the gills was surprisingly similar, with a  
517 downregulation of immune genes in both phenotypes. We observed a suppression of the innate

518 immune response, particularly the IFN- $\gamma$  signaling pathway which is the primary immune  
519 pathway activated later in the infection. This may reflect a parasite-induced immunosuppression  
520 that aids in initial invasion of the host. Immunosuppression is a well-known method of immune  
521 evasion for human parasites [63], and an immunosuppressed state has been observed in other  
522 fish-parasite systems, including infections by other myxozoans. A microarray analysis of  
523 gilthead sea bream exposed to the myxozoan *Enteromyxum leei* revealed that successfully  
524 parasitized fish were characterized by a global downregulation of genes involved in the immune  
525 and acute phase response [64]. Studies of rainbow trout infected with the related  
526 malacosporean *Tetracapsuloides bryosalmonae*, the causative agent of proliferative kidney  
527 disease, revealed suppression of phagocytic activity and oxidative burst [65], and a  
528 dysregulated T-helper and B cell response [66,67]. The transcriptomic response of Atlantic  
529 salmon affected by amoebic gill disease, caused by a protozoan parasite, is also associated  
530 with downregulation of immune genes, including those related to MHC I and IFN- $\gamma$  [68,69].

## 531 **Potential recognition of the parasite by resistant fish**

532 Although the majority of immune genes were downregulated in the gills of resistant fish,  
533 two copies of GTPase IMAP family member 4-like were the most highly upregulated genes at  
534 this timepoint. Additionally, the immune receptors NLRC5 and Fc receptor-like protein 5 were  
535 also upregulated. The upregulation of innate immune receptors, including NLRC 5 which was  
536 also upregulated in the intestine of resistant fish, suggests that specific recognition of *C. shasta*  
537 may be occurring in these fish. While this may not offer protection at the portal of entry, it may  
538 enable a more rapid immune response to the parasite at the intestine, or during its migration  
539 there. This would explain why resistant fish had a much lower infection prevalence and intensity  
540 in the intestine (Fig 3).

## 541 **GIMAPs may mediate resistance to *C. shasta***

542 As noted above, the two most highly upregulated genes in the gills of resistant fish were  
543 two homologs of GTPase IMAP family member 4-like, a protein involved in T-lymphocyte  
544 development. Intriguingly, the same two homologs were the most highly upregulated immune  
545 genes in the intestine of susceptible fish at 14 dpe. If these genes are involved in mediating  
546 resistance to *C. shasta*, then their delayed expression in susceptible fish could explain the  
547 delayed immune response observed in these fish. How these genes might mediate resistance is  
548 unclear, as their precise function remains unknown. One possible mechanism may be through  
549 mediating the effects of IFN- $\gamma$ , which orchestrates a plethora of cellular pathways and regulates  
550 the expression of hundreds of genes. In mice, IFN- $\gamma$  driven pathogen resistance is dependent  
551 on certain families of GTPases [70,71]. Resistance to *Toxoplasma gondii* requires IFN- $\gamma$  and it  
552 was recently shown that GIMAP proteins mediate resistance to *T. gondii* infection in the  
553 resistant Lewis rat strain, with overexpression of GIMAPs in rat macrophages showing that  
554 GIMAP 4 had the highest inhibitory effect [72].

## 555 **Differences in parasite recognition in the intestine of** 556 **resistant and susceptible fish**

557 The lack of a transcriptomic response, including any upregulation of immune genes, in  
558 the intestine of susceptible fish at 7 dpe was surprising given the high parasite load present in  
559 this tissue at that time (Fig 3), and that initial invasion would have occurred 2-3 days prior [9].  
560 This would indicate that susceptible fish are unable to recognize the parasite invading the  
561 intestine or the subsequent proliferation. In contrast, resistant fish were able to either prevent  
562 parasite establishment in the intestine or minimize parasite proliferation once there. Consistent  
563 with this, we observed upregulation of several immune genes in resistant fish. Immunoglobulin  
564 kappa constant, which encodes the constant region of immunoglobulin light chains, was mildly  
565 upregulated. Fucoslectin 6, an F-type lectin that binds fucose was highly upregulated at this

566 timepoint. Lectins are carbohydrate-binding proteins that play a key role in the innate immune  
567 response by recognizing exposed glycans on the surface on pathogens [73]. We also observed  
568 upregulation of the same homolog of NLRC 5 that was upregulated in the gills of resistant fish at  
569 1 dpe. NOD-, LRR- and CARD-containing (NLRC) proteins are a group of pattern recognition  
570 receptors that play a role in both innate and adaptive immune responses by inducing  
571 transcription of pro-inflammatory and MHC class I genes, and triggering formation of the  
572 “inflammasome”, a multi-protein complex that results in programmed cell death [74,75]. NLRCs  
573 are known to play a role in the mucosal immune system of the mammalian gut and are highly  
574 expressed by macrophages and epithelial cells in the intestine [76]. Numerous studies of teleost  
575 fish have demonstrated the presence of NLRCs that are induced upon immune stimulation or  
576 exposure to a pathogen [77–85]. With the generation of several high quality teleost genomes, it  
577 is evident that a shared expansion of NLRC genes has occurred in teleosts, suggesting a more  
578 prominent role in the immune system [86]. Considering that myxozoans predate the evolution of  
579 fish and have been co-evolving with their acquired vertebrate hosts for hundreds of millions of  
580 years [87], it seems plausible that fish would have evolved innate immune receptors capable of  
581 recognizing conserved motifs on these ubiquitous pathogens.

## 582 **Susceptible fish exhibit a vigorous yet ineffective T<sub>H1</sub>** 583 **response**

584 Evidence of a strong T<sub>H1</sub> response was observed in susceptible fish at both 14 and 21  
585 dpe, with upregulation of IFN- $\gamma$ , its cognate receptor, and T-bet, the master transcriptional  
586 regulator of T<sub>H1</sub> differentiation. GO enrichment analysis also revealed that genes involved in the  
587 interferon-gamma signaling pathway were over-represented among the upregulated genes.  
588 Upregulation of IFN- $\gamma$  has been observed in previous studies of Chinook and rainbow trout  
589 exposed to *C. shasta* [23,29,31] and appears to play a pivotal and conserved role in the fish

590 response to myxozoan infections. Studies of resistant and susceptible rainbow trout exposed to  
591 the myxozoan *Myxobolus cerebralis*, the causative agent of whirling disease, have shown a  
592 strong induction of IFN- $\gamma$  and interferon regulatory factor 1 in both strains, with IFN- $\gamma$  being  
593 upregulated earlier in the infection in resistant fish [88,89]. Olive flounder (*Paralichthys*  
594 *olivaceus*) infected with the myxozoan *Kudoa septempunctata* had elevated levels of IFN- $\gamma$  in  
595 their trunk muscles [90]. IFN- $\gamma$  was also found to be upregulated in turbot during the early stages  
596 of enteromyxosis caused by *E. scophthalmi* [91]. Most interestingly, when gilthead sea bream  
597 (*Sparus aurata* L.) were exposed to *E. leei*, only the non-parasitized fish had elevated levels of  
598 IFN- $\gamma$ , suggesting it helps mediate resistant to the pathogen [64].

599         If the IFN- $\gamma$  pathway is a primary way of defending against myxozoan infections, it raises  
600 the question as to why it's activation in susceptible fish offered no apparent protection against  
601 *C. shasta* pathogenesis. Bjork et al. [23] suggest that upregulation of the potent anti-  
602 inflammatory cytokine IL-10 in susceptible fish may attenuate their inflammatory response and  
603 subsequent ability to control parasite proliferation. In concordance with that, we observed  
604 marked upregulation of several IL-10 homologs at both timepoints. The ability of IL-10 to  
605 attenuate IFN- $\gamma$  driven parasite clearance by inhibiting the activity of macrophages, T<sub>H1</sub> cells,  
606 and natural killer cells is well-documented [58,92,93]. These immunosuppressive effects are  
607 exploited by certain pathogens, including koi herpesvirus, which encodes and expresses a  
608 functional IL-10 homolog [94]. Dysregulation of IL-10 production, in terms of timing or over-  
609 expression, may explain why susceptible fish fail to inhibit parasite proliferation despite  
610 upregulation of IFN- $\gamma$ .

611

612 **The breakdown of the intestinal barrier in susceptible fish**

613           The mucosal surface of the intestine must function as a site of nutrient absorption while  
614 acting as a barrier against the systemic spread of microorganisms, both commensal and  
615 pathogenic. The main physical component of the intestinal barrier is formed by a continuous  
616 monolayer of cells tightly attached to each other by tight junctions, adherens junctions, and  
617 desmosomes. Breakdown of this barrier can result in the systemic spread of harmful bacteria  
618 and molecules. *C. shasta* reaches the intestine via blood vessels and then migrates through the  
619 tissue layers to release spores into the intestinal lumen. As recently shown by Alama-Bermejo  
620 et al. [27], *C. shasta* genotype II is highly mobile and has strong adhesive affinities for the  
621 glycoprotein components of the extracellular matrix (ECM), resulting in massive interaction and  
622 disruption of the host intestinal ECM. We found that genes related to the ECM and cell adhesion  
623 showed an intense amount of transcriptional activity in susceptible fish at both 14- and 21 dpe.  
624 This aligns with the breakdown of the intestinal structure we observed in histological sections of  
625 these fish (Fig 2A-C). Disrupted cell adhesion and cell-to-cell contact also interferes with  
626 intercellular communication through gap junctions, which is critical for maintaining tissue  
627 structure and homeostasis. Additionally, it can also lead to anoikis, a form of programmed cell  
628 death that occurs upon detachment from the ECM. The inability of susceptible fish to overcome  
629 *C. shasta* induced breakdown of the ECM would explain why we don't observe an organized  
630 tissue response to the infection (granulomas, fibrosis), as observed in resistant fish.

631           It is likely that this disruption of the host intestinal barrier and ECM in susceptible fish  
632 also lead to the dissemination of bacteria into the intestinal tissue, as evidenced by the  
633 upregulation of numerous toll-like receptors that recognize bacterial motifs, as well as  
634 cathelicidins, lysozyme, and complement proteins. Pathway level analysis showed the overall  
635 immune response transitioned from being primarily IFN- $\gamma$  driven at 14 dpe (Fig 7A), to a more  
636 mixed immune response at 21 dpe (Fig 8A). This likely influx of bacteria coincided with the  
637 downregulation of T<sub>H17</sub> markers IL-17A, IL-17F, and ROR-gamma. T<sub>H17</sub> cells play a critical role in



638 the response to bacterial pathogens at the gut mucosal surface, and the expression of IL-17A  
639 and IL-17F generally increases after exposure to an intestinal pathogen [95–97]. It should also  
640 be noted that IL-17F was also downregulated in the gills of susceptible fish at 1 dpe. Whether  
641 this represents a maladaptive host response, or a pathogenic strategy remains to be  
642 determined. However, it has been shown that certain pathogens actively interfere with the host  
643 IL-17 pathway. The mucosal pathogen *Candida albicans* inhibits IL-17 production in human  
644 hosts, which is the primary pathway for elimination of the fungus [98], and the intracellular  
645 bacteria *Coxiella burnetii* blocks IL-17 signaling in human macrophages [99].

646 In addition to the likely dissemination of bacteria caused by the breakdown of the  
647 intestinal barrier, the hosts ability to acquire nutrients and produce energy became severely  
648 compromised. The downregulated genes at 14- and 21 dpe primarily clustered around  
649 metabolic and energy producing pathways (Fig 7B, 8B). This occurs while the host is trying to  
650 mount a massive immune response, an energetically costly endeavor. This highlights the uphill  
651 battle that susceptible fish face: their delayed response to *C. shasta* means they must overcome  
652 an evolutionarily well-adapted pathogen that has replicated extensively, while doing so under  
653 metabolic stress and with a compromised intestinal structure.

## 654 **Conclusions**

655 The primary goal of this study was to determine if susceptible fish recognized *C. shasta*  
656 during the initial stages of infection. It is clear from the results at 7 dpe that they fail to recognize  
657 the parasite invading the intestine. We specifically used RNA-seq with a high number of  
658 replicates to give us the widest possible chance of seeing any genes that respond to the  
659 infection, but none were detected. Whether susceptible fish recognize *C. shasta* in the gills  
660 remains unclear. We detected a transcriptomic response to the infection; however, this may be  
661 actively induced by the parasite and not by host recognition. The observation that both the

662 sympatric (resistant) and allopatric (susceptible) hosts exhibited a similar gill response, and that  
663 susceptible fish had no response in the intestine at 7 dpe, supports the idea that the  
664 transcriptomic response is driven by the parasite and not by specific host recognition.

665         The second goal of this study was to identify putative *C. shasta* resistance genes,  
666 particularly innate immune receptors that could initiate the immune response. We observed  
667 upregulation of a NOD-like receptor whose elevated expression coincided with initial invasion of  
668 the gills and intestine. We also observed strong induction of two homologs of GTPase IMAP  
669 family member 4 in the gills of resistant fish and later on in the intestine of susceptible fish. Our  
670 laboratory is currently in the process of creating a QTL cross of *C. shasta*-resistant and  
671 susceptible *O. mykiss* to identify the genomic loci responsible for resistance. Locating these  
672 putative resistance genes within the identified loci would offer robust support for their  
673 involvement in *C. shasta* resistance and provide a potential marker for rapid identification of  
674 resistant fish stocks.

675         While not an initial goal of this study, we characterized the intestinal response of  
676 susceptible fish during the middle and late stages of *C. shasta* infection. As expected from  
677 previous studies of *C. shasta* and other myxozoan infections, the immune response was  
678 characteristic of an IFN- $\gamma$  driven T<sub>H1</sub> response. This response failed to offer any protection  
679 though, possibly due to excessive or mistimed expression of IL-10, or the suppression of the  
680 T<sub>H17</sub> response. Comparing the intestinal response of susceptible fish to that of resistant fish with  
681 a similar *C. shasta* burden would help answer this, and identify what a successful immune  
682 response to the parasite looks like once it has invaded the intestine and begun to replicate.

683         *C. shasta* is an important pathogen of salmonid fish in the Pacific Northwest and has had  
684 an outsized impact on the Klamath River Basin fisheries. As for most myxozoans, what the  
685 parasite does within the host and how the host responds has largely remained a black box. The  
686 work presented here helps shed light on this process. More broadly, it improves our

687 understanding of myxozoan-host interactions and in conjunction with other studies, may allow  
688 general patterns to emerge regarding the fish host's response. One such pattern may be the  
689 conserved adaption of IFN- $\gamma$  to combat myxozoan infections. This immediately raises the  
690 question of how a pathway that is classically associated with the immune response to  
691 intracellular pathogens mediates resistance to extracellular myxozoan parasites. Finally, we  
692 have identified putative resistance genes that can provide a starting point for future functional  
693 studies.

## 694 **Supporting information**

695 S1 Table. Primer sequences for qPCR assay

696 S2 Table. Complete list of differential gene expression results and corresponding GO  
697 enrichment.

## 698 **Acknowledgments**

699 The authors would like to thank the staff at the John L. Fryer Aquatic Animal Health  
700 Laboratory for assistance with fish husbandry, and Dr. Stephen Atkinson and Dr. Rich Holt for  
701 assistance with fish sampling. We also thank the Oregon Department of Fish and Wildlife, in  
702 particular the Round Butte and Alsea hatcheries for supplying fish used in this study. We would  
703 also like to acknowledge Dr. Julie Alexander, Ryan Craig, and Milan Sengthep for their labor-  
704 intensive maintenance of the annelid cultures that enable laboratory challenges with *C. shasta*.

## 705 **Author Contributions**

706 **Conceptualization:** DB, JB.

707 **Data curation:** DB.

708 **Formal analysis:** DB.

709 **Funding acquisition:** JB.

710 **Investigation:** DB.

711 **Methodology:** DB, JB.

712 **Project administration:** JB.

713 **Resources:** DB, JB.

714 **Software:** DB.

715 **Supervision:** JB.

716 **Validation:** DB.

717 **Writing - original draft:** DB.

718 **Writing - review & editing:** JB.

## 719 **References**

- 720 1. Bartholomew JL, Whipple MJ, Stevens DG, Fryer JL. The Life Cycle of *Ceratomyxa shasta*, a  
721 Myxosporean Parasite of Salmonids, Requires a Freshwater Polychaete as an Alternate Host. J  
722 Parasitol. 1997;83: 859. doi:10.2307/3284281
- 723 2. Stinson MET, Atkinson SD, Bartholomew JL. Widespread distribution of *Ceratonova shasta*  
724 (cnidaria:myxosporea) genotypes indicates both evolutionary adaptation to its salmonid fish hosts.  
725 J Parasitol. 2018. doi:10.1645/18-79
- 726 3. True K, Voss A, Foott JS. Myxosporean Parasite (*Ceratonova shasta* and *Parvicapsula minibicornis*)  
727 Prevalence of Infection in Klamath River Basin Juvenile Chinook Salmon, April - July 2015. U.S. Fish  
728 and Wildlife Service; 2016 p. 34.
- 729 4. Ratliff D. E. *Ceratomyxa shasta*: Epizootiology in Chinook Salmon of Central Oregon. Trans Am Fish  
730 Soc. 1981;110: 507–513. doi:10.1577/1548-8659(1981)110<507:CS>2.0.CO;2

- 731 5. Stinson MET, Bartholomew JL. Predicted Redistribution of *Ceratomyxa shasta* Genotypes with  
732 Salmonid Passage in the Deschutes River, Oregon. *J Aquat Anim Health*. 2012;24: 274–280.  
733 doi:10.1080/08997659.2012.716012
- 734 6. Bartholomew JL, Ray E, Torell B, Whipple MJ, Heidel JR. Monitoring *Ceratomyxa shasta* infection  
735 during a hatchery rearing cycle: comparison of molecular, serological and histological methods. *Dis*  
736 *Aquat Organ*. 2004;62: 85–92. doi:10.3354/dao062085
- 737 7. Fujiwara M, Mohr MS, Greenberg A, Foott JS, Bartholomew JL. Effects of Ceratomyxosis on  
738 Population Dynamics of Klamath Fall-Run Chinook Salmon. *Trans Am Fish Soc*. 2011;140: 1380–  
739 1391. doi:10.1080/00028487.2011.621811
- 740 8. Hallett SL, Ray RA, Hurst CN, Holt RA, Buckles GR, Atkinson SD, et al. Density of the Waterborne  
741 Parasite *Ceratomyxa shasta* and Its Biological Effects on Salmon. *Appl Environ Microbiol*. 2012;78:  
742 3724–3731. doi:10.1128/AEM.07801-11
- 743 9. Bjork SJ, Bartholomew JL. Invasion of *Ceratomyxa shasta* (Myxozoa) and comparison of migration  
744 to the intestine between susceptible and resistant fish hosts. *Int J Parasitol*. 2010;40: 1087–1095.  
745 doi:10.1016/j.ijpara.2010.03.005
- 746 10. Ray RA, Rossignol PA, Bartholomew JL. Mortality threshold for juvenile Chinook salmon  
747 *Oncorhynchus tshawytscha* in an epidemiological model of *Ceratomyxa shasta*. *Dis Aquat Organ*.  
748 2010;93: 63–70. doi:10.3354/dao02281
- 749 11. Bjork S, Bartholomew J. Effects of *Ceratomyxa shasta* dose on a susceptible strain of rainbow trout  
750 and comparatively resistant Chinook and coho salmon. *Dis Aquat Organ*. 2009;86: 29–37.  
751 doi:10.3354/dao02092
- 752 12. Buchanan DV, Sanders JE, Zinn JL, Fryer JL. Relative Susceptibility of Four Strains of Summer  
753 Steelhead to Infection by *Ceratomyxa shasta*. *Trans Am Fish Soc*. 1983;112: 541–543.  
754 doi:10.1577/1548-8659(1983)112<541:RSOFSO>2.0.CO;2
- 755 13. Hemmingsen AR, Holt RA, Ewing RD, McIntyre JD. Susceptibility of Progeny from Crosses among  
756 Three Stocks of Coho Salmon to Infection by *Ceratomyxa shasta*. *Trans Am Fish Soc*. 1986;115:  
757 492–495. doi:10.1577/1548-8659(1986)115<492:SOPFCA>2.0.CO;2
- 758 14. Ibarra AM, Hedrick RP, Gall GAE. Inheritance of susceptibility to *Ceratomyxa shasta* (Myxozoa) in  
759 rainbow trout and the effect of length of exposure on the liability to develop ceratomyxosis.  
760 *Aquaculture*. 1992;104: 217–229. doi:10.1016/0044-8486(92)90205-Y
- 761 15. Ibarra AM, Hedrick RP, Gall GAE. Genetic analysis of rainbow trout susceptibility to the  
762 myxosporean, *Ceratomyxa shasta*. *Aquaculture*. 1994;120: 239–262. doi:10.1016/0044-  
763 8486(94)90082-5
- 764 16. Bartholomew J, Whipple MJ, Campton D. Inheritance of resistance to *Ceratomyxa shasta* in  
765 progeny from crosses between high- and low-susceptibility strains of rainbow trout (*Oncorhynchus*  
766 *mykiss*). *Bull Natl Res Inst Aquac*. 2001;5: 71–75.

- 767 17. Nichols K, Bartholomew J, Thorgaard G. Mapping multiple genetic loci associated with *Ceratomyxa*  
768 *shasta* resistance in *Oncorhynchus mykiss*. *Dis Aquat Organ*. 2003;56: 145–154.  
769 doi:10.3354/dao056145
- 770 18. Ratliff DE. *Ceratomyxa shasta*: Longevity, Distribution, Timing, and Abundance of the Infective  
771 Stage In Central Oregon. *Can J Fish Aquat Sci*. 1983;40: 1622–1632. doi:10.1139/f83-188
- 772 19. Bartholomew JL, Smith CE, Rohovec JS, Fryer JL. Characterization of a host response to the  
773 myxosporean parasite, *Ceratomyxa shasta* (Noble), by histology, scanning electron microscopy and  
774 immunological techniques. *J Fish Dis*. 1989;12: 509–522.
- 775 20. Foott JS, Stone R. Effect of water temperature on non-specific immune function and Ceratomyxosis  
776 in juvenile chinook salmon and steelhead from the Klamath River. *Calif Fish Game*. 2004;90: 71–84.
- 777 21. Hurst CN, Wong P, Hallett SL, Ray RA, Bartholomew JL. Transmission and Persistence of *Ceratonova*  
778 *shasta* Genotypes in Chinook Salmon. *J Parasitol*. 2014;100: 773–777. doi:10.1645/13-482.1
- 779 22. Ibarra A, Gall G, Hedrick R. Susceptibility of two strains of rainbow trout *Oncorhynchus mykiss* to  
780 experimentally induced infections with the myxosporean *Ceratomyxa Shasta*. *Dis Aquat Organ*.  
781 1991;10: 191–194. doi:10.3354/dao010191
- 782 23. Bjork SJ, Zhang Y-A, Hurst CN, Alonso-Naveiro ME, Alexander JD, Sunyer JO, et al. Defenses of  
783 susceptible and resistant Chinook salmon (*Onchorhynchus tshawytscha*) against the myxozoan  
784 parasite *Ceratomyxa shasta*. *Fish Shellfish Immunol*. 2014;37: 87–95. doi:10.1016/j.fsi.2013.12.024
- 785 24. Foott JS, Stone R, Wiseman E, True K, Nichols K. Longevity of *Ceratomyxa shasta* and *Parvicapsula*  
786 *minibicornis* Actinospore Infectivity in the Klamath River. *J Aquat Anim Health*. 2007;19: 77–83.  
787 doi:10.1577/H06-017.1
- 788 25. Atkinson SD, Bartholomew JL. Disparate infection patterns of *Ceratomyxa shasta* (Myxozoa) in  
789 rainbow trout (*Oncorhynchus mykiss*) and Chinook salmon (*Oncorhynchus tshawytscha*) correlate  
790 with internal transcribed spacer-1 sequence variation in the parasite. *Int J Parasitol*. 2010;40: 599–  
791 604. doi:10.1016/j.ijpara.2009.10.010
- 792 26. Atkinson SD, Bartholomew JL. Spatial, temporal and host factors structure the *Ceratomyxa shasta*  
793 (Myxozoa) population in the Klamath River basin. *Infect Genet Evol*. 2010;10: 1019–1026.  
794 doi:10.1016/j.meegid.2010.06.013
- 795 27. Alama-Bermejo G, Holzer AS, Bartholomew JL. Myxozoan Adhesion and Virulence: *Ceratonova*  
796 *shasta* on the Move. *Microorganisms*. 2019;7: 397. doi:10.3390/microorganisms7100397
- 797 28. Bjork SJ, Bartholomew JL. The effects of water velocity on the *Ceratomyxa shasta* infectious cycle. *J*  
798 *Fish Dis*. 2009;32: 131–142. doi:10.1111/j.1365-2761.2008.00964.x
- 799 29. Taggart-Murphy L. The Role of the Mucosal Immunoglobulin IgT and Inflammatory Cytokines in  
800 *Ceratonova shasta* Infections in Rainbow Trout. M. Sc. Thesis, Oregon State University. 2018.
- 801 30. Zhang Y-A, Salinas I, Li J, Parra D, Bjork S, Xu Z, et al. IgT, a primitive immunoglobulin class  
802 specialized in mucosal immunity. *Nat Immunol*. 2010;11: 827–835. doi:10.1038/ni.1913

- 803 31. Hurst CN, Alexander JD, Dolan BP, Jia L, Bartholomew JL. Outcome of within-host competition  
804 demonstrates that parasite virulence doesn't equal success in a myxozoan model system. *Int J*  
805 *Parasitol Parasites Wildl.* 2019;9: 25–35. doi:10.1016/j.ijppaw.2019.03.008
- 806 32. Zhao Y, Liu X, Sato H, Zhang Q, Li A, Zhang J. RNA-seq analysis of local tissue of *Carassius auratus*  
807 *gibelio* with pharyngeal myxobolosis: Insights into the pharyngeal mucosal immune response in a  
808 fish-parasite dialogue. *Fish Shellfish Immunol.* 2019;94: 99–112. doi:10.1016/j.fsi.2019.08.076
- 809 33. Sitjà-Bobadilla A. Fish immune response to Myxozoan parasites. *Parasite.* 2008;15: 420–425.  
810 doi:10.1051/parasite/2008153420
- 811 34. Chiaramonte LV, Ray RA, Corum RA, Soto T, Hallett SL, Bartholomew JL. Klamath River Thermal  
812 Refuge Provides Juvenile Salmon Reduced Exposure to the Parasite *Ceratonova shasta*. *Trans Am*  
813 *Fish Soc.* 2016;145: 810–820. doi:10.1080/00028487.2016.1159612
- 814 35. Atkinson SD, Bartholomew JL, Rouse GW. The invertebrate host of salmonid fish parasites  
815 *Ceratonova shasta* and *Parvicapsula minibicornis* (Cnidaria: Myxozoa), is a novel *fabriciid* annelid,  
816 *Manayunkia occidentalis* sp. nov. (Sabellida: Fabriciidae). *Zootaxa.* 2020;4751: 310–320.  
817 doi:10.11646/zootaxa.4751.2.6
- 818 36. Hallett S, Bartholomew J. Application of a real-time PCR assay to detect and quantify the myxozoan  
819 parasite *Ceratomyxa shasta* in river water samples. *Dis Aquat Organ.* 2006;71: 109–118.  
820 doi:10.3354/dao071109
- 821 37. Reeb SG. Plasticity of diel and circadian activity rhythms in fishes. *Rev Fish Biol Fish.* 2002;12:  
822 349–371. doi:10.1023/A:1025371804611
- 823 38. BBTools. In: DOE Joint Genome Institute [Internet]. [cited 18 Sep 2019]. Available:  
824 <https://jgi.doe.gov/data-and-tools/bbtools/>
- 825 39. Babraham Bioinformatics - FastQC A Quality Control tool for High Throughput Sequence Data.  
826 [cited 18 Sep 2019]. Available: <https://www.bioinformatics.babraham.ac.uk/projects/fastqc/>
- 827 40. Kim D, Langmead B, Salzberg SL. HISAT: a fast spliced aligner with low memory requirements. *Nat*  
828 *Methods.* 2015;12: 357–360. doi:10.1038/nmeth.3317
- 829 41. Berthelot C, Brunet F, Chalopin D, Juanchich A, Bernard M, Noël B, et al. The rainbow trout  
830 genome provides novel insights into evolution after whole-genome duplication in vertebrates. *Nat*  
831 *Commun.* 2014;5. doi:10.1038/ncomms4657
- 832 42. Li H, Handsaker B, Wysoker A, Fennell T, Ruan J, Homer N, et al. The Sequence Alignment/Map  
833 format and SAMtools. *Bioinformatics.* 2009;25: 2078–2079. doi:10.1093/bioinformatics/btp352
- 834 43. Anders S, Pyl PT, Huber W. HTSeq—a Python framework to work with high-throughput sequencing  
835 data. *Bioinformatics.* 2015;31: 166–169. doi:10.1093/bioinformatics/btu638
- 836 44. R: The R Project for Statistical Computing. [cited 18 Sep 2019]. Available: [https://www.r-](https://www.r-project.org/)  
837 [project.org/](https://www.r-project.org/)

- 838 45. Love MI, Huber W, Anders S. Moderated estimation of fold change and dispersion for RNA-seq  
839 data with DESeq2. *Genome Biol.* 2014;15: 550. doi:10.1186/s13059-014-0550-8
- 840 46. Conesa A, Götz S, García-Gómez JM, Terol J, Talón M, Robles M. Blast2GO: a universal tool for  
841 annotation, visualization and analysis in functional genomics research. *Bioinformatics.* 2005;21:  
842 3674–3676. doi:10.1093/bioinformatics/bti610
- 843 47. Bairoch A, Apweiler R. The SWISS-PROT protein sequence database and its supplement TrEMBL in  
844 2000. *Nucleic Acids Res.* 2000;28: 45–48.
- 845 48. Shannon P, Markiel A, Ozier O, Baliga NS, Wang JT, Ramage D, et al. Cytoscape: A Software  
846 Environment for Integrated Models of Biomolecular Interaction Networks. *Genome Res.* 2003;13:  
847 2498–2504. doi:10.1101/gr.1239303
- 848 49. Bindea G, Mlecnik B, Hackl H, Charoentong P, Tosolini M, Kirilovsky A, et al. ClueGO: a Cytoscape  
849 plug-in to decipher functionally grouped gene ontology and pathway annotation networks.  
850 *Bioinformatics.* 2009;25: 1091–1093. doi:10.1093/bioinformatics/btp101
- 851 50. Blighe K, Rana S, Lewis M. EnhancedVolcano: Publication-ready volcano plots with enhanced  
852 colouring and labeling. 2018.
- 853 51. Schmittgen TD, Livak KJ. Analyzing real-time PCR data by the comparative CT method. *Nat Protoc.*  
854 2008;3: 1101–1108. doi:10.1038/nprot.2008.73
- 855 52. Filén S, Lahesmaa R. GIMAP Proteins in T-Lymphocytes. *J Signal Transduct.* 2010;2010.  
856 doi:10.1155/2010/268589
- 857 53. Aiba Y, Oh-hora M, Kiyonaka S, Kimura Y, Hijikata A, Mori Y, et al. Activation of RasGRP3 by  
858 phosphorylation of Thr-133 is required for B cell receptor-mediated Ras activation. *Proc Natl Acad  
859 Sci U S A.* 2004;101: 16612–16617. doi:10.1073/pnas.0407468101
- 860 54. Fossale E, Wolf P, Espinola JA, Lubicz-Nawrocka T, Teed AM, Gao H, et al. Membrane trafficking  
861 and mitochondrial abnormalities precede subunit c deposition in a cerebellar cell model of juvenile  
862 neuronal ceroid lipofuscinosis. *BMC Neurosci.* 2004;5: 57. doi:10.1186/1471-2202-5-57
- 863 55. Secombes CJ, Wang T, Bird S. The interleukins of fish. *Dev Comp Immunol.* 2011;35: 1336–1345.  
864 doi:10.1016/j.dci.2011.05.001
- 865 56. Calandra T, Roger T. Macrophage migration inhibitory factor: a regulator of innate immunity. *Nat  
866 Rev Immunol.* 2003;3: 791–800. doi:10.1038/nri1200
- 867 57. Azad AK, Rajaram MVS, Schlesinger LS. Exploitation of the Macrophage Mannose Receptor (CD206)  
868 in Infectious Disease Diagnostics and Therapeutics. *J Cytol Mol Biol.* 2014;1. doi:10.13188/2325-  
869 4653.1000003
- 870 58. Couper KN, Blount DG, Riley EM. IL-10: The Master Regulator of Immunity to Infection. *J Immunol.*  
871 2008;180: 5771–5777. doi:10.4049/jimmunol.180.9.5771



- 872 59. Korn T, Mitsdoerffer M, Croxford AL, Awasthi A, Dardalhon VA, Galileos G, et al. IL-6 controls Th17  
873 immunity in vivo by inhibiting the conversion of conventional T cells into Foxp3+ regulatory T cells.  
874 Proc Natl Acad Sci. 2008;105: 18460–18465. doi:10.1073/pnas.0809850105
- 875 60. Goodman WA, Levine AD, Massari JV, Sugiyama H, McCormick TS, Cooper KD. IL-6 Signaling in  
876 Psoriasis Prevents Immune Suppression by Regulatory T Cells. J Immunol. 2009;183: 3170–3176.  
877 doi:10.4049/jimmunol.0803721
- 878 61. Wang Y, Bi X, Chu Q, Xu T. Discovery of toll-like receptor 13 exists in the teleost fish: Miiuy croaker  
879 (Perciformes, Sciaenidae). Dev Comp Immunol. 2016;61: 25–33. doi:10.1016/j.dci.2016.03.005
- 880 62. Panda RP, Chakrapani V, Patra SK, Saha JN, Jayasankar P, Kar B, et al. First evidence of comparative  
881 responses of Toll-like receptor 22 (TLR22) to relatively resistant and susceptible Indian farmed  
882 carps to *Argulus siamensis* infection. Dev Comp Immunol. 2014;47: 25–35.  
883 doi:10.1016/j.dci.2014.06.016
- 884 63. Zambrano-Villa S, Rosales-Borjas D, Carrero JC, Ortiz-Ortiz L. How protozoan parasites evade the  
885 immune response. Trends Parasitol. 2002;18: 272–278. doi:10.1016/S1471-4922(02)02289-4
- 886 64. Davey GC, Caldusch-Giner JA, Houeix B, Talbot A, Sitjà-Bobadilla A, Prunet P, et al. Molecular  
887 profiling of the gilthead sea bream (*Sparus aurata* L.) response to chronic exposure to the  
888 myxosporean parasite *Enteromyxum leei*. Mol Immunol. 2011;48: 2102–2112.  
889 doi:10.1016/j.molimm.2011.07.003
- 890 65. Chilmonczyk S, Monge D, Kinkelin PD. Proliferative kidney disease: cellular aspects of the rainbow  
891 trout, *Oncorhynchus mykiss* (Walbaum), response to parasitic infection. J Fish Dis. 2002;25: 217–  
892 226. doi:10.1046/j.1365-2761.2002.00362.x
- 893 66. Gorgoglione B, Wang T, Secombes CJ, Holland JW. Immune gene expression profiling of  
894 Proliferative Kidney Disease in rainbow trout *Oncorhynchus mykiss* reveals a dominance of anti-  
895 inflammatory, antibody and T helper cell-like activities. Vet Res. 2013;44: 55. doi:10.1186/1297-  
896 9716-44-55
- 897 67. Abos B, Estensoro I, Perdiguero P, Faber M, Hu Y, Díaz Rosales P, et al. Dysregulation of B Cell  
898 Activity During Proliferative Kidney Disease in Rainbow Trout. Front Immunol. 2018;9.  
899 doi:10.3389/fimmu.2018.01203
- 900 68. Wynne JW, O’Sullivan MG, Cook MT, Stone G, Nowak BF, Lovell DR, et al. Transcriptome Analyses  
901 of Amoebic Gill Disease-affected Atlantic Salmon (*Salmo salar*) Tissues Reveal Localized Host Gene  
902 Suppression. Mar Biotechnol. 2008;10: 388–403. doi:10.1007/s10126-007-9075-4
- 903 69. Young ND, Cooper GA, Nowak BF, Koop BF, Morrison RN. Coordinated down-regulation of the  
904 antigen processing machinery in the gills of amoebic gill disease-affected Atlantic salmon (*Salmo*  
905 *salar* L.). Mol Immunol. 2008;45: 2581–2597. doi:10.1016/j.molimm.2007.12.023
- 906 70. Boehm U, Guethlein L, Klamp T, Ozbek K, Schaub A, Fütterer A, et al. Two Families of GTPases  
907 Dominate the Complex Cellular Response to IFN- $\gamma$ . J Immunol. 1998;161: 6715–6723.

- 908 71. Pilla-Moffett D, Barber MF, Taylor GA, Coers J. Interferon-inducible GTPases in host resistance,  
909 inflammation and disease. *J Mol Biol.* 2016;428: 3495–3513. doi:10.1016/j.jmb.2016.04.032
- 910 72. Kim CY, Zhang X, Witola WH. Small GTPase Immunity-Associated Proteins Mediate Resistance to  
911 *Toxoplasma gondii* Infection in Lewis Rat. *Infect Immun.* 2018;86. doi:10.1128/IAI.00582-17
- 912 73. Vasta GR, Amzel LM, Bianchet MA, Cammarata M, Feng C, Saito K. F-Type Lectins: A Highly  
913 Diversified Family of Fucose-Binding Proteins with a Unique Sequence Motif and Structural Fold,  
914 Involved in Self/Non-Self-Recognition. *Front Immunol.* 2017;8. doi:10.3389/fimmu.2017.01648
- 915 74. Zhao Y, Shao F. NLRC5: a NOD-like receptor protein with many faces in immune regulation. *Cell*  
916 *Res.* 2012;22: 1099–1101. doi:10.1038/cr.2012.83
- 917 75. Benkő S, Kovács EG, Hezel F, Kufer TA. NLRC5 Functions beyond MHC I Regulation—What Do We  
918 Know So Far? *Front Immunol.* 2017;8. doi:10.3389/fimmu.2017.00150
- 919 76. Chassaing B, Kumar M, Baker MT, Singh V, Vijay-Kumar M. Mammalian Gut Immunity. *Biomed J.*  
920 2014;37: 246–258. doi:10.4103/2319-4170.130922
- 921 77. Laing KJ, Purcell MK, Winton JR, Hansen JD. A genomic view of the NOD-like receptor family in  
922 teleost fish: identification of a novel NLR subfamily in zebrafish. *BMC Evol Biol.* 2008;8: 42.  
923 doi:10.1186/1471-2148-8-42
- 924 78. Sha Z, Abernathy JW, Wang S, Li P, Kucuktas H, Liu H, et al. NOD-like subfamily of the nucleotide-  
925 binding domain and leucine-rich repeat containing family receptors and their expression in channel  
926 catfish. *Dev Comp Immunol.* 2009;33: 991–999. doi:10.1016/j.dci.2009.04.004
- 927 79. Chang M, Wang T, Nie P, Zou J, Secombes CJ. Cloning of two rainbow trout nucleotide-binding  
928 oligomerization domain containing 2 (NOD2) splice variants and functional characterization of the  
929 NOD2 effector domains. *Fish Shellfish Immunol.* 2011;30: 118–127. doi:10.1016/j.fsi.2010.09.014
- 930 80. Hou Q-H, Yi S-B, Ding X, Zhang H-X, Sun Y, Zhang Y, et al. Differential expression analysis of nuclear  
931 oligomerization domain proteins NOD1 and NOD2 in orange-spotted grouper (*Epinephelus*  
932 *coioides*). *Fish Shellfish Immunol.* 2012;33: 1102–1111. doi:10.1016/j.fsi.2012.08.015
- 933 81. Park SB, Hikima J, Suzuki Y, Ohtani M, Nho SW, Cha IS, et al. Molecular cloning and functional  
934 analysis of nucleotide-binding oligomerization domain 1 (NOD1) in olive flounder, *Paralichthys*  
935 *olivaceus*. *Dev Comp Immunol.* 2012;36: 680–687. doi:10.1016/j.dci.2011.11.007
- 936 82. Rajendran KV, Zhang J, Liu S, Kucuktas H, Wang X, Liu H, et al. Pathogen recognition receptors in  
937 channel catfish: I. Identification, phylogeny and expression of NOD-like receptors. *Dev Comp*  
938 *Immunol.* 2012;37: 77–86. doi:10.1016/j.dci.2011.12.005
- 939 83. Swain B, Basu M, Samanta M. Molecular cloning and characterization of nucleotide binding and  
940 oligomerization domain-1 (NOD1) receptor in the Indian Major Carp, rohu (*Labeo rohita*), and  
941 analysis of its inductive expression and down-stream signalling molecules following ligands  
942 exposure and Gram-negative bacterial infections. *Fish Shellfish Immunol.* 2012;32: 899–908.

- 943 84. Li C, Zhang Y, Wang R, Lu J, Nandi S, Mohanty S, et al. RNA-seq analysis of mucosal immune  
944 responses reveals signatures of intestinal barrier disruption and pathogen entry following  
945 *Edwardsiella ictaluri* infection in channel catfish, *Ictalurus punctatus*. Fish Shellfish Immunol.  
946 2012;32: 816–827. doi:10.1016/j.fsi.2012.02.004
- 947 85. Xie J, Hodgkinson JW, Katzenback BA, Kovacevic N, Belosevic M. Characterization of three Nod-like  
948 receptors and their role in antimicrobial responses of goldfish (*Carassius auratus L.*) macrophages  
949 to *Aeromonas salmonicida* and *Mycobacterium marinum*. Dev Comp Immunol. 2013;39: 180–187.  
950 doi:10.1016/j.dci.2012.11.005
- 951 86. Tørresen OK, Briec MSO, Solbakken MH, Sørhus E, Nederbragt AJ, Jakobsen KS, et al. Genomic  
952 architecture of haddock (*Melanogrammus aeglefinus*) shows expansions of innate immune genes  
953 and short tandem repeats. BMC Genomics. 2018;19: 240. doi:10.1186/s12864-018-4616-y
- 954 87. Holzer AS, Bartošová-Sojtková P, Born-Torrijos A, Lövy A, Hartigan A, Fiala I. The joint evolution of  
955 the Myxozoa and their alternate hosts: A cnidarian recipe for success and vast biodiversity. Mol  
956 Ecol. 2018;27: 1651–1666. doi:10.1111/mec.14558
- 957 88. Baerwald MR, Welsh AB, Hedrick RP, May B. Discovery of genes implicated in whirling disease  
958 infection and resistance in rainbow trout using genome-wide expression profiling. BMC Genomics.  
959 2008;9: 37. doi:10.1186/1471-2164-9-37
- 960 89. Baerwald MR. Temporal expression patterns of rainbow trout immune-related genes in response  
961 to *Myxobolus cerebralis* exposure. Fish Shellfish Immunol. 2013;35: 965–971.  
962 doi:10.1016/j.fsi.2013.07.008
- 963 90. Jang Y-H, Subramanian D, Won S-H, Heo M-S. Immune response of olive flounder (*Paralichthys*  
964 *olivaceus*) infected with the myxosporean parasite *Kudoa septempunctata*. Fish Shellfish Immunol.  
965 2017;67: 172–178. doi:10.1016/j.fsi.2017.06.019
- 966 91. Ronza P, Robledo D, Bermúdez R, Losada AP, Pardo BG, Sitjà-Bobadilla A, et al. RNA-seq analysis of  
967 early enteromyxosis in turbot (*Scophthalmus maximus*): new insights into parasite invasion and  
968 immune evasion strategies. Int J Parasitol. 2016;46: 507–517. doi:10.1016/j.ijpara.2016.03.007
- 969 92. Gazzinelli RT, Oswald IP, James SL, Sher A. IL-10 inhibits parasite killing and nitrogen oxide  
970 production by IFN-gamma-activated macrophages. J Immunol. 1992;148: 1792–1796.
- 971 93. Netea MG, Suttmuller R, Hermann C, Graaf CAAV der, Meer JWMV der, Krieken JH van, et al. Toll-  
972 Like Receptor 2 Suppresses Immunity against *Candida albicans* through Induction of IL-10 and  
973 Regulatory T Cells. J Immunol. 2004;172: 3712–3718. doi:10.4049/jimmunol.172.6.3712
- 974 94. Sunarto A, Liongue C, McColl KA, Adams MM, Bulach D, Crane MSJ, et al. Koi Herpesvirus Encodes  
975 and Expresses a Functional Interleukin-10. J Virol. 2012;86: 11512–11520. doi:10.1128/JVI.00957-  
976 12
- 977 95. Blaschitz C, Raffatellu M. Th17 Cytokines and the Gut Mucosal Barrier. J Clin Immunol. 2010;30:  
978 196–203. doi:10.1007/s10875-010-9368-7

- 979 96. Kolls JK, Khader SA. The role of Th17 cytokines in primary mucosal immunity. *Cytokine Growth*  
980 *Factor Rev.* 2010;21: 443–448. doi:10.1016/j.cytogfr.2010.11.002
- 981 97. Zhang H, Shen B, Wu H, Gao L, Liu Q, Wang Q, et al. Th17-like immune response in fish mucosal  
982 tissues after administration of live attenuated *Vibrio anguillarum* via different vaccination routes.  
983 *Fish Shellfish Immunol.* 2014;37: 229–238. doi:10.1016/j.fsi.2014.02.007
- 984 98. Cheng S-C, van de Veerdonk F, Smeekens S, Joosten LAB, van der Meer JWM, Kullberg B-J, et al.  
985 *Candida albicans* Dampens Host Defense by Downregulating IL-17 Production. *J Immunol.*  
986 2010;185: 2450–2457. doi:10.4049/jimmunol.1000756
- 987 99. Clemente TM, Mulye M, Justis AV, Nallandhighal S, Tran TM, Gilk SD. *Coxiella burnetii* Blocks  
988 Intracellular Interleukin-17 Signaling in Macrophages. *Infect Immun.* 2018;86.  
989 doi:10.1128/IAI.00532-18
- 990

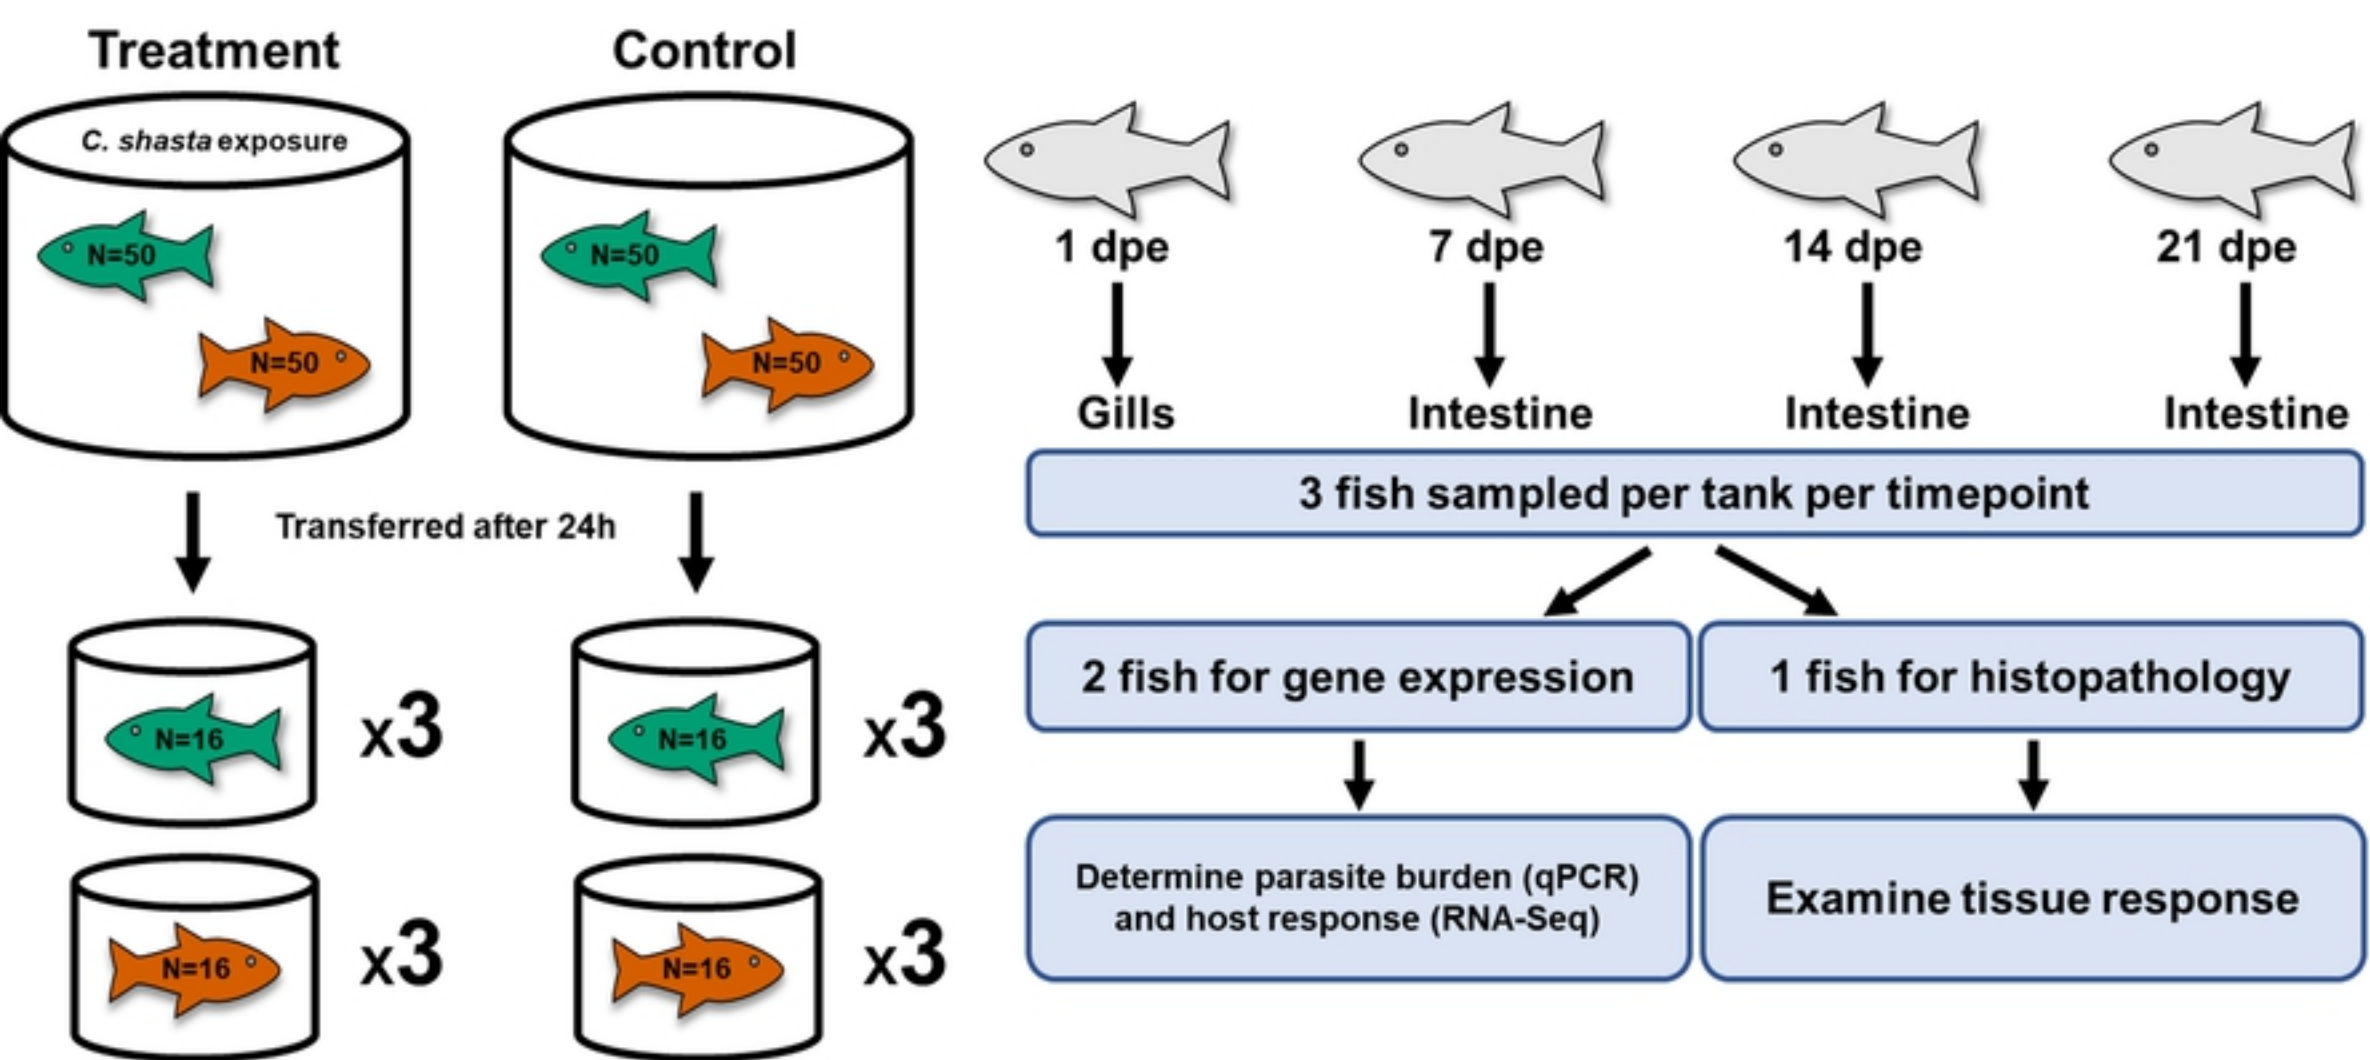

Figure 1

**A) 7 dpe**

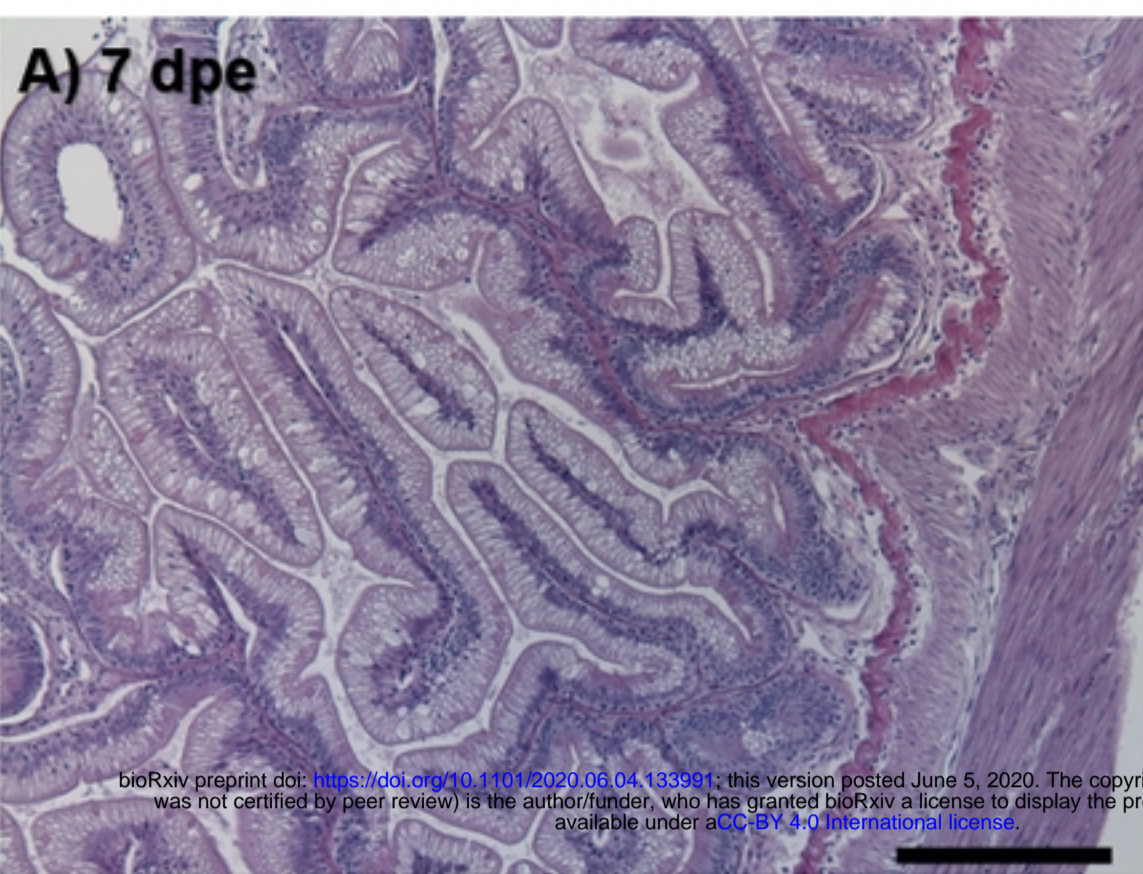

**D) 7 dpe**

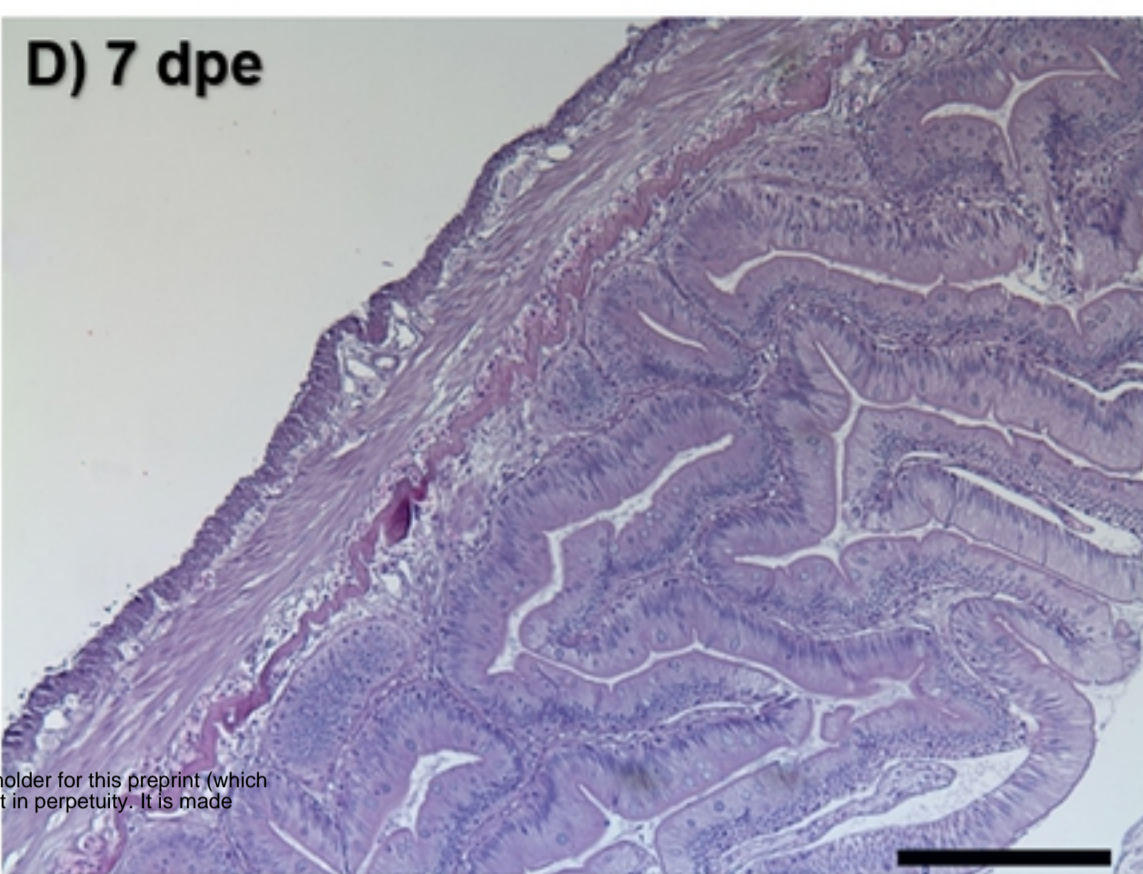

bioRxiv preprint doi: <https://doi.org/10.1101/2020.06.04.133991>; this version posted June 5, 2020. The copyright holder for this preprint (which was not certified by peer review) is the author/funder, who has granted bioRxiv a license to display the preprint in perpetuity. It is made available under aCC-BY 4.0 International license.

**B) 14 dpe**

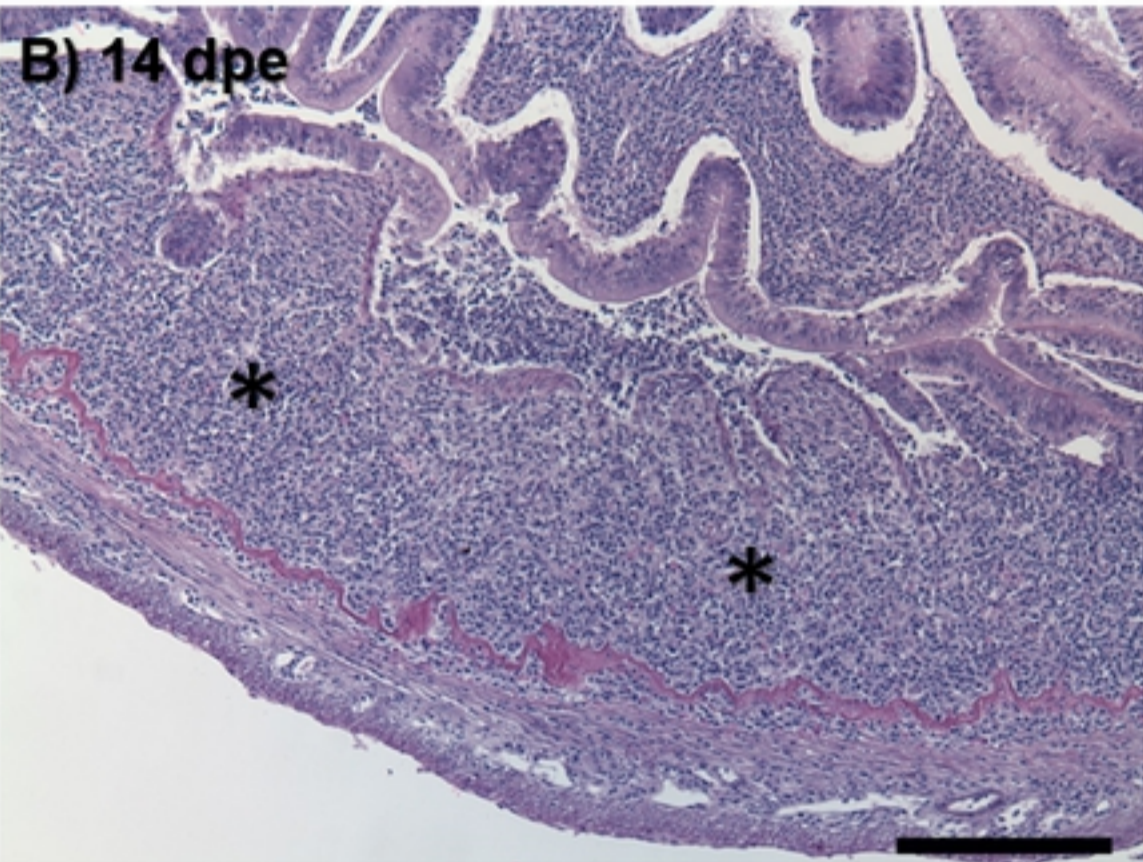

**E) 21 dpe**

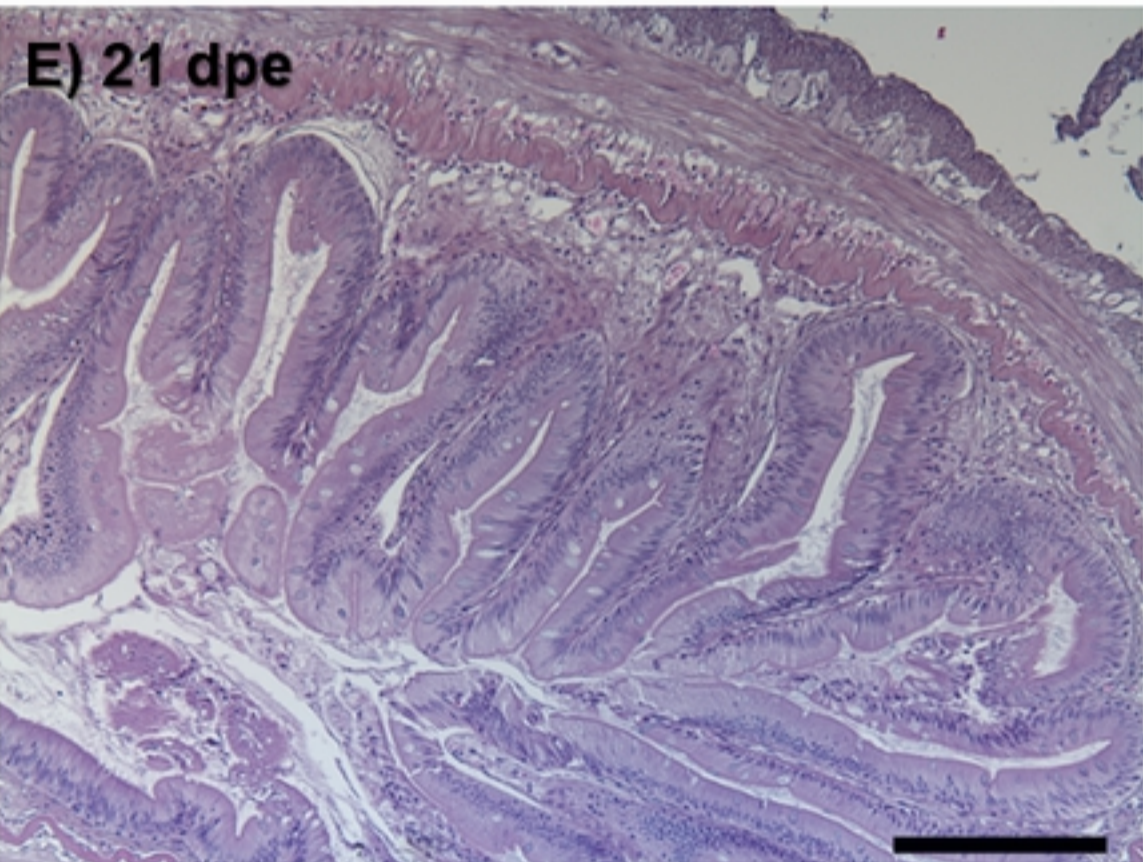

**C) 21 dpe**

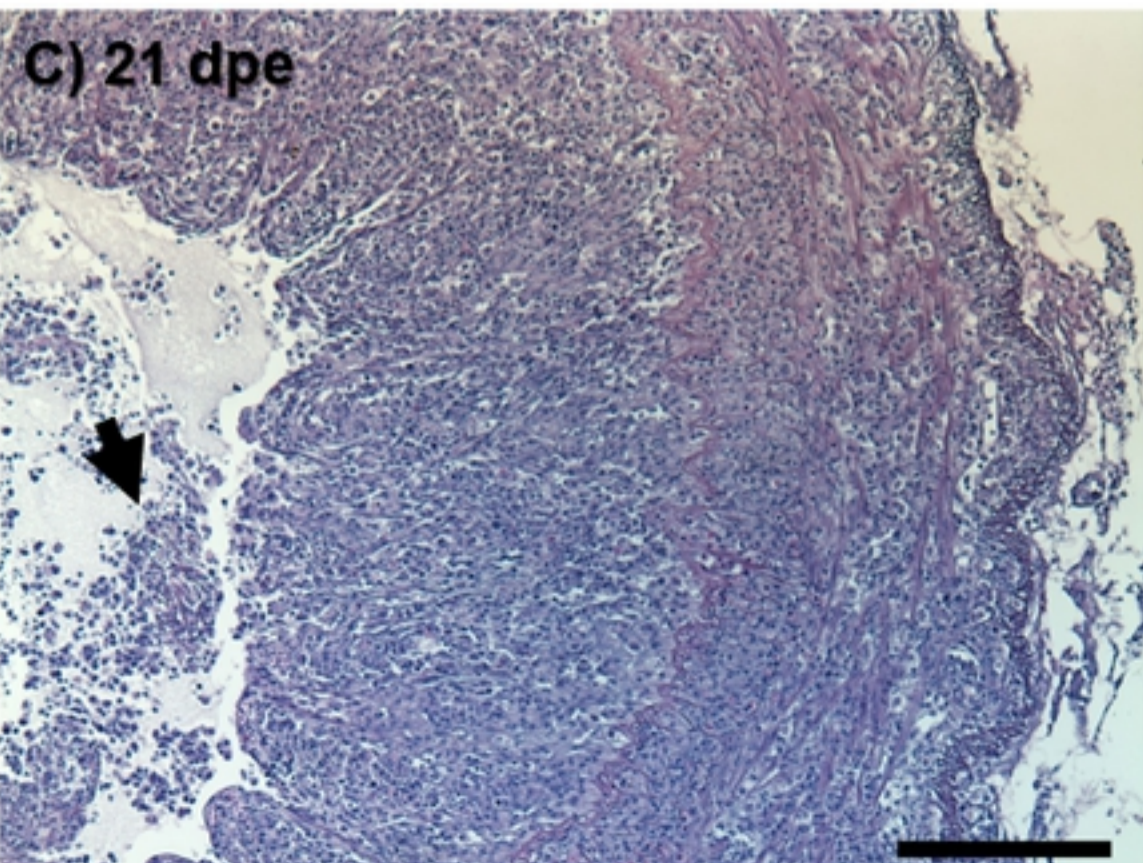

**F) 21 dpe**

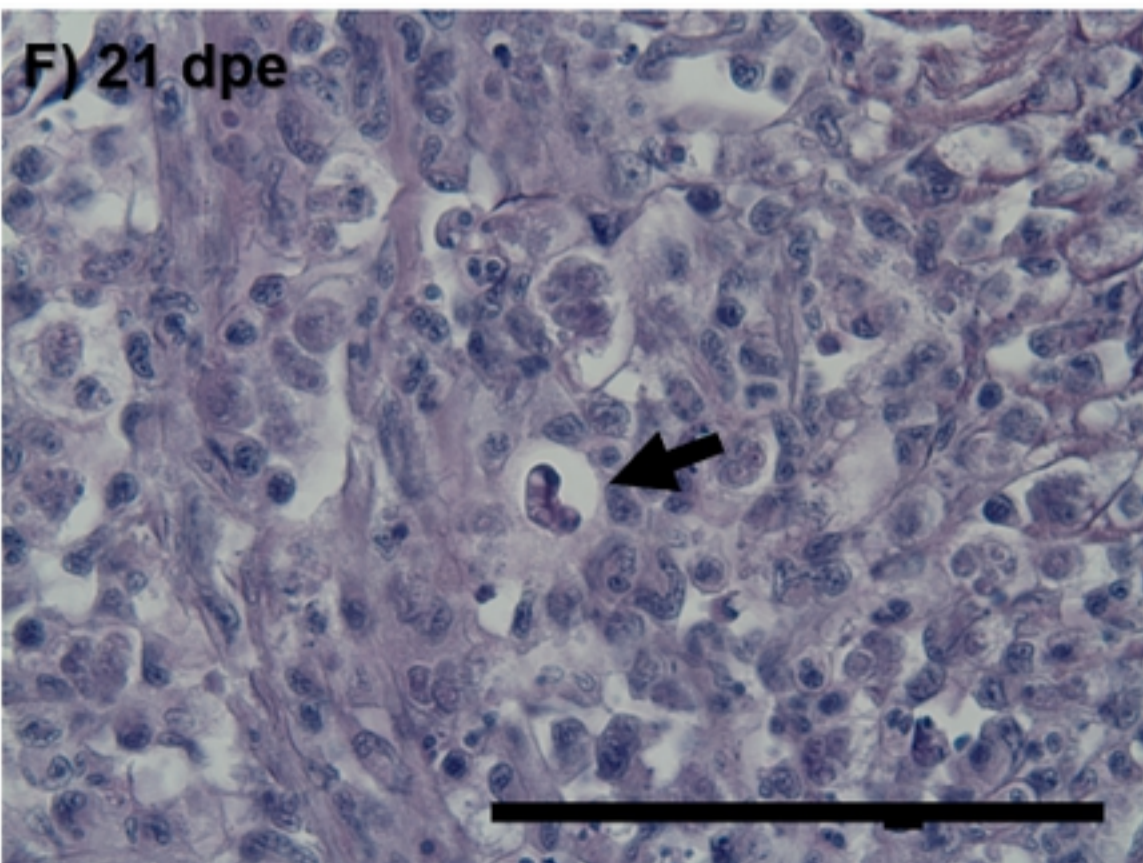

**Figure 2**

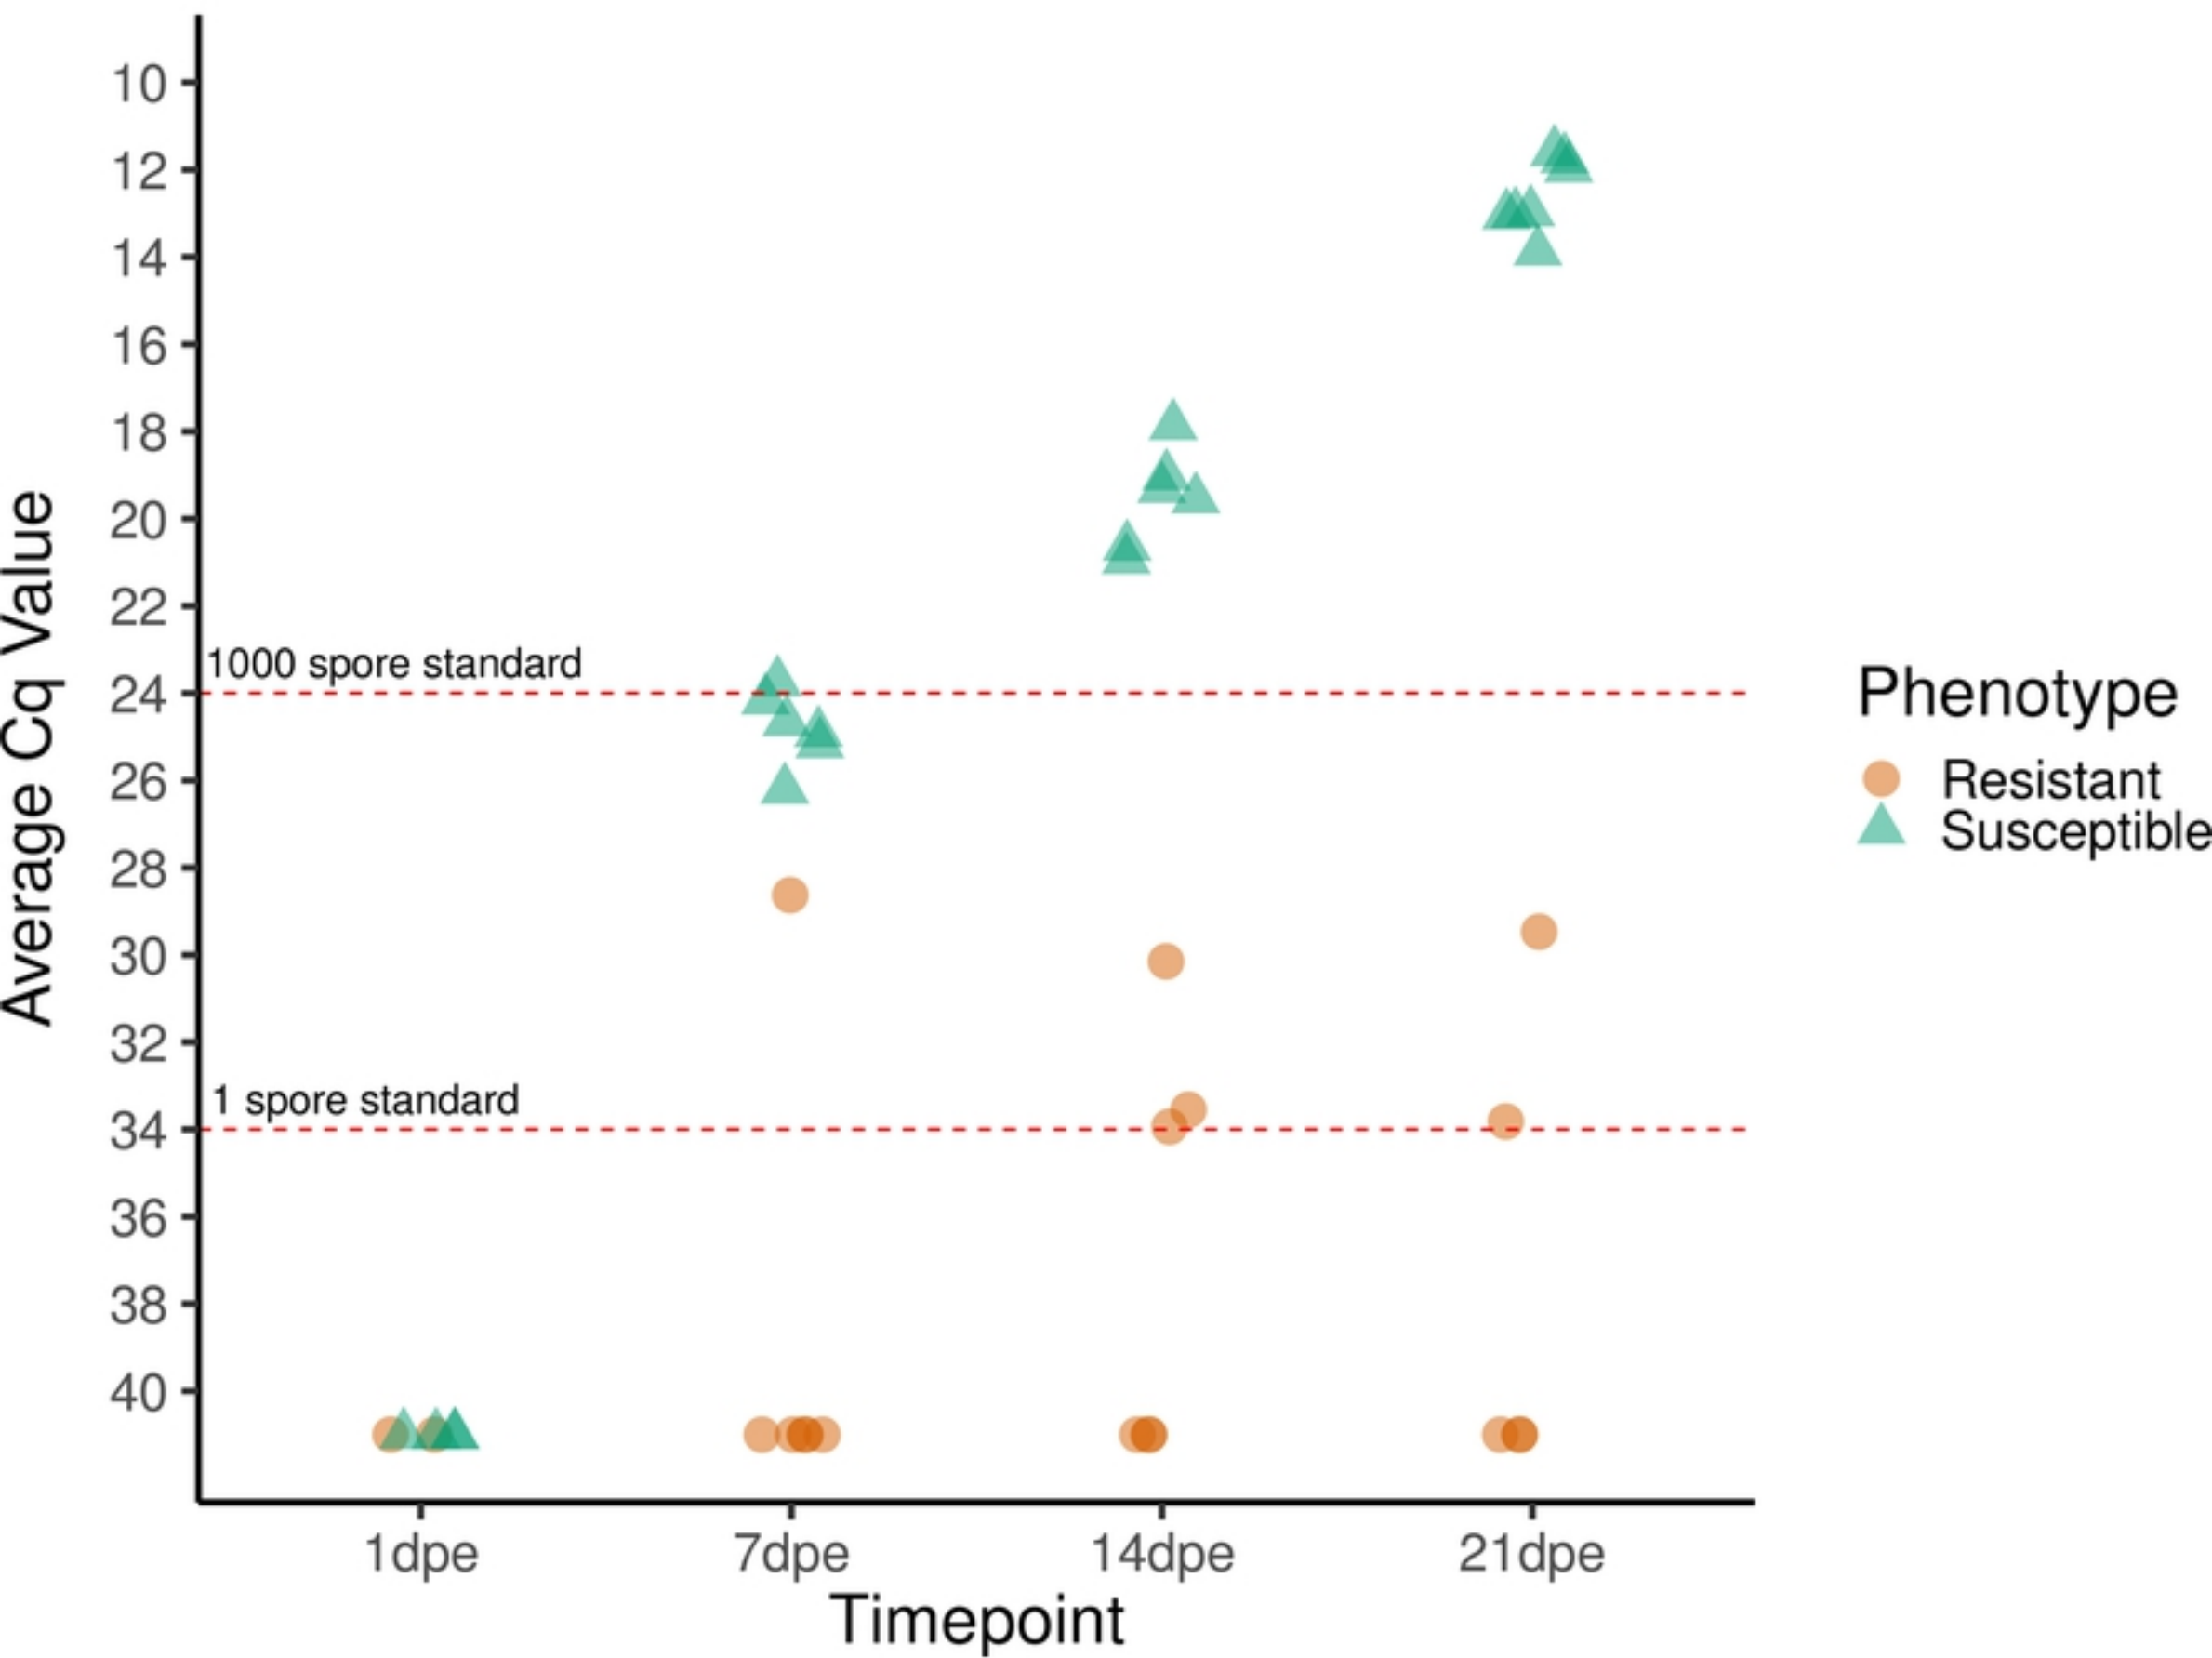

Figure 3

Resistant

Susceptible

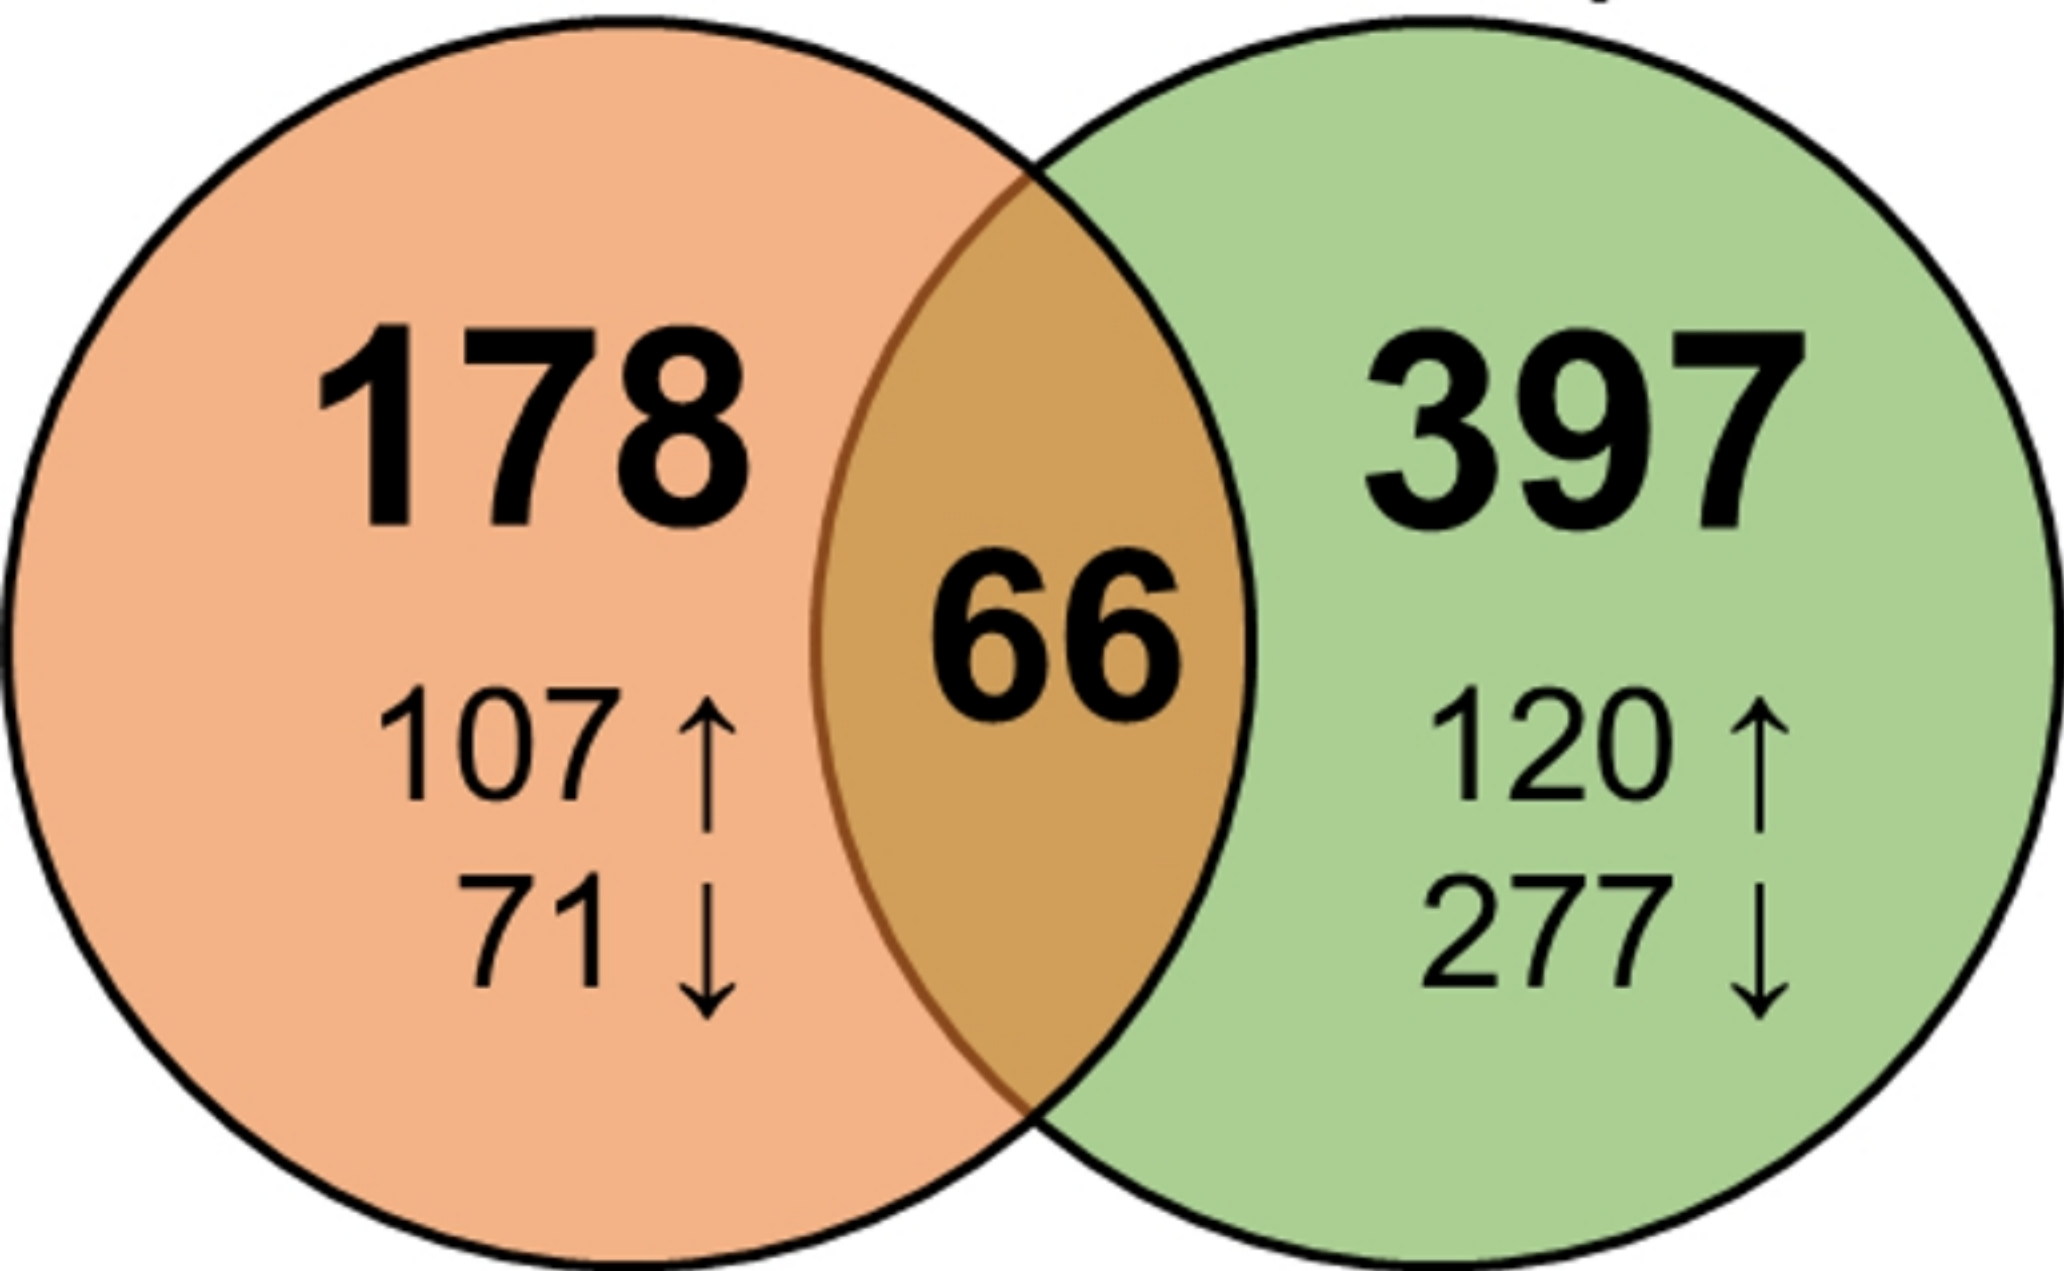

Figure 4



# A - Resistant

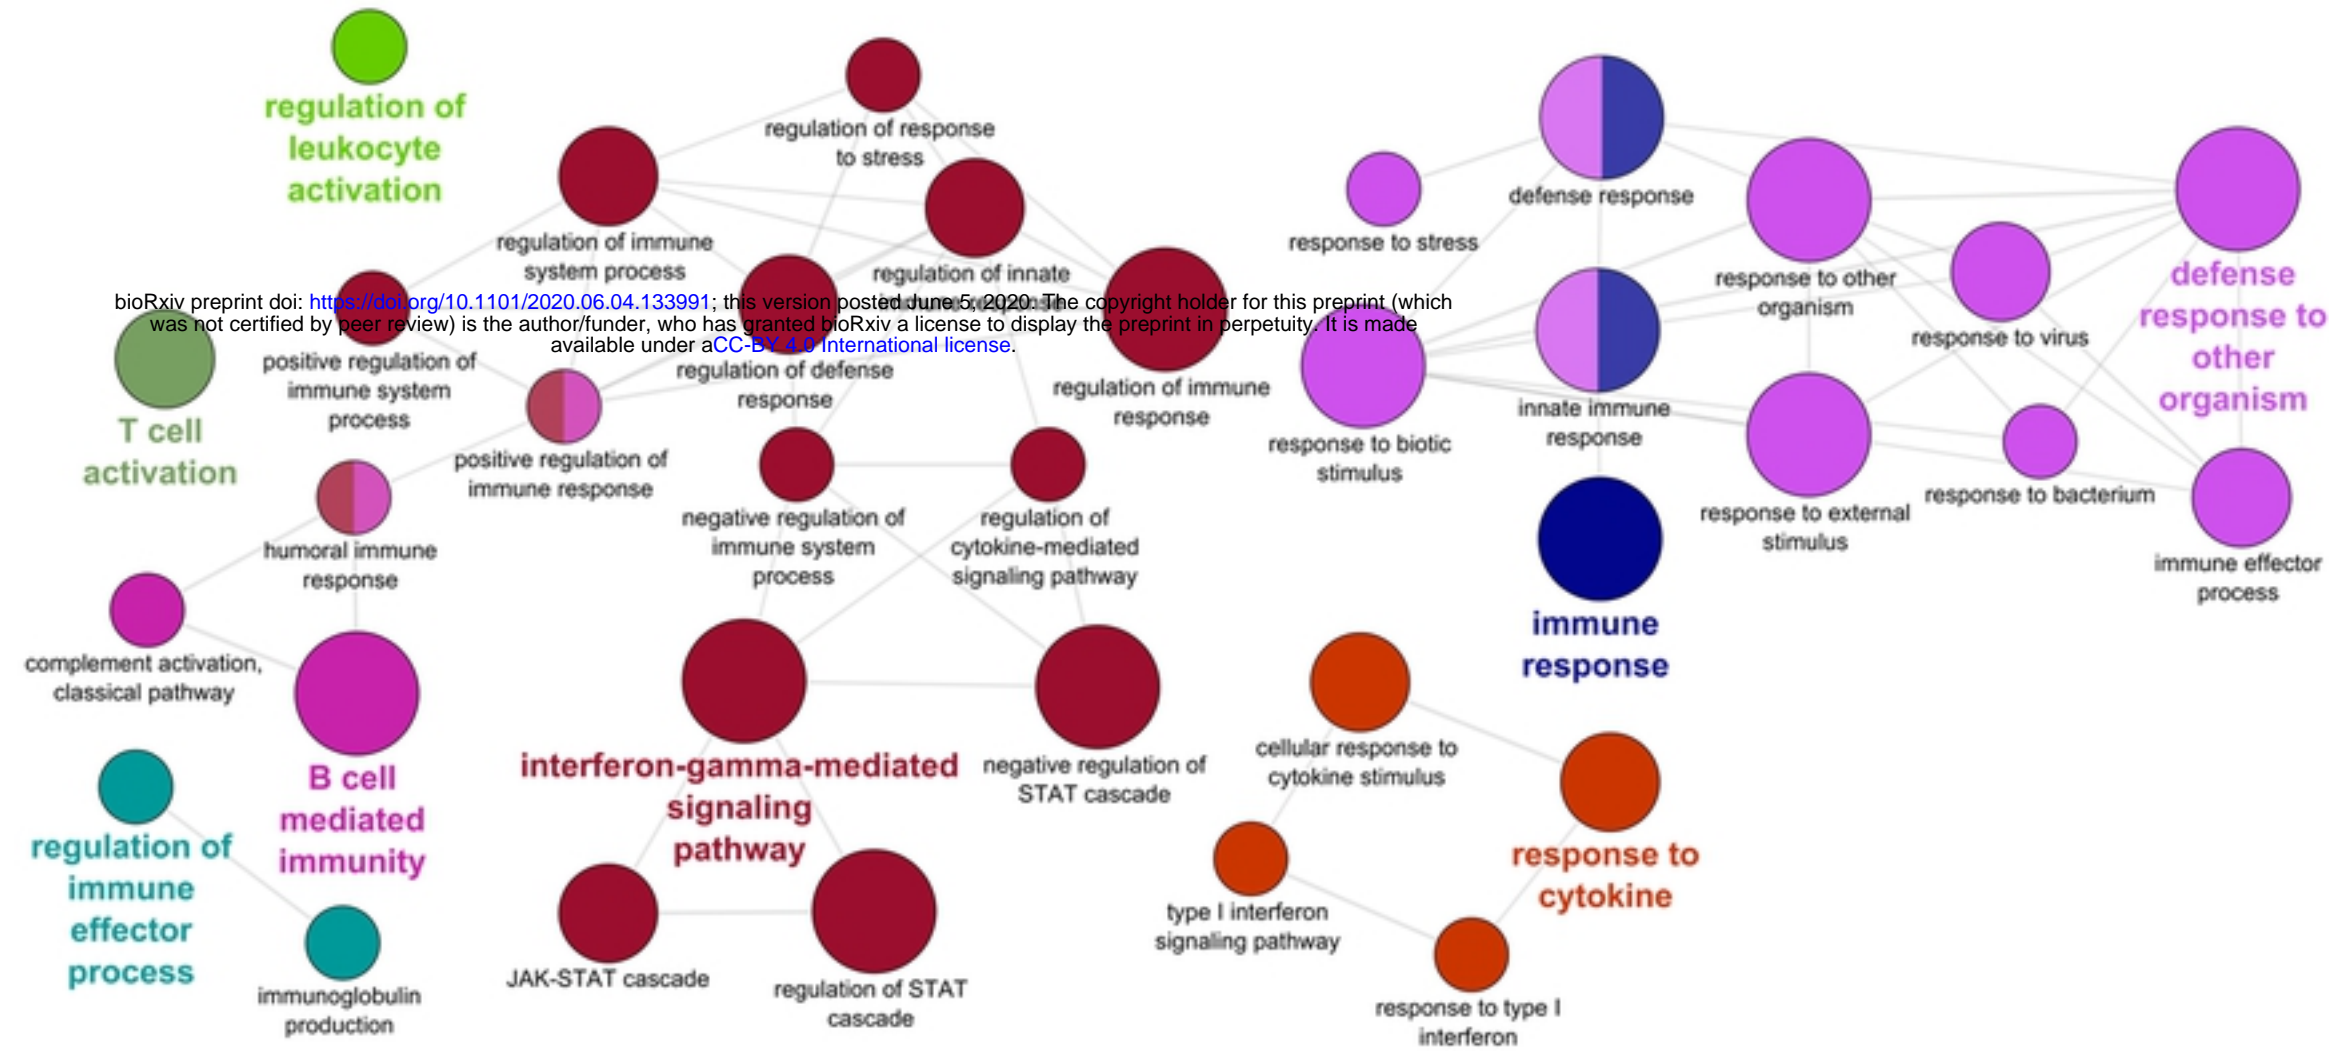

# B - Susceptible

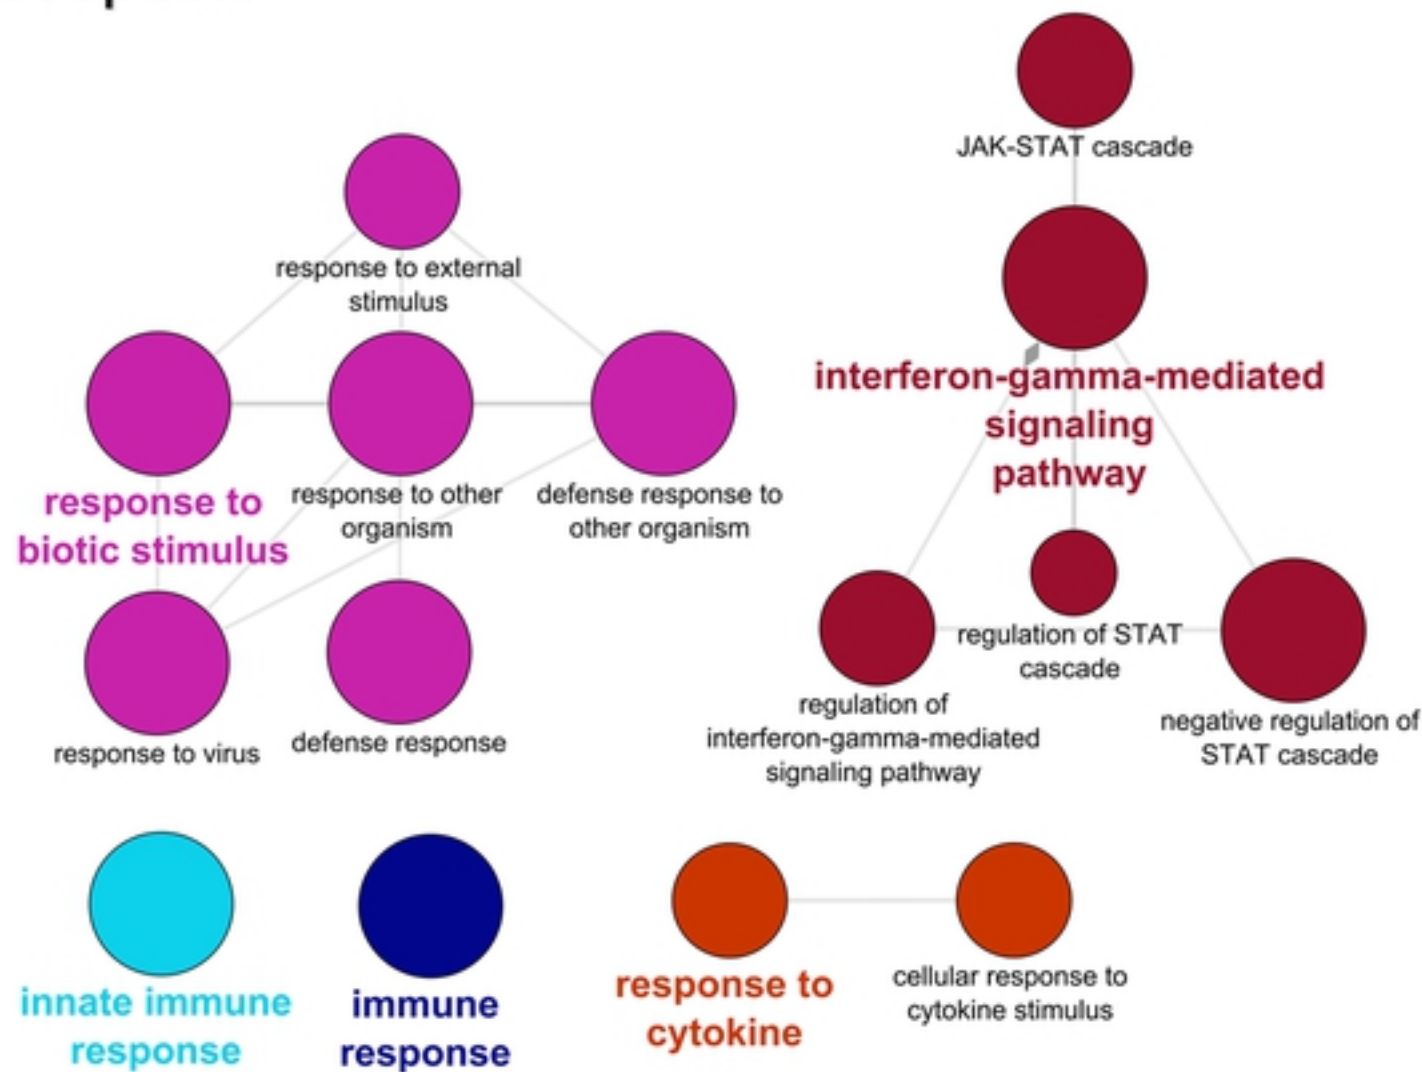

Figure 5

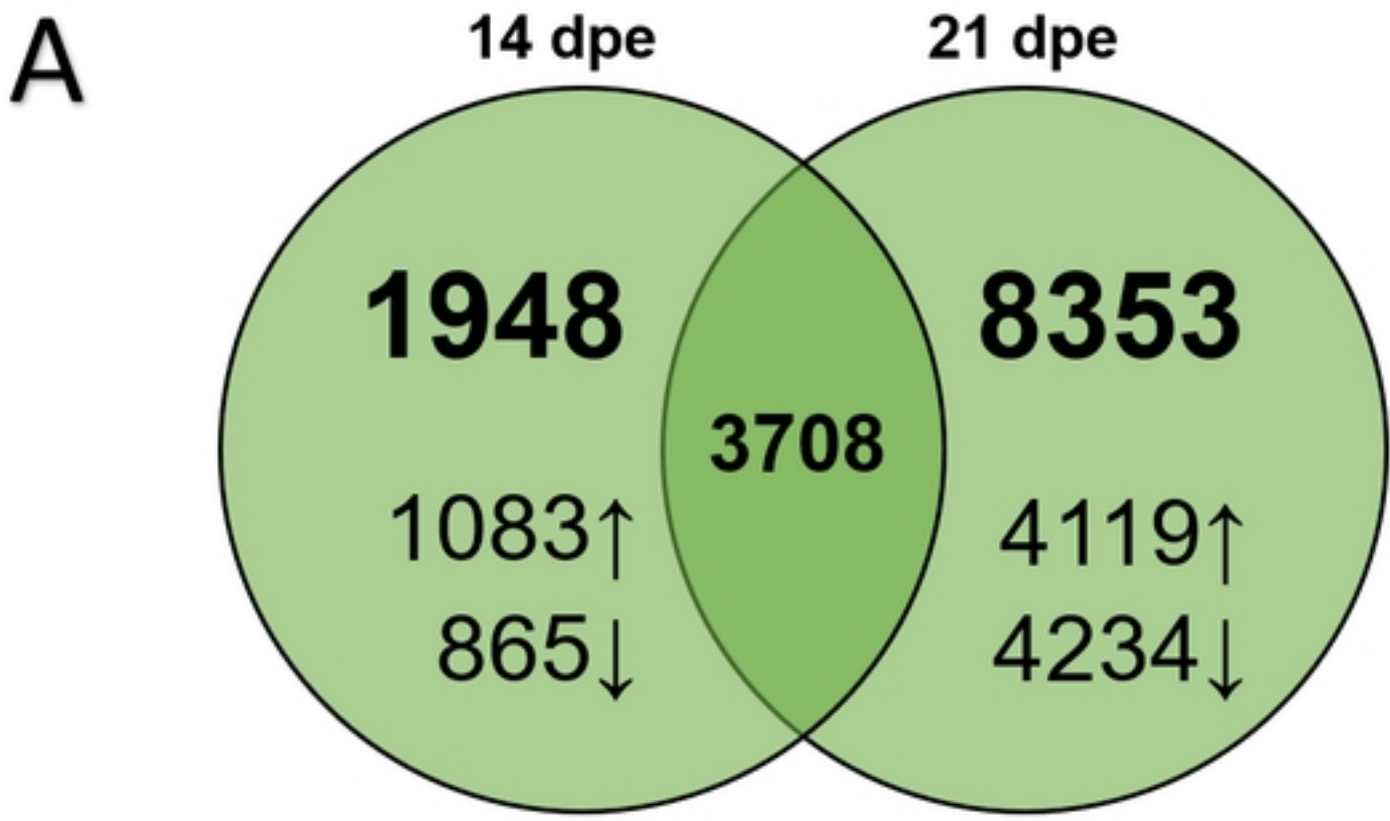

**B**      ● NS    ● Log2 FoldChange    ● p-value    ● p-value & Log2 FoldChange

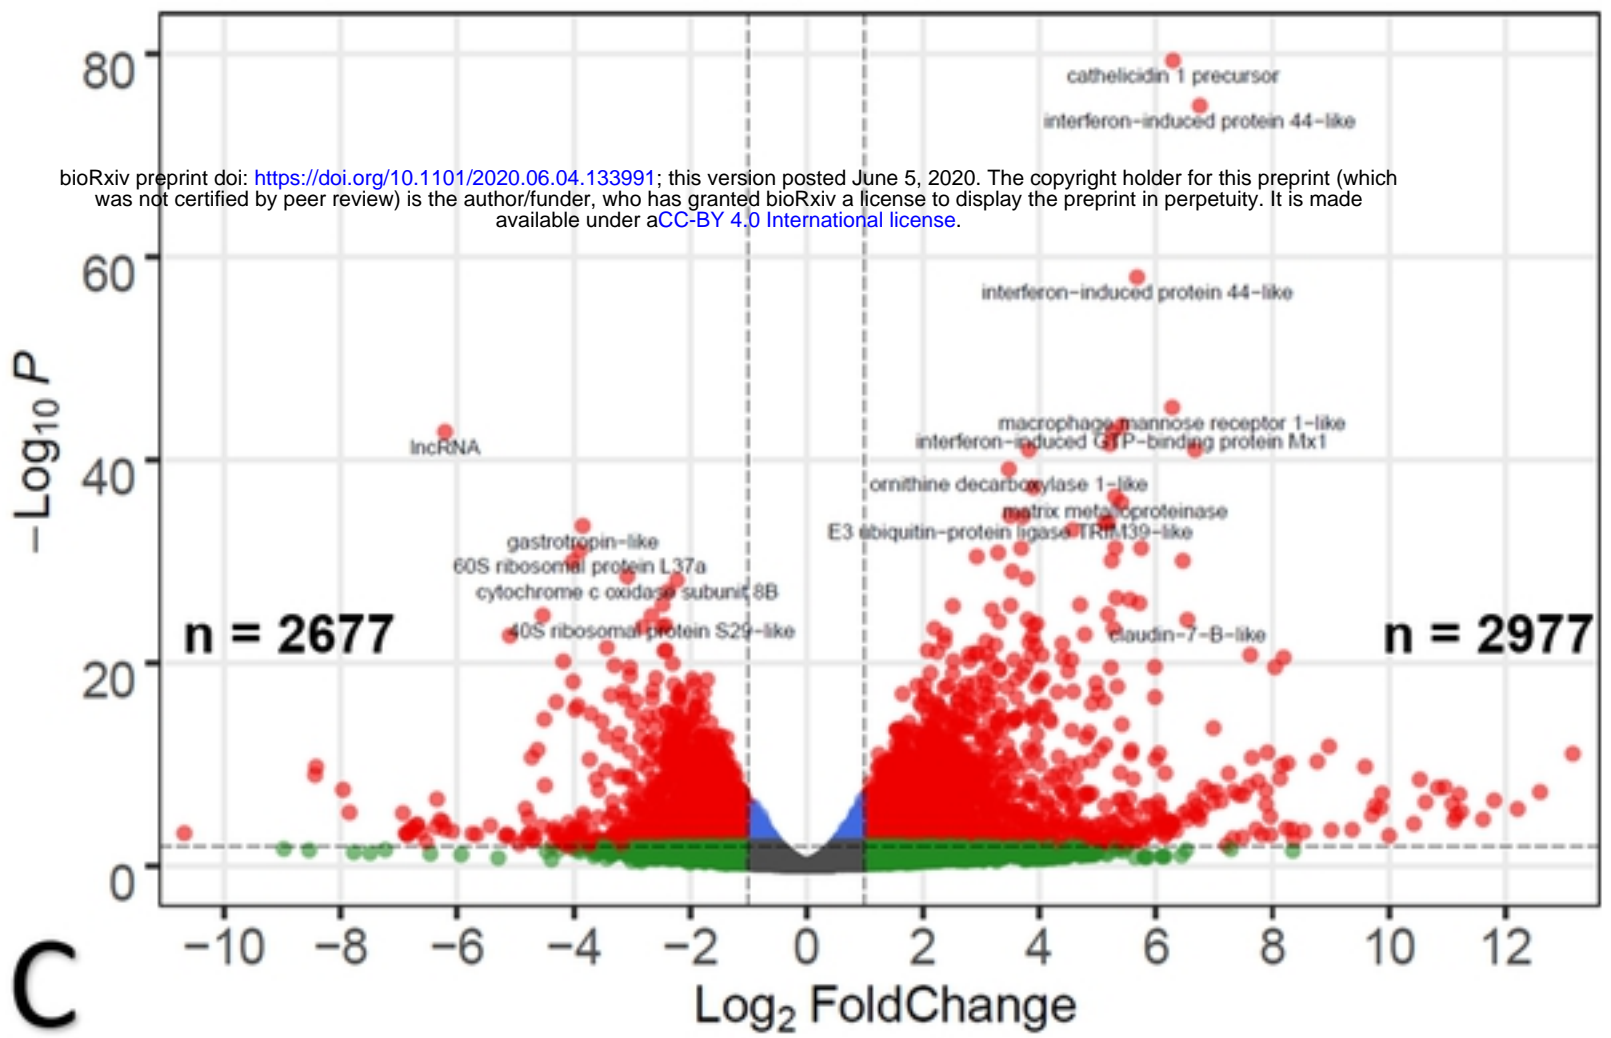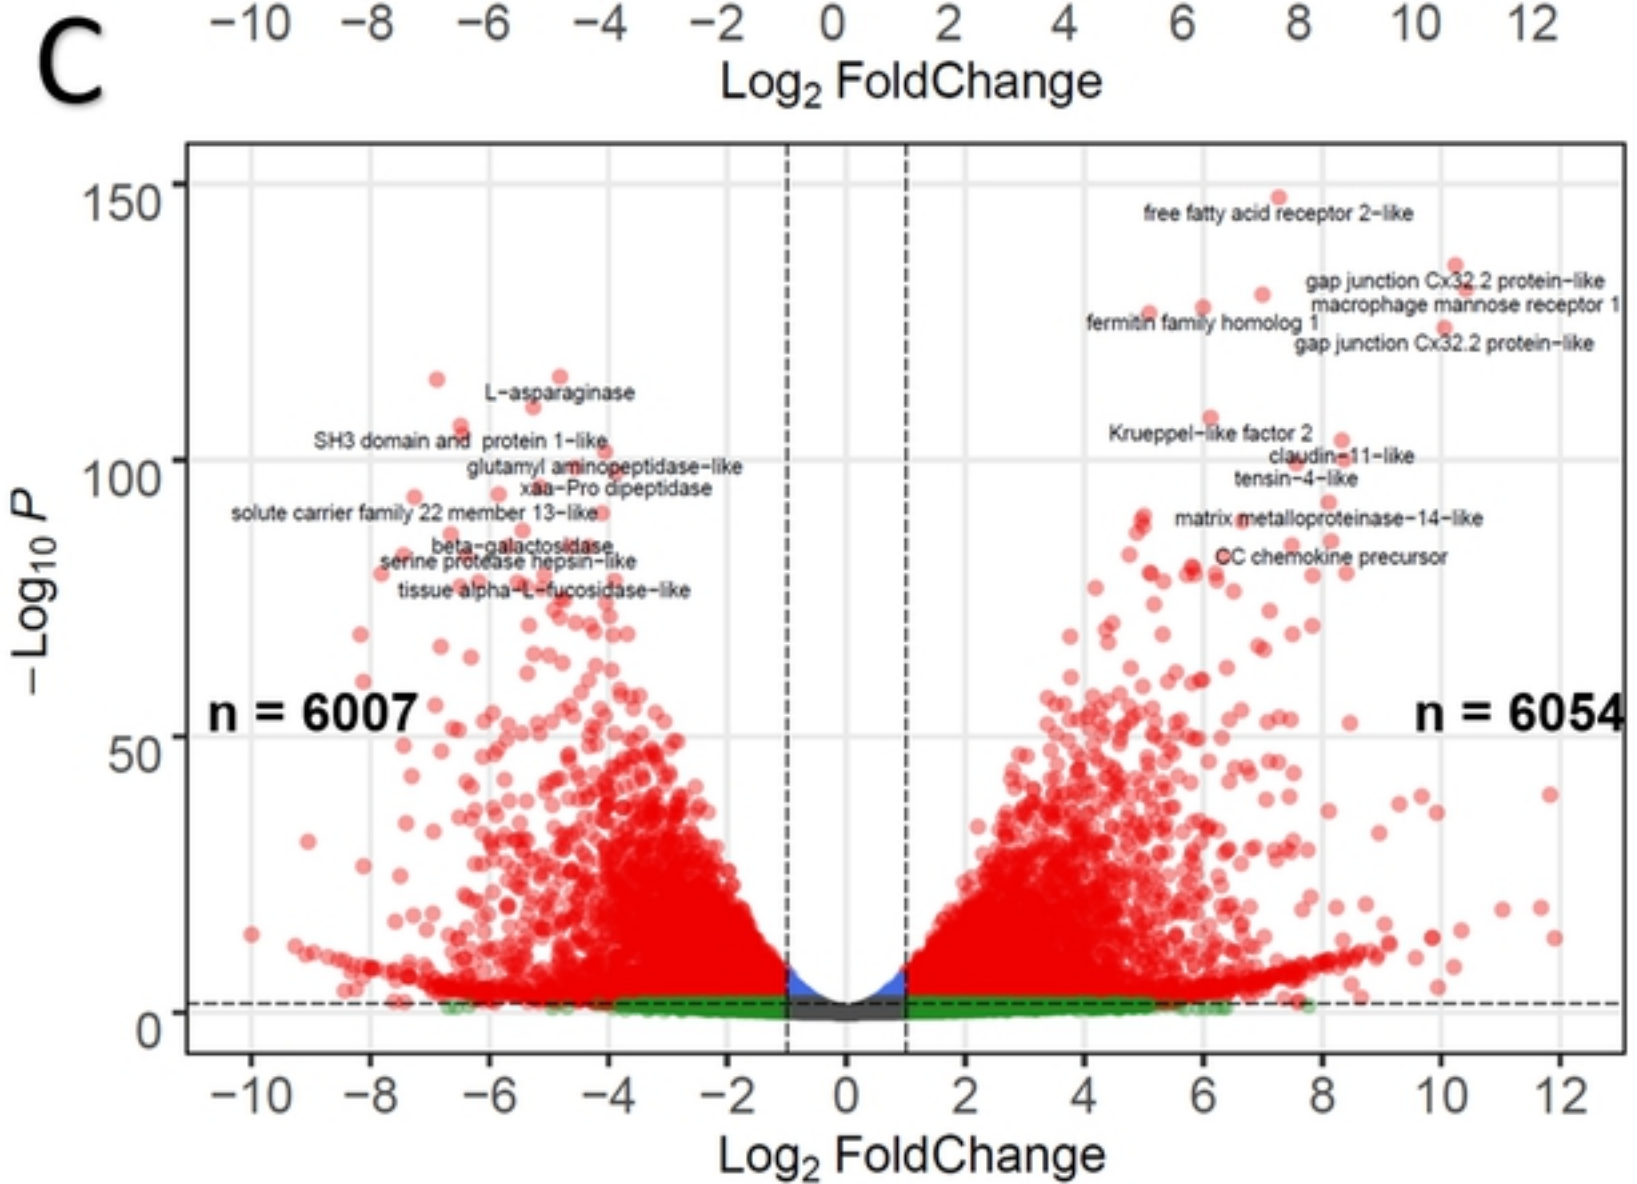

Figure 6

# A - upregulated

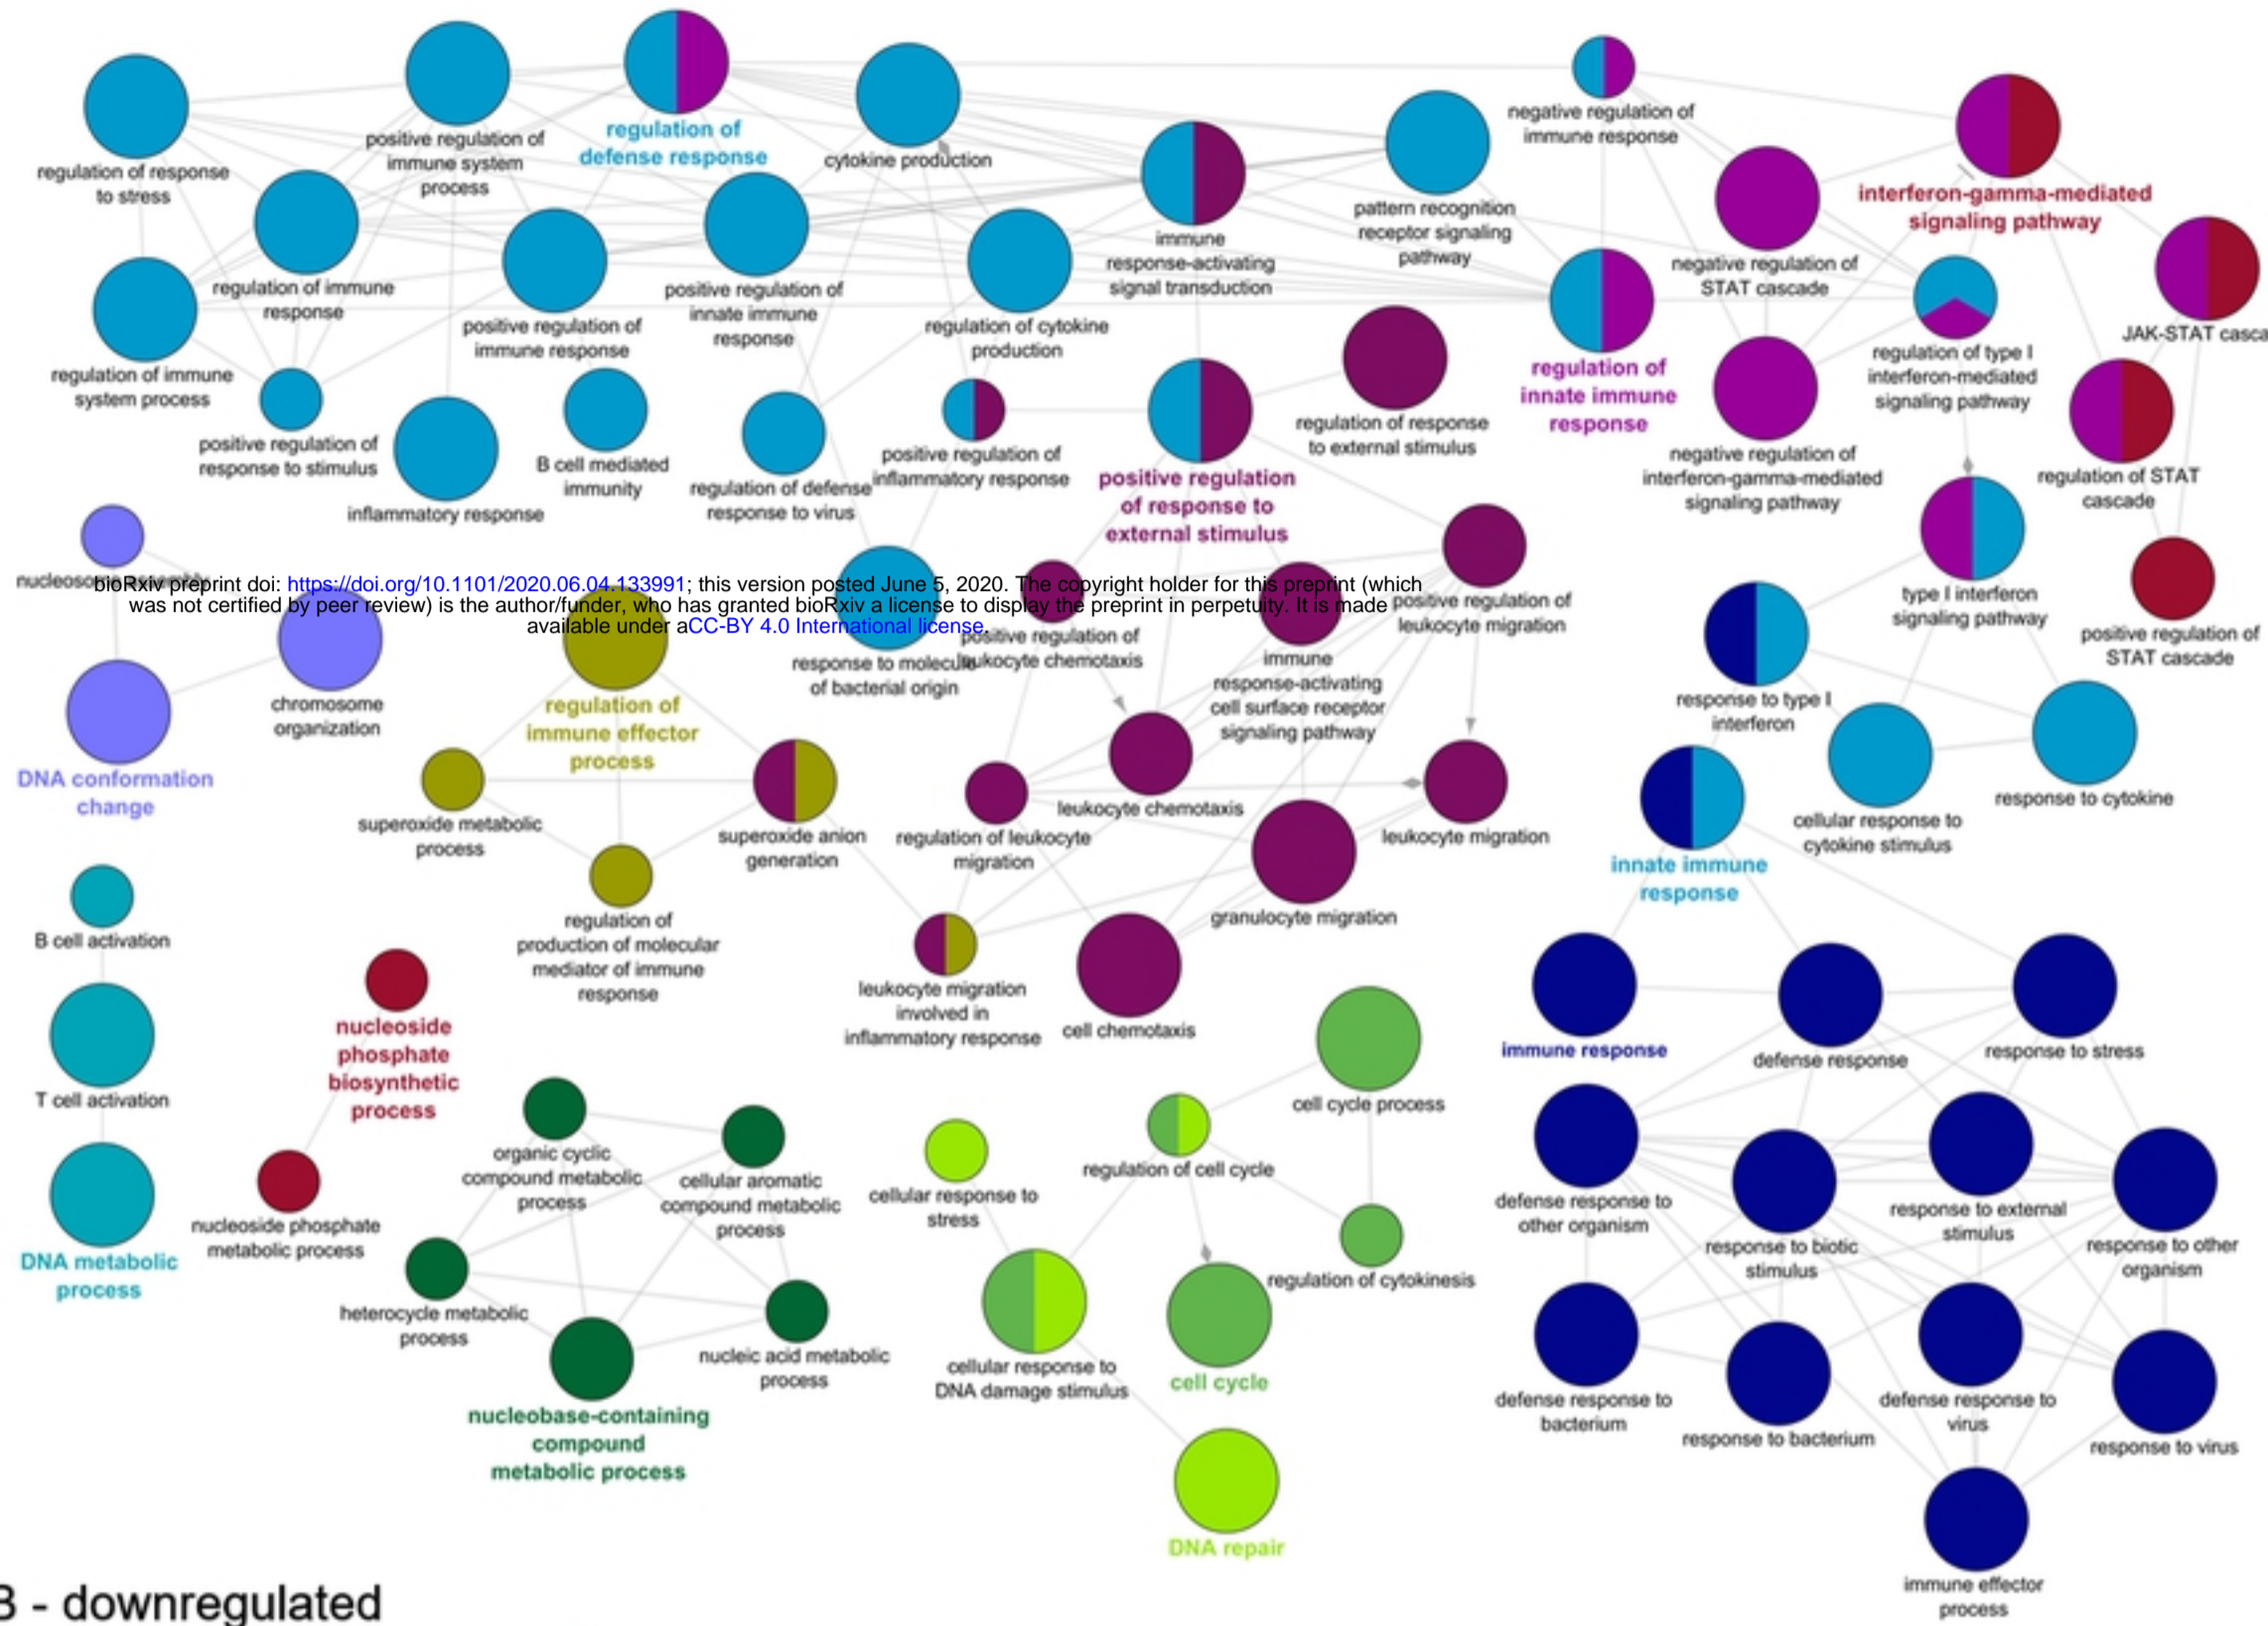

# B - downregulated

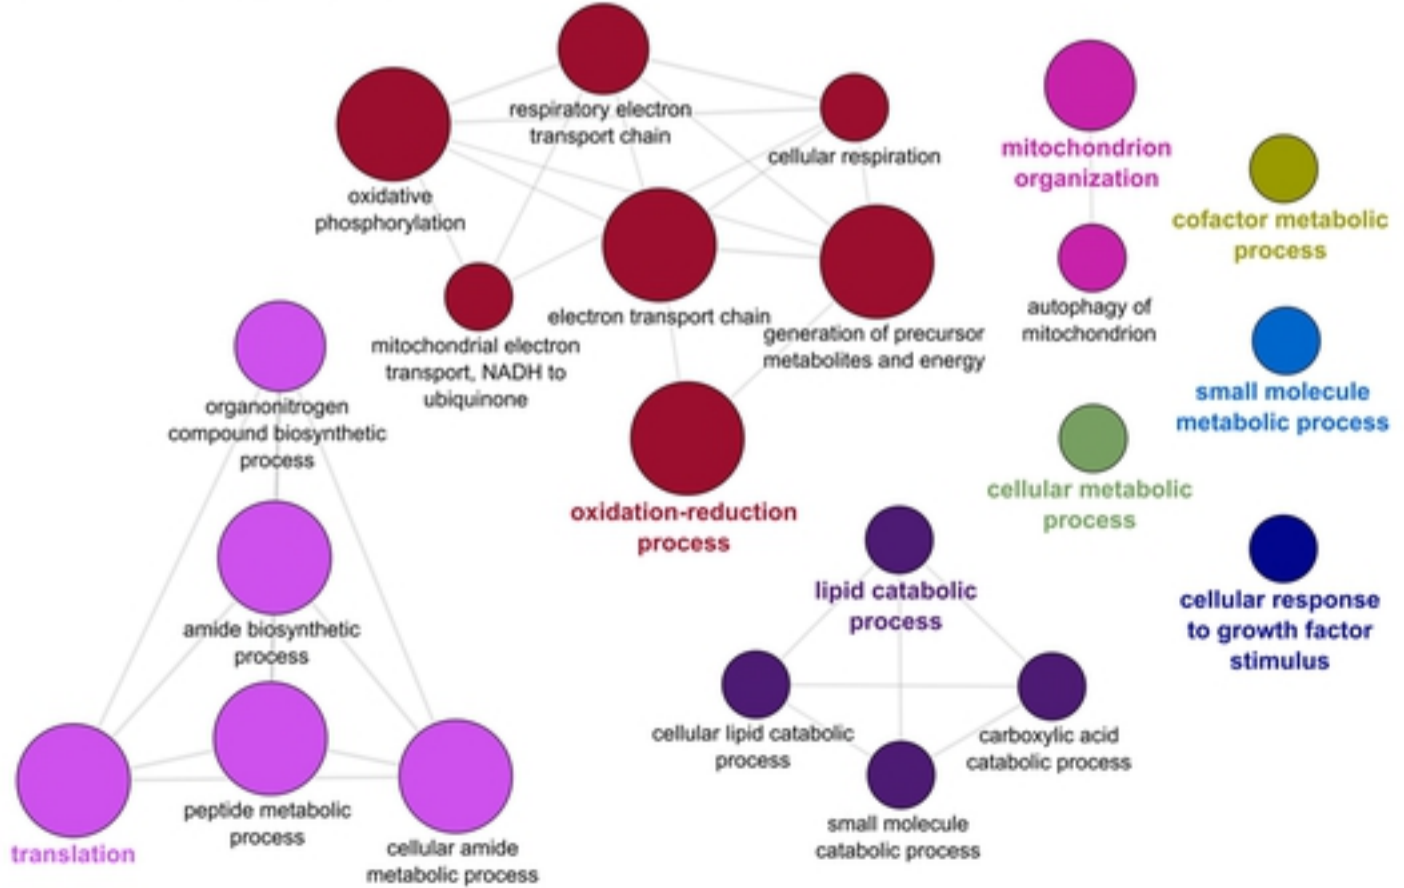

Figure 7

bioRxiv preprint doi: <https://doi.org/10.1101/2020.06.04.133991>; this version posted June 5, 2020. The copyright holder for this preprint (which was not certified by peer review) is the author/funder, who has granted bioRxiv a license to display the preprint in perpetuity. It is made available under aCC-BY 4.0 International license.

# A - upregulated

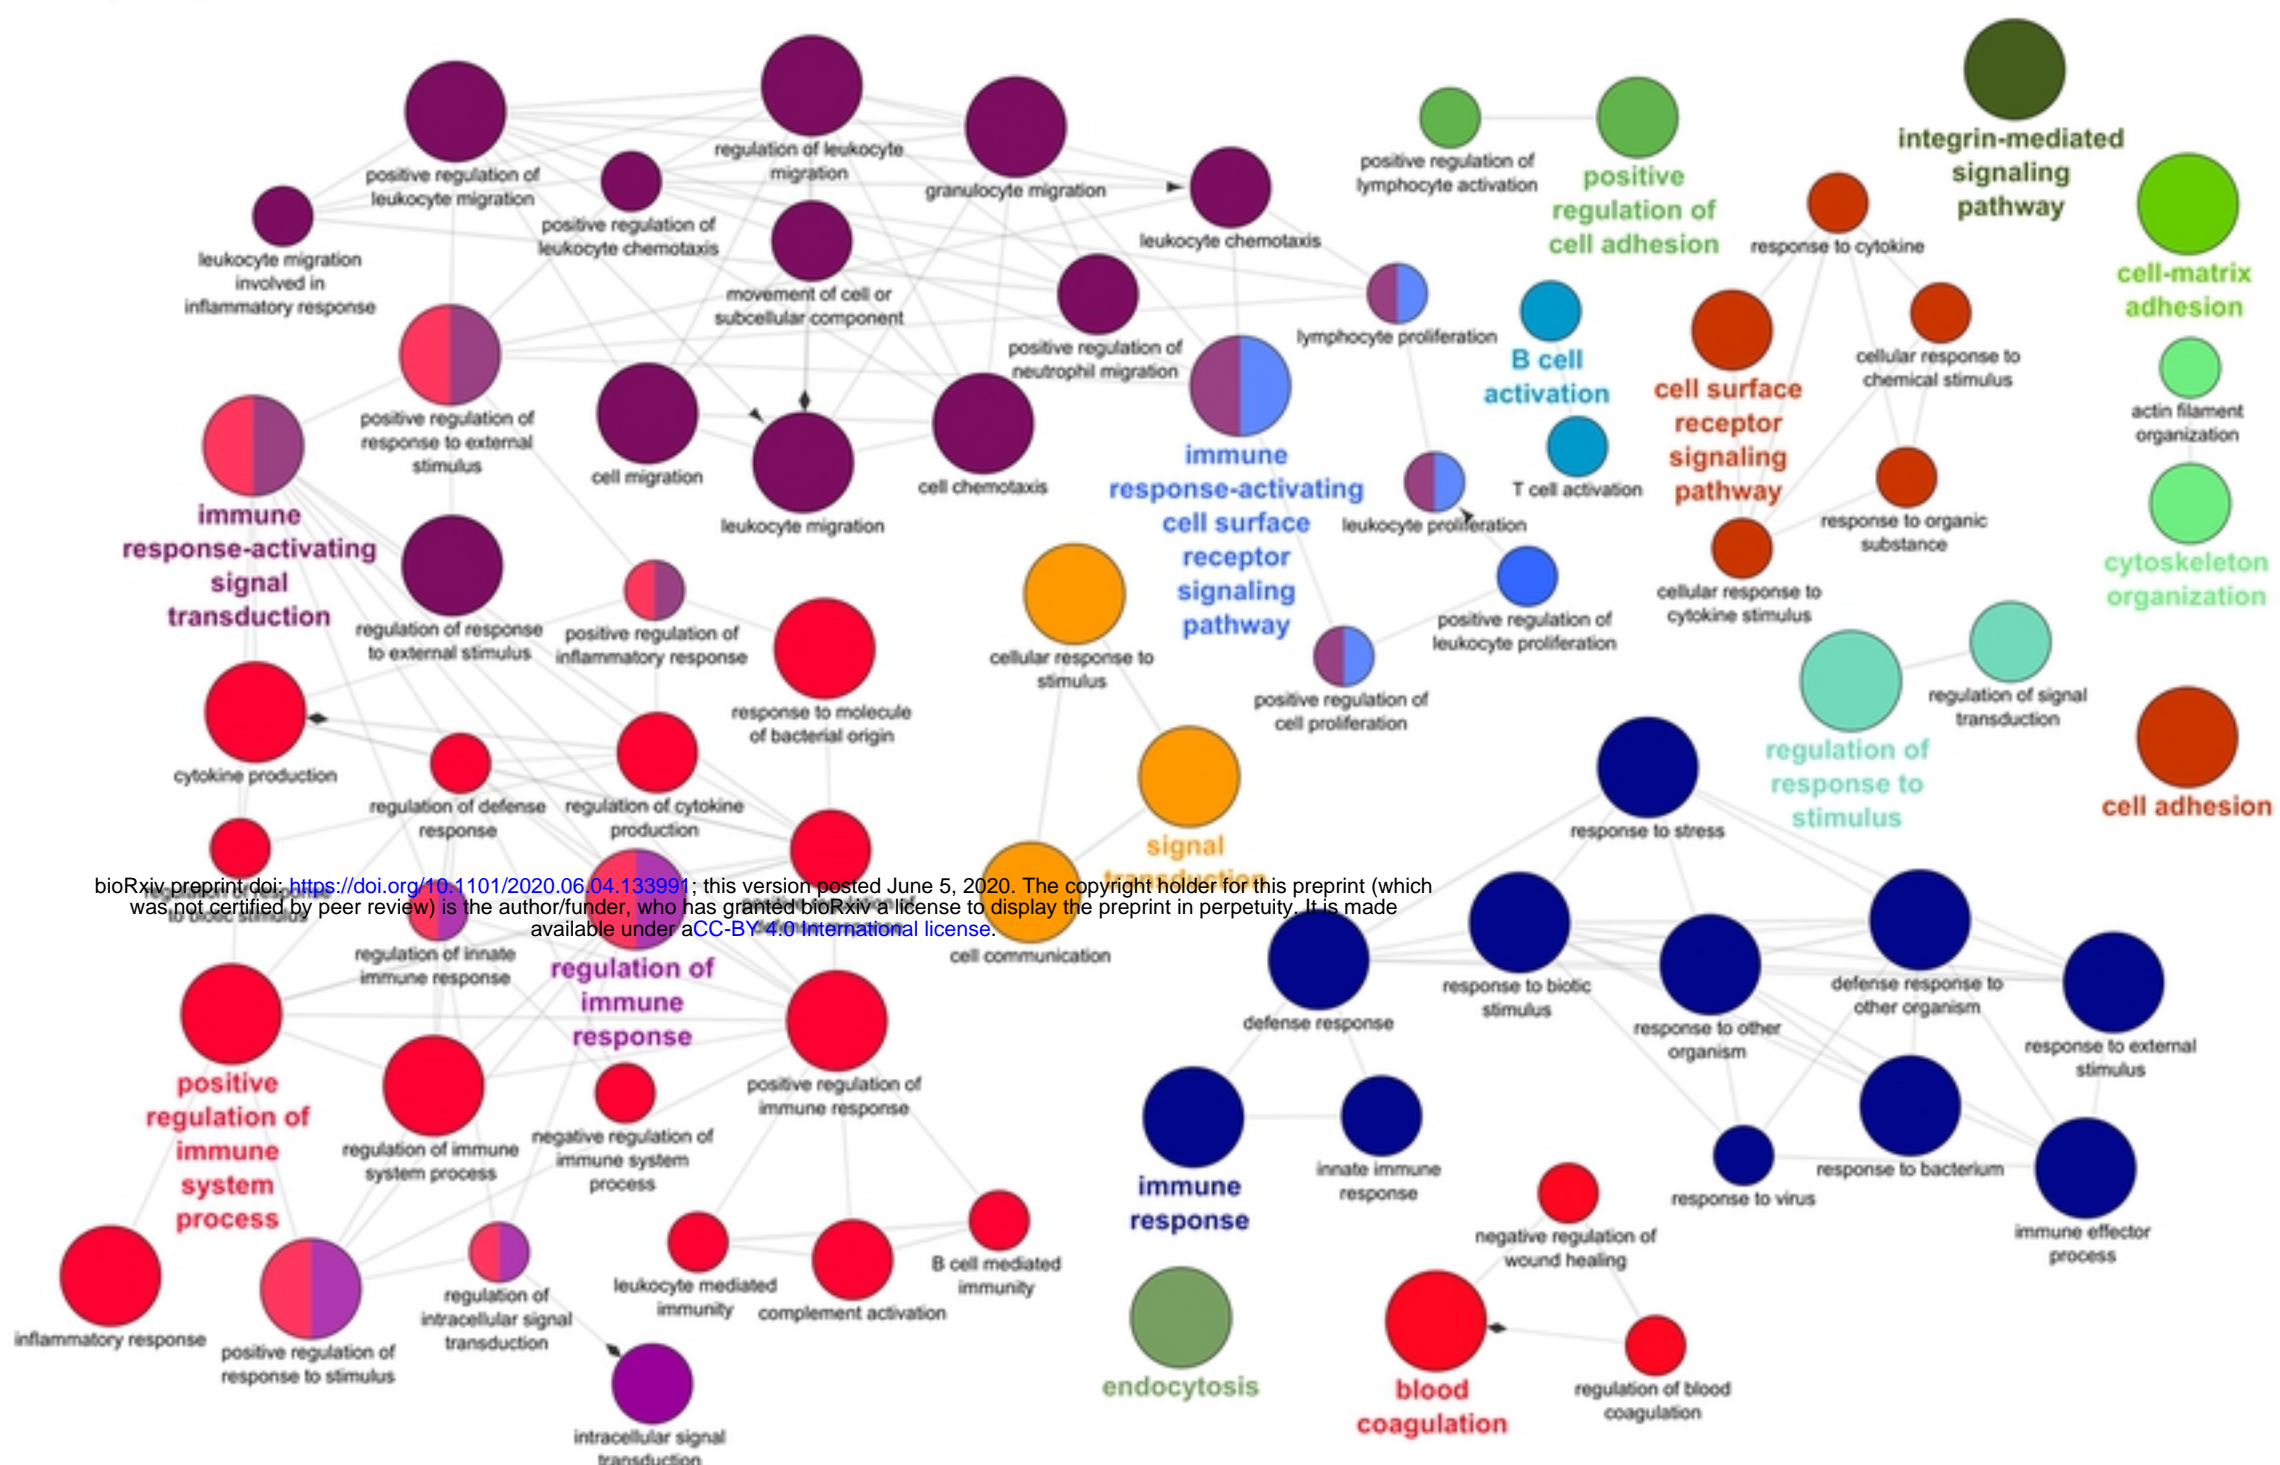

# B - downregulated

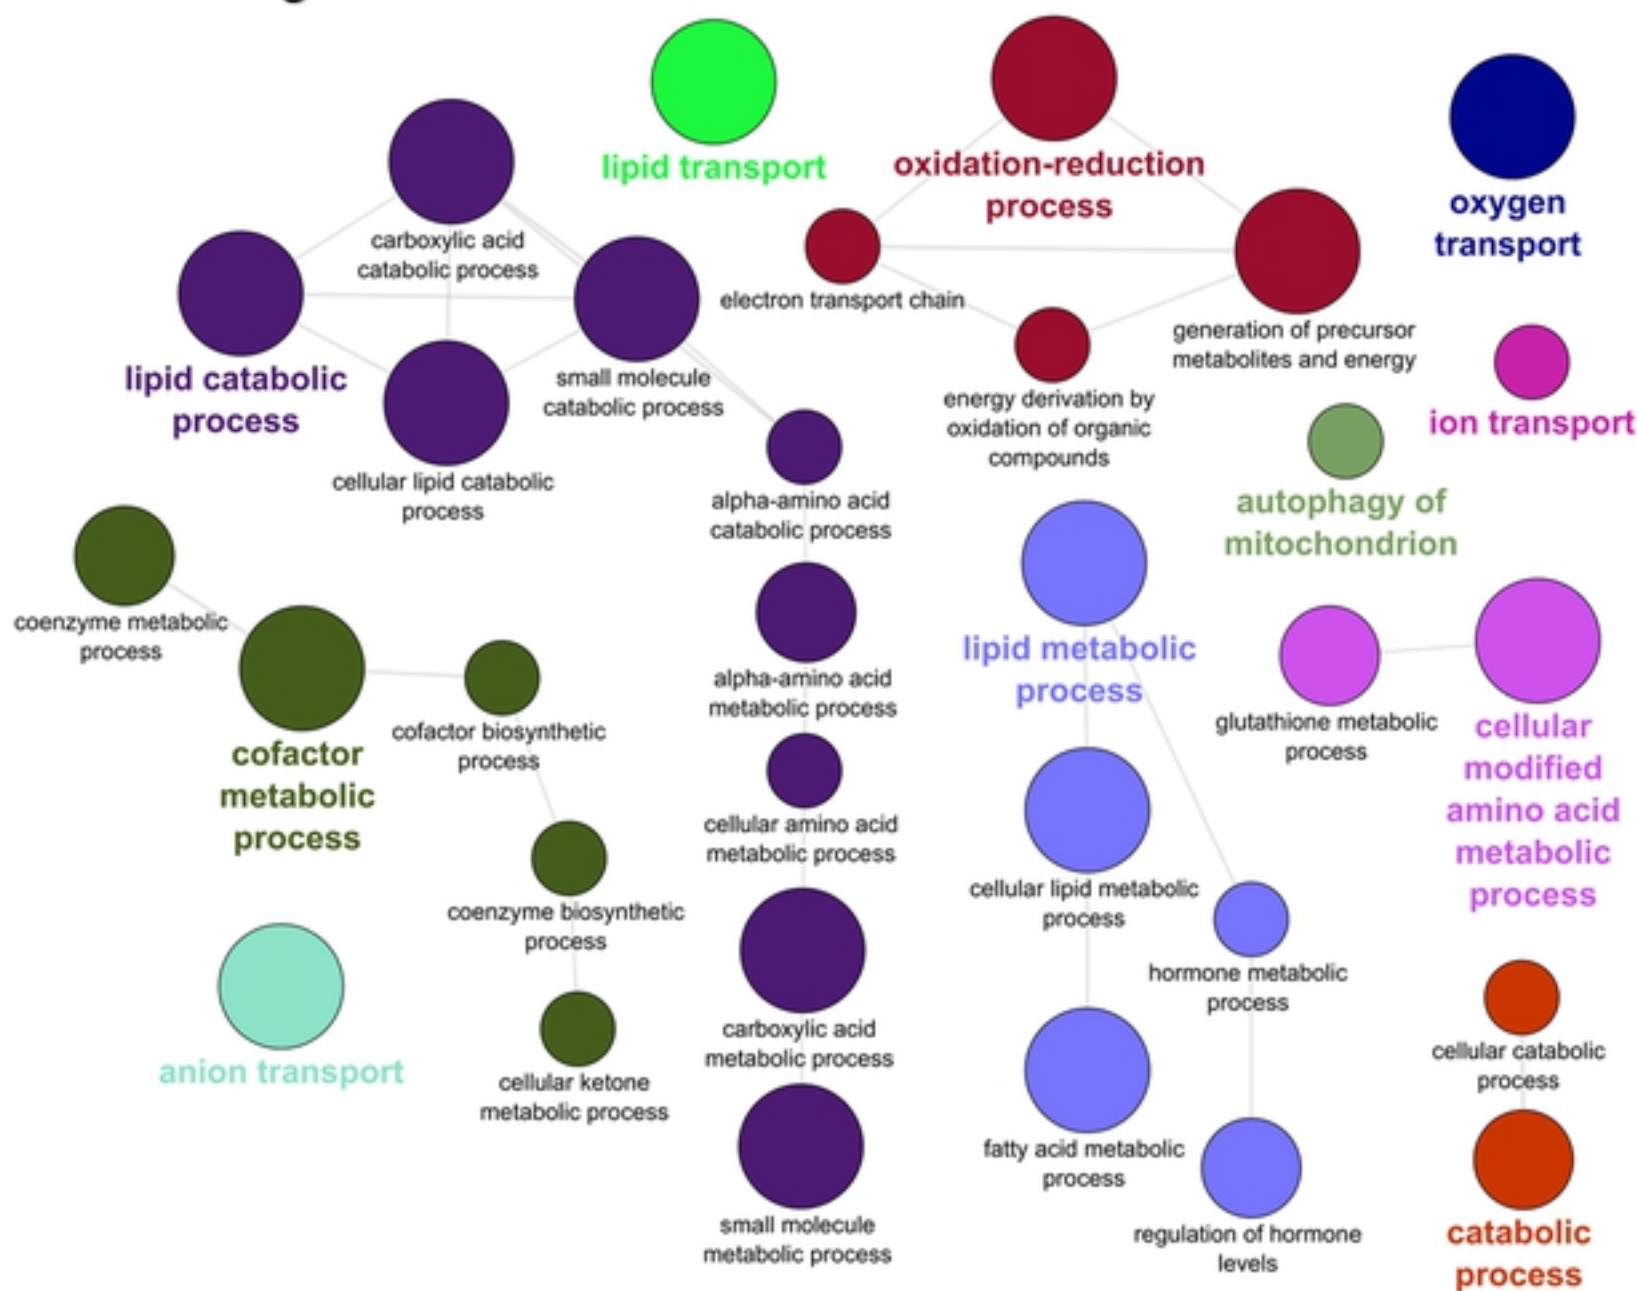

Figure 8

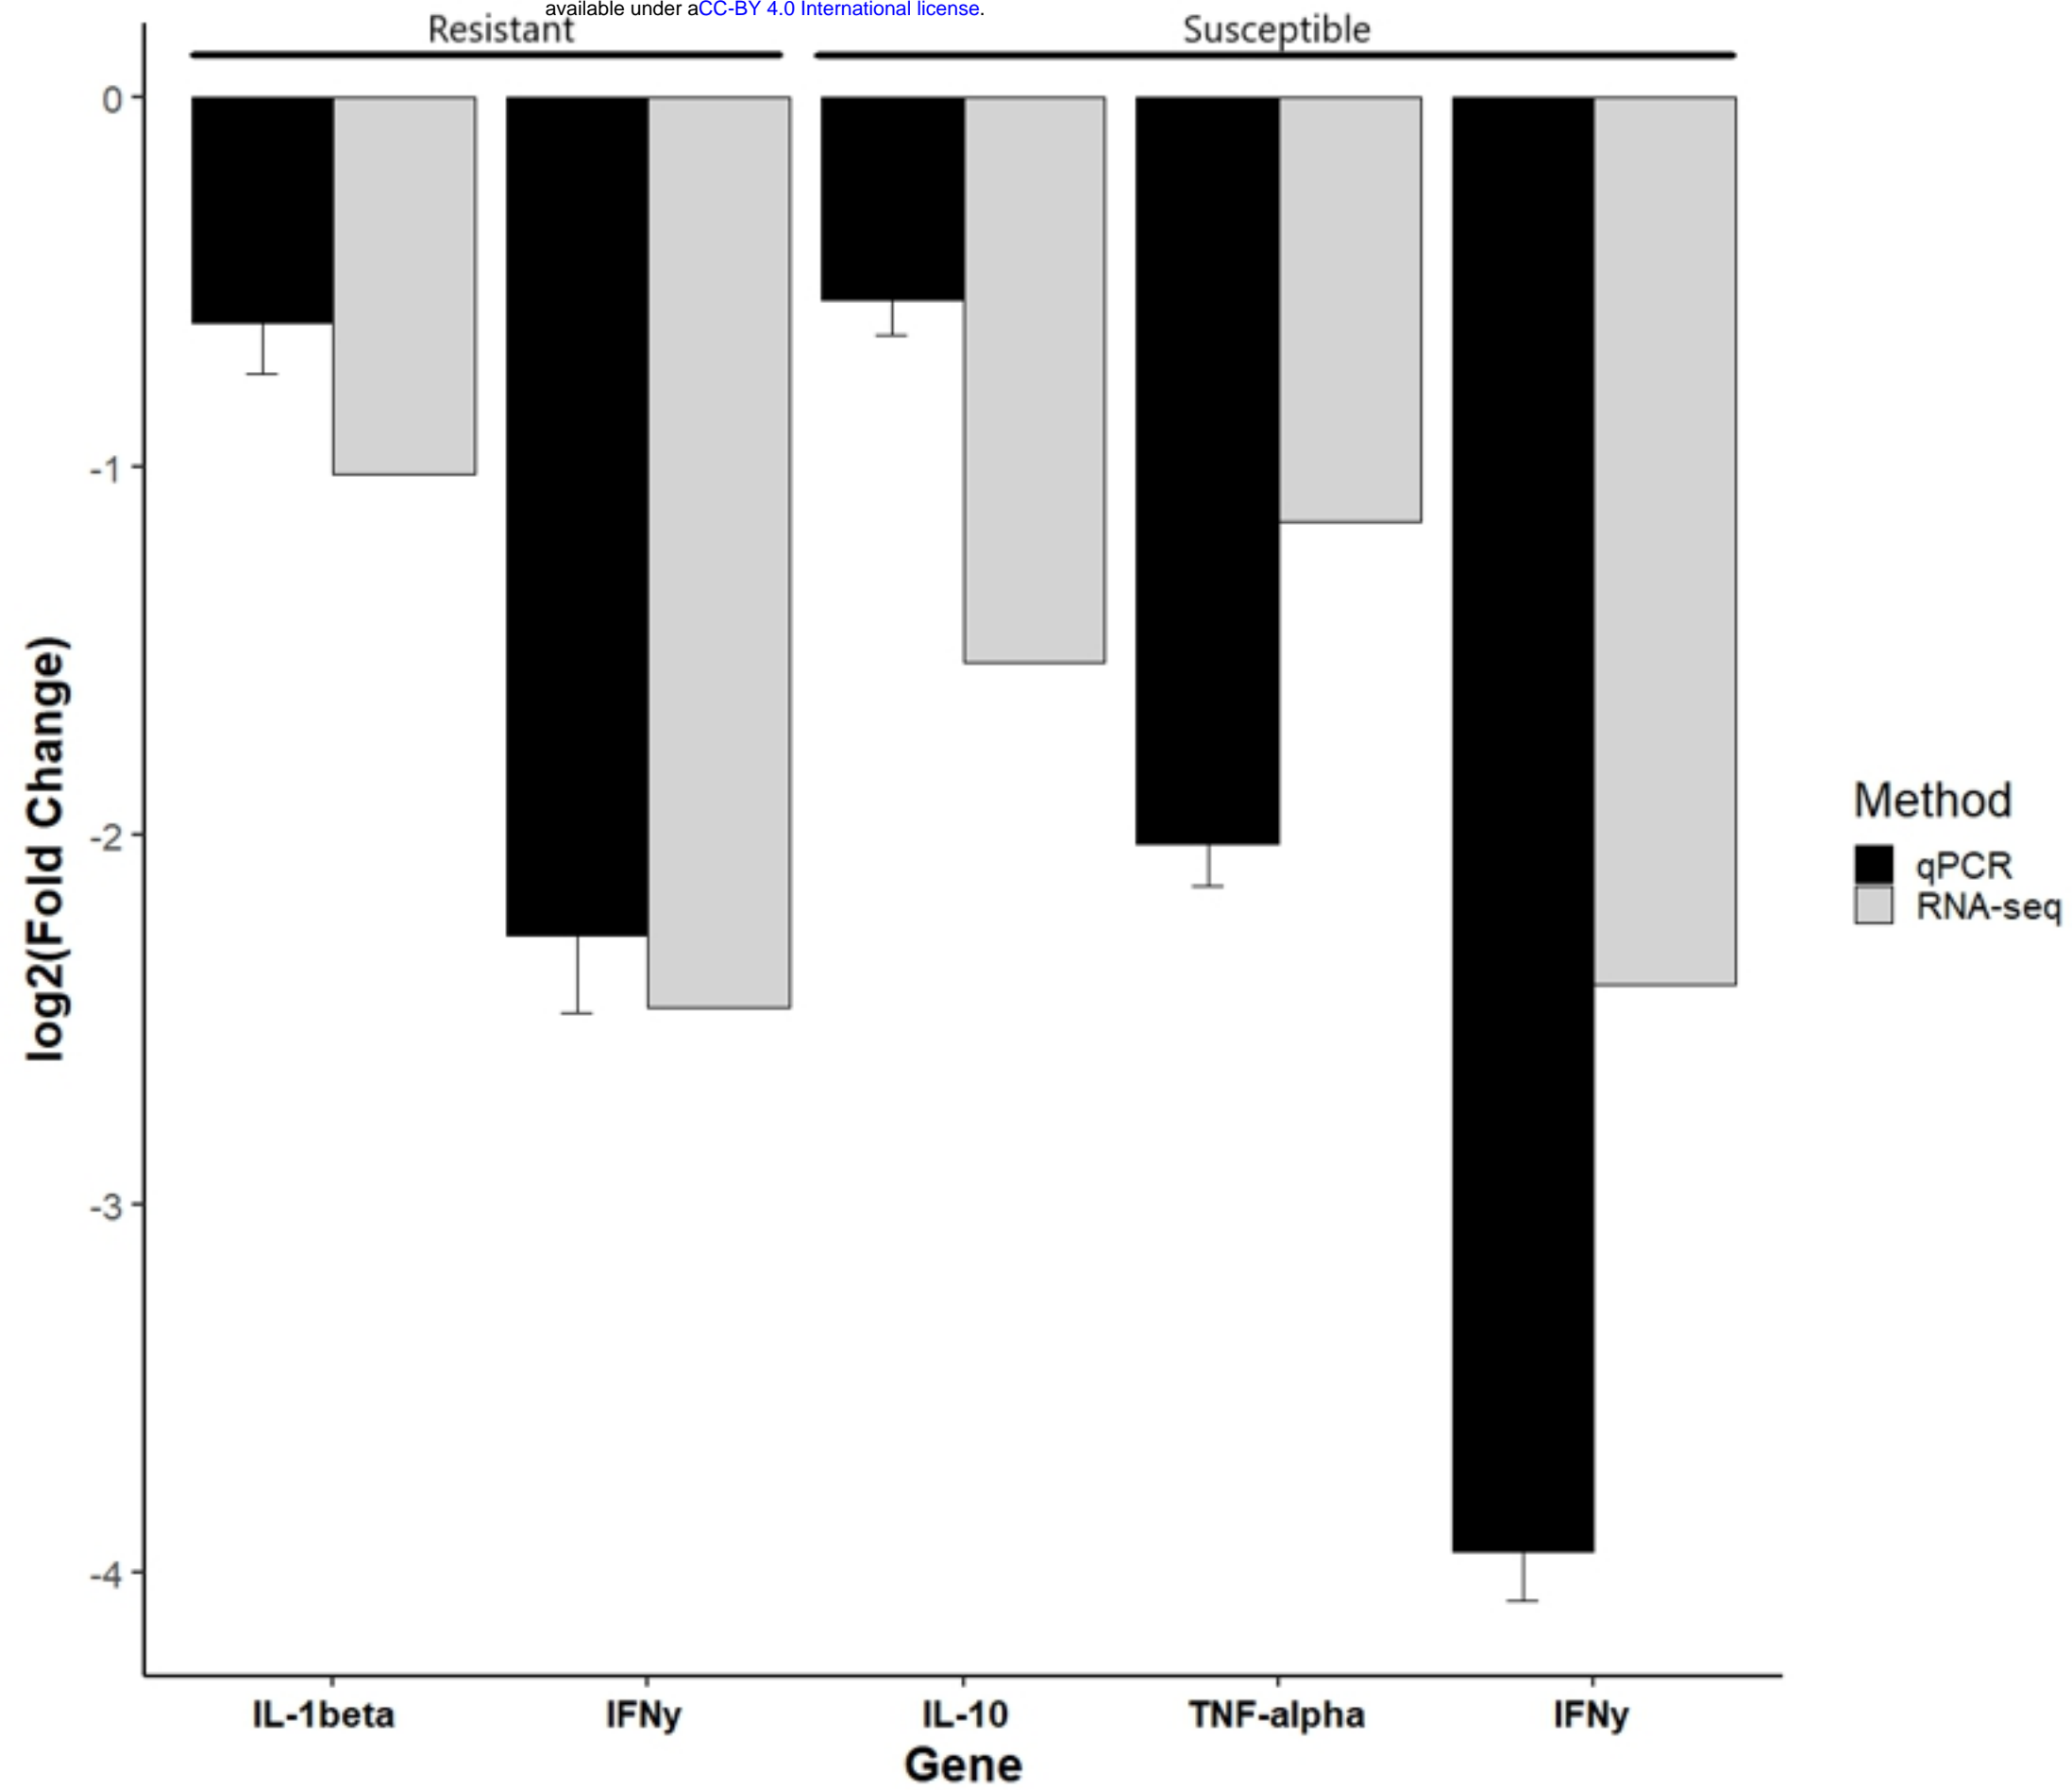

Figure 9
